# Supplementary material for: Stereoselective construction of sterically hindered oxaspirocycles via chiral bidentate directing group-mediated C(sp3)–O bond formation
Source: PubMed Central journal article supplement (PMC5875089; doi:10.1039/c7sc04691j), 2017-11-27
Supplement: SC-009-C7SC04691J-s001.pdf [file SC-009-C7SC04691J-s001.pdf]

## *Supporting Information*

# **Stereoselective Construction of Sterically Hindered Oxaspirocycles via Chiral Bidentate Directing Group-Mediated Csp<sup>3</sup>–O Bond Formation**

Yechan Kim,<sup>a,b,†</sup> Seoung-Tae Kim,<sup>a,b,†</sup> Dahye Kang,<sup>a,b</sup> Te-ik Sohn,<sup>a,b</sup> Eunyoung Jang,<sup>a,b</sup> Mu-Hyun Baik,<sup>\*,b,a</sup> and Sungwoo Hong<sup>\*,b,a</sup>

<sup>a</sup>Department of Chemistry, Korea Advanced Institute of Science and Technology (KAIST), Daejeon, 34141, Korea

<sup>b</sup>Center for Catalytic Hydrocarbon Functionalizations, Institute for Basic Science (IBS), Daejeon 34141, Korea

|                                         |     |
|-----------------------------------------|-----|
| <b>I. General Methods and Materials</b> | S2  |
| <b>II. Experimental Procedure</b>       | S3  |
| <b>III. Optimization Study</b>          | S11 |
| <b>IV. Compound Characterizations</b>   | S15 |
| <b>V. Computational Study</b>           | S27 |
| <b>VI. Reference</b>                    | S85 |

### *Appendix I*

|                                                                                             |     |
|---------------------------------------------------------------------------------------------|-----|
| <b>Spectral Copies of <sup>1</sup>H- and <sup>13</sup>C-NMR Data Obtained in this Study</b> | S86 |
|---------------------------------------------------------------------------------------------|-----|

### *Appendix II*

|                                     |      |
|-------------------------------------|------|
| <b>Crystallographic Data for 2a</b> | S114 |
|-------------------------------------|------|

## I. General Methods and Materials.

Commercial grade reagents and solvents were used without further purification except as indicated below. Analytical thin layer chromatography (TLC) was performed on precoated silica gel 60 F<sup>254</sup> plates and visualization on TLC was achieved by UV light (254 nm) and anisaldehyde solution, and heat as developing agents. Flash column chromatography was undertaken on silica gel (400-630 mesh). <sup>1</sup>H NMR was recorded on 400 MHz and chemical shifts were quoted in parts per million (ppm) referenced to the appropriate solvent peak or 2.50 ppm for DMSO-*d*<sub>6</sub>. The following abbreviations were used to describe peak splitting patterns when appropriate: br = broad, s = singlet, d = doublet, t = triplet, q = quartet, m = multiplet, dd = doublet of doublet, td = triplet of doublet, ddd = doublet of doublet of doublet. Coupling constants, *J*, were reported in hertz unit (Hz). <sup>13</sup>C NMR was recorded on 151 MHz and was fully decoupled by broad band proton decoupling. Chemical shifts were reported in ppm referenced to the center line of a septet at 39.5 ppm of DMSO-*d*<sub>6</sub>. Diastereomeric ratios were determined by integration of HPLC. Analytical HPLC was performed with an Agilent 1200 Series HPLC utilizing Poroschell 120 EC-C18 columns (4.6 × 50 mm or 4.6 × 150 mm) with visualization at 254 nm. The HPLC column was operated at 35 °C. Mass spectral data were obtained from the KAIST Basic Science Institute by using ESI method.

## II. Experimental Procedure

### Scheme S1. General Procedure for Synthesis of Chiral Bidentate Directing Groups

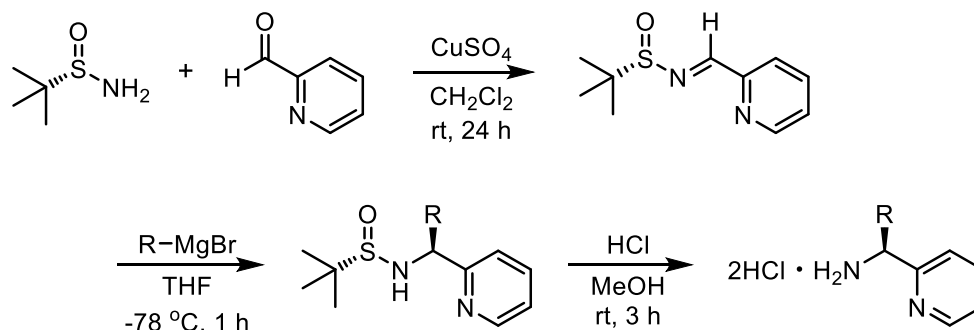

**Synthesis of *N*-sulfinylimine.**<sup>1</sup> To a solution of (*S*)-(-)-2-methyl-2-propanesulfonamide (5.0 g, 41.3 mmol) and flame-dried copper(II) sulfate (19.8 g, 123.9 mmol) in  $\text{CH}_2\text{Cl}_2$  (80 mL) was added dropwise 2-pyridinecarboxaldehyde (4.0 g, 37.2 mmol) under argon atmosphere. The reaction was stirred at room temperature for 24 h. The reaction mixture was filtered through a pad of Celite and the filter cake washed with in  $\text{CH}_2\text{Cl}_2$ . After the removal of solvent, the residue was purified by flash column chromatography ( $\text{CH}_2\text{Cl}_2/\text{EtOAc} = 3:1$ ) on silica gel to give the desired product as pale yellow oil. (4.9 g, 63% yield)

**Synthesis of *N*-sulfonamide.**<sup>2</sup> To a solution of *N*-sulfinylimine (4.9 g, 23.5 mmol) in THF (80 mL) at  $-78^\circ\text{C}$  was added dropwise alkylmagnesium chloride (35.3 mmol) under argon atmosphere. The reaction was stirred at  $-78^\circ\text{C}$  for 1 h. The reaction mixture was quenched by the addition of saturated aqueous  $\text{NH}_4\text{Cl}$  solution (50 mL) and extracted with EtOAc ( $3 \times 100$  mL). The combined organic layer was washed with brine (50 mL) and dried over  $\text{MgSO}_4$ . After the removal of solvent, the residue was purified by flash column chromatography (EtOAc/hexane= 1.5:1) on silica gel to give the crude product as yellow solid. The major diastereomer was separated by CombiFlash<sup>®</sup> Rf+ automated flash chromatography system (RediSep<sup>®</sup> Rf reversed phase C18 column, MeOH/ $\text{H}_2\text{O}$ ).

**Synthesis of amine dihydrochloride salt.** To a solution of *N*-sulfonamide (15.0 mmol) in MeOH (50 mL) was added 2N HCl in diethyl ether (22.5 mL, 45.0 mmol). The reaction was stirred at room temperature for 3 h. After the removal of solvent, the residue was triturated with diethyl ether. The resulting precipitate was filtered, washed with diethyl ether, and dried under vacuum to give the desired product as white solid (quantitative yield).

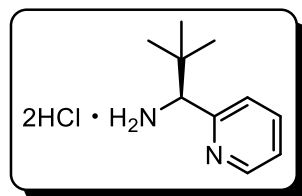

**(S)-2,2-dimethyl-1-(pyridin-2-yl)propan-1-amine dihydrochloride.** White solid.  $^1\text{H}$  NMR (400 MHz,  $\text{DMSO-}d_6$ )  $\delta$  8.65 (ddd,  $J = 4.8, 1.8, 0.9$  Hz, 1H), 8.33 (s, 3H), 7.88 (td,  $J = 7.8, 1.8$  Hz, 1H), 7.49 (dt,  $J = 7.8, 1.1$  Hz, 1H), 7.44 (ddd,  $J = 7.5, 4.8, 1.1$  Hz, 1H), 4.68 (br, 1H), 4.24 (q,  $J = 5.7$  Hz, 1H), 0.93 (s, 9H).  $^{13}\text{C}$  NMR (151 MHz,  $\text{DMSO-}d_6$ )  $\delta$  153.0, 145.6, 140.6, 125.3, 125.0, 61.2, 34.4, 26.3. HRMS (ESI $^+$ )  $m/z$  calcd. for  $[\text{C}_{10}\text{H}_{17}\text{N}_2]^+$ : 165.1386, found : 165.1390. e.e > 99%. The enantiomeric ratio was determined by HPLC analysis (after conversion to the acetamide by using AcCl and TEA) on Daicel Chiralcel OD-H,  $\text{Et}_2\text{NH}:\text{Hexane}:\text{iPrOH} = 0.1:95:5$ , flow rate 0.5 mL/min,  $\lambda = 254$  nm,  $t_{\text{R}} = 10.6$  min (*R*-isomer), 14.6 min (*S*-isomer).

#### Scheme S2. Procedure for Synthesis of 1a

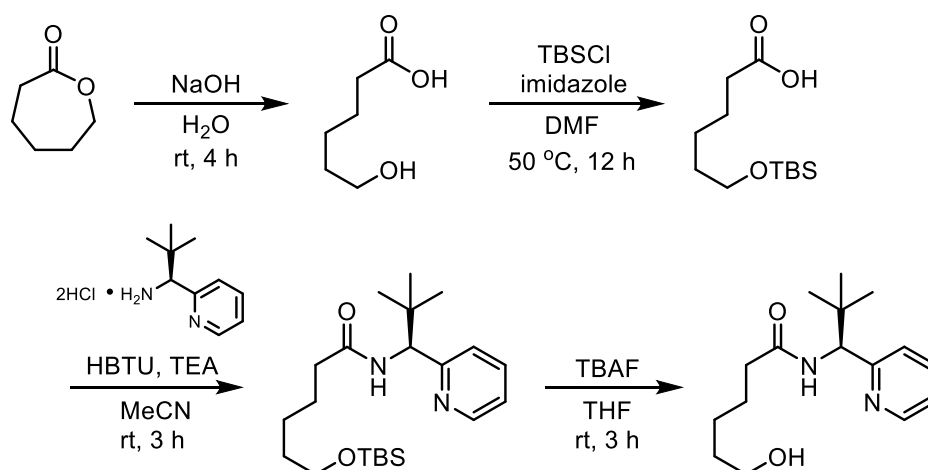

**Lactone hydrolysis.** To a solution of lactone (3.0 g, 26.3 mmol) in  $\text{H}_2\text{O}$  (100 mL) was added NaOH (2.1 g, 52.6 mmol). The reaction was stirred at room temperature for 4 h. The reaction mixture was acidified to pH 2.0 with 1N HCl aqueous solution and extracted with diethyl ether ( $3 \times 50$  mL). The combined organic layer was dried over  $\text{MgSO}_4$  and concentrated to give the desired product as white solid (3.3 g, 95% yield).

**TBS protection.** To a solution of 6-hydroxyhexanoic acid (3.3 g, 25.0 mmol) and imidazole (3.7 g, 55.0 mmol) in DMF (25 mL) was added *tert*-butyldimethylsilyl chloride (4.1 g, 27.5 mmol) under argon atmosphere. The reaction was stirred at 50 °C for 12 h. The reaction mixture was diluted with diethyl ether ( $3 \times 100$  mL) and washed with brine (50 mL). The combined organic layer was dried over  $\text{MgSO}_4$ . After the removal of solvent, the residue was purified by flash column chromatography

(EtOAc/hexane= 1:2) on silica gel to give the desired product as colorless oil (4.9 g, 80% yield).

**Amide bond formation.** To a solution of 6-((*tert*-butyldimethylsilyl)oxy)hexanoic acid (2.0 g, 8.1 mmol) and amine dihydrochloride salt (1.9 g, 8.1 mmol) in acetonitrile (40 mL) was added HBTU (3.2 g, 8.5 mmol) and trimethylamine (4.0 mL, 28.4 mmol). The reaction was stirred at room temperature for 3 h. The solvent was evaporated under vacuum. The reaction mixture was diluted with diethyl ether (3 × 50 mL) and washed with brine (50 mL). The combined organic layer was washed with saturated aqueous NaHCO<sub>3</sub> solution (3 × 50 mL) and dried over MgSO<sub>4</sub>. After the removal of solvent, the residue was purified by flash column chromatography (EtOAc/hexane= 1:2) on silica gel to give the desired product as pale yellow oil (2.3 g, 73% yield).

**TBS deprotection.** To a solution of (*S*)-6-((*tert*-butyldimethylsilyl)oxy)-*N*-(2,2-dimethyl-1-(pyridin-2-yl)propyl)hexanamide (2.3 g, 5.9 mmol) in THF (5 mL) was added tetrabutylammonium fluoride solution (1.0 M in THF, 17.6 mL, 17.6 mmol) under argon atmosphere. The reaction was stirred at room temperature for 5 h. The reaction mixture was diluted with CH<sub>2</sub>Cl<sub>2</sub> (3 × 50 mL) and washed with saturated aqueous NaHCO<sub>3</sub> solution (50 mL). The combined organic layer was dried over MgSO<sub>4</sub>. After the removal of solvent, the residue was purified by flash column chromatography (acetone/hexane= 1:1) on silica gel to give the desired product **1a** as white amorphous solid (1.4 g, 87% yield).

### Scheme S3. Procedure for Synthesis of substrates

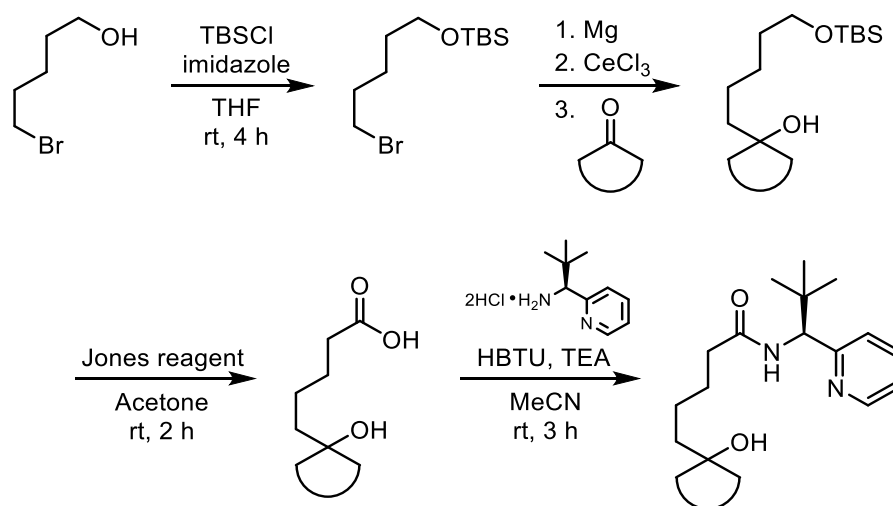

**TBS protection.** To a solution of imidazole (4.9 g, 71.8 mmol) in THF (60 mL) was added 5-bromopentan-1-ol (6.0 g, 35.9 mmol) and *tert*-butyldimethylsilyl chloride (6.5 g, 43.1 mmol) under argon atmosphere. The reaction was stirred at room temperature for 4 h. The reaction mixture was diluted with diethyl ether (3 × 70 mL) and washed with H<sub>2</sub>O (70 mL). The combined organic layer was dried over MgSO<sub>4</sub>. After the removal of solvent, the residue was purified by flash column chromatography (EtOAc/hexane= 1:10) on silica gel to give the desired product as colorless oil (8.1 g, 80% yield).

**1,2-addition of cyclic ketone.**<sup>3</sup> To a suspension of magnesium (0.3 g, 13.2 mmol) in diethyl ether (10 mL) was added ((5-bromopentyl)oxy)(*tert*-butyl)dimethylsilane (1.2 g, 4.4 mmol) in diethyl ether (5 mL) under argon atmosphere. The reaction was stirred at room temperature for 1 h to afford a solution of Grignard reagent. A suspension of flame-dried CeCl<sub>3</sub> (1.3 g, 5.3 mmol) in THF (10 mL) was stirred at room temperature for 3 h. To a suspension of CeCl<sub>3</sub> in THF was added dropwise a solution of Grignard reagent at 0 °C. The reaction was stirred at 0 °C for 1 h before a solution of cyclic ketone (1.8 mmol) in THF (3 mL) was added. After 1 h at 0 °C, the reaction mixture was quenched by the addition of H<sub>2</sub>O (1 mL). The reaction mixture was filtered through a pad of Celite and Na<sub>2</sub>SO<sub>4</sub> and the filter cake washed with in EtOAc. After the removal of solvent, the residue was purified by flash column chromatography on silica gel to give the desired product.

**Oxidation.**<sup>4</sup> To a solution of silyl ether (1.6 mmol) in acetone (20 mL) was added dropwise Jones reagent (2.0 M CrO<sub>3</sub> in aqueous H<sub>2</sub>SO<sub>4</sub>, 3.3 mmol) at -10 °C. The reaction was stirred at room temperature for 2 h. The reaction mixture was quenched by the addition of 2-propanol (5 mL). The reaction mixture was filtered through a pad of Celite and the filter cake washed with in acetone. After the removal of solvent, the residue diluted with saturated aqueous NaHCO<sub>3</sub> solution (3 × 30 mL) and washed with diethyl ether (30 mL). The aqueous layer was acidified to pH 2.0 with 1N HCl aqueous solution at 0 °C and extracted with EtOAc (3 × 50 mL). The combined organic layer was dried over MgSO<sub>4</sub> and concentrated to give the desired product.

**Amide bond formation.** To a solution of hydroxycarboxylic acid (1.5 mmol) and amine dihydrochloride salt (0.36 g, 1.5 mmol) in acetonitrile (6 mL) was added HBTU (0.6 g, 1.6 mmol) and trimethylamine (0.73 mL, 5.3 mmol). The reaction was stirred at room temperature for 3 h. The solvent was evaporated under vacuum. The reaction mixture was diluted with diethyl ether (3 × 50 mL) and washed with brine (50 mL). The combined organic layer was washed with saturated aqueous NaHCO<sub>3</sub> solution (3 × 50 mL) and dried over MgSO<sub>4</sub>. After the removal of solvent, the residue was purified by flash column chromatography (acetone/hexane) on silica gel to give the desired product.

**Scheme S4. Procedure for Synthesis of substrates 1d and 1e.**

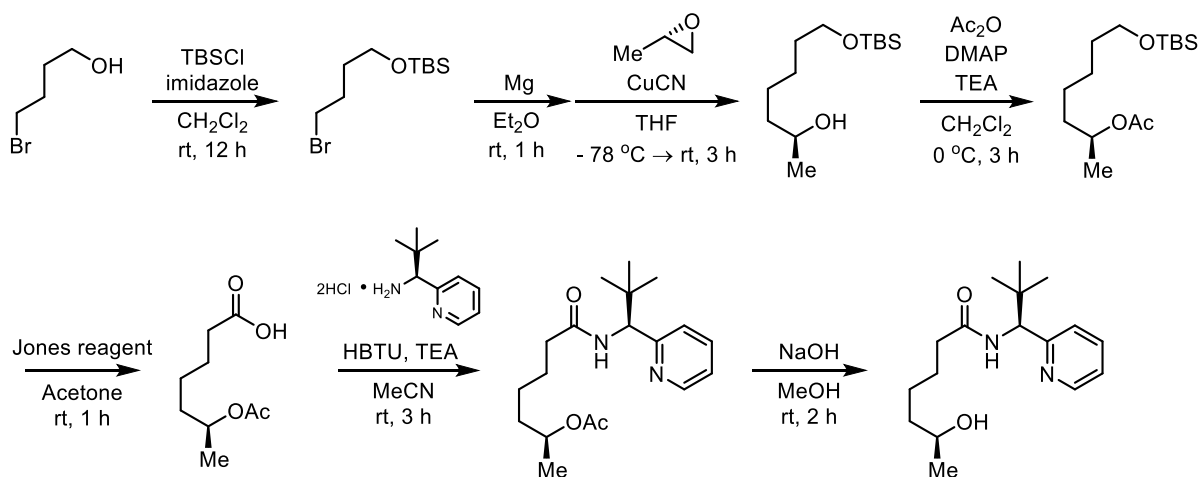

**TBS protection.** To a solution of imidazole (681 mg, 10.0 mmol) in  $\text{CH}_2\text{Cl}_2$  (30 mL) was added 4-bromobutan-1-ol (1.0 g, 6.7 mmol) and *tert*-butyldimethylsilyl chloride (1.2 g, 8.0 mmol) under argon atmosphere. The reaction was stirred at room temperature for 12 h. The reaction mixture was diluted with diethyl ether ( $3 \times 70$  mL) and washed with  $\text{H}_2\text{O}$  (70 mL). The combined organic layer was dried over  $\text{MgSO}_4$ . After the removal of solvent, the residue was purified by flash column chromatography (EtOAc/hexane = 1:10) on silica gel to give the desired product as colorless oil (1.5 g, 84% yield).

**Grignard reaction.** To a suspension of magnesium (137 mg, 5.6 mmol) in diethyl ether (3 mL) was added (4-bromobutoxy)(*tert*-butyl)dimethylsilane (600 mg, 2.2 mmol) in diethyl ether (2 mL) under argon atmosphere. The reaction was stirred at room temperature for 1 h to afford a solution of Grignard reagent. To a suspension of CuCN (9.1 mg, 0.1 mmol) in THF (2 mL) was added (*S*)-(-)-propylene oxide (118 mg, 2.0 mmol, (*R*)-(+)-propylene oxide for synthesis of **1d**) at  $-78$  °C. To a suspension of CuCN and (*S*)-(-)-propylene oxide in THF was added dropwise a solution of Grignard reagent at  $-78$  °C. After 3 h at  $-78$  °C, the reaction mixture was quenched by the addition of aqueous  $\text{NH}_4\text{Cl}$  solution (2 mL). The reaction mixture was diluted with diethyl ether ( $3 \times 20$  mL) and washed with  $\text{H}_2\text{O}$  (20 mL). The combined organic layer was dried over  $\text{MgSO}_4$ . After the removal of solvent, the residue was purified by flash column chromatography (EtOAc/hexane = 1:5) on silica gel to give the desired product (382 mg, 76% yield).

**Acetyl protection.** To a solution of alcohol (249 mg, 1.0 mmol), DMAP (24.4 mg, 0.2 mmol), and triethylamine (0.7 mL, 5.1 mmol) in  $\text{CH}_2\text{Cl}_2$  (10 mL) was added dropwise acetic anhydride (0.2 mL, 2.0 mmol) at  $0$  °C. The reaction was stirred at  $0$  °C for 3 h. After the removal of solvent, the reaction mixture was diluted with EtOAc ( $3 \times 20$  mL) and washed with saturated aqueous  $\text{NaHCO}_3$  (20 mL). The combined organic layer was dried over  $\text{MgSO}_4$ . After the removal of solvent, the residue was purified by flash column chromatography (EtOAc/hexane = 1:7) on silica gel to give the desired product (273 mg, 94% yield).

**Oxidation.** To a solution of silyl ether (273 mg, 0.95 mmol) in acetone (18 mL) was added dropwise

Jones reagent (2.0 M CrO<sub>3</sub> in aqueous H<sub>2</sub>SO<sub>4</sub>, 2.0 mmol) at -10 °C. The reaction was stirred at room temperature for 2 h. The reaction mixture was quenched by the addition of 2-propanol (5 mL). The reaction mixture was filtered through a pad of Celite and the filter cake washed with acetone. After the removal of solvent, the residue diluted with saturated aqueous NaHCO<sub>3</sub> solution (3 × 20 mL) and washed with diethyl ether (20 mL). The aqueous layer was acidified to pH 2.0 with 1N HCl aqueous solution at 0 °C and extracted with EtOAc (3 × 30 mL). The combined organic layer was dried over MgSO<sub>4</sub> and concentrated to give the desired product (169 mg, 94% yield).

**Amide bond formation.** To a solution of carboxylic acid (97 mg, 0.51 mmol) and amine dihydrochloride salt (122 mg, 0.51 mmol) in acetonitrile (3 mL) was added HBTU (203 mg, 0.54 mmol) and triethylamine (0.25 mL, 1.8 mmol). The reaction was stirred at room temperature for 3 h. The solvent was evaporated under vacuum. The reaction mixture was diluted with diethyl ether (3 × 30 mL) and washed with brine (20 mL). The combined organic layer was washed with saturated aqueous NaHCO<sub>3</sub> solution (3 × 20 mL) and dried over MgSO<sub>4</sub>. After the removal of solvent, the residue was purified by flash column chromatography (EtOAc/hexane = 1:1) on silica gel to give the desired product (142 mg, 83% yield).

**Acetyl deprotection.** To a solution of acetate (142 mg, 0.42 mmol) in MeOH (1 mL) was added NaOH (2.0 M in H<sub>2</sub>O, 0.42 mL) at room temperature. The reaction was stirred at room temperature for 2 h. The reaction mixture was diluted with CH<sub>2</sub>Cl<sub>2</sub> (3 × 20 mL) and washed with brine (20 mL). The combined organic layer was dried over MgSO<sub>4</sub>. After the removal of solvent, the residue was purified by flash column chromatography (acetone/hexane = 1:1) on silica gel to give the desired product (122 mg, quantitative yield).

#### Scheme S5. General Procedure for Stereoselective Intramolecular C(sp<sup>3</sup>)-O Bond Formation

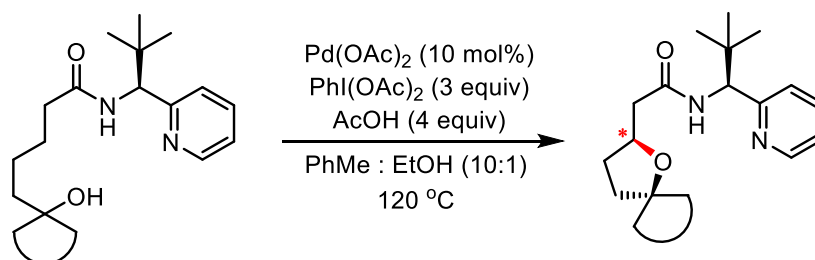

Substrate (0.1 mmol), Pd(OAc)<sub>2</sub> (2.2 mg, 10 mol%), PhI(OAc)<sub>2</sub> (96.6 mg, 3.0 equiv), and AcOH (24.0 mg, 4.0 equiv) were combined in PhMe and EtOH (10 : 1, 1.0 mL) under argon atmosphere (balloon). The reaction was stirred at 120 °C for 6 – 18 h. The mixture was monitored by TLC using acetone/hexane (1:3) as the mobile phase. The reaction mixture was diluted with CH<sub>2</sub>Cl<sub>2</sub> (3 × 25 mL) and washed with saturated aqueous NaHCO<sub>3</sub> solution (30 mL).

**Determining Diastereomeric Ratios:** The organic layer was dried over MgSO<sub>4</sub> and filtered through a



short column chromatography on silica gel. The crude mixtures were collected and subjected for the determination of diastereomeric ratio by HPLC analysis (EC-C18 column, 4.6 × 50 mm or 4.6 × 150 mm,  $\lambda = 254$  nm).

**Purification:** After the removal of solvent, the residue was purified by flash column chromatography (acetone/hexane or CH<sub>2</sub>Cl<sub>2</sub>/MeOH, indicated below) on silica gel to give the desired product.

### Scheme S6. Procedure for Cleavage of Chiral Bidentate Auxiliary

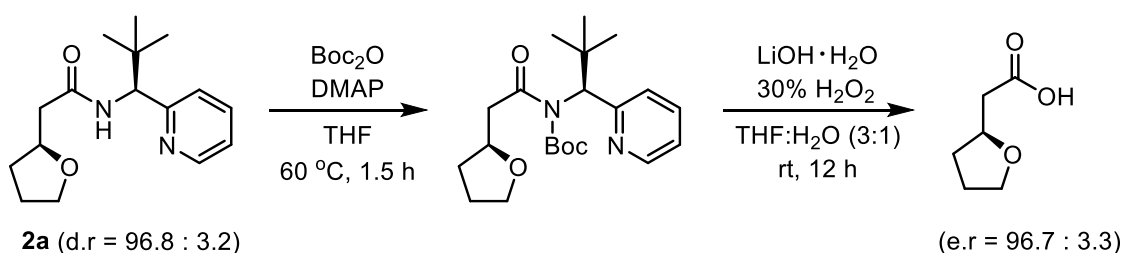

To a solution of **2a** (33.2 mg, 0.12 mmol) and DMAP (22.0 mg, 0.18 mmol) in THF (1.5 mL) was added dropwise Boc<sub>2</sub>O (0.17 mL, 0.72 mmol) under argon atmosphere. The reaction was stirred at 80 °C for 1.5 h. After the removal of solvent, the residue was purified by flash column chromatography (acetone/hexane= 1:3) on silica gel to give the desired product as yellow solid (43.9 mg, 97% yield). To a solution of N-Boc imide (43.9 mg, 0.117 mmol) and 30% H<sub>2</sub>O<sub>2</sub> (0.27 mL) in THF/H<sub>2</sub>O (3:1, 1.2 mL) was added LiOH·H<sub>2</sub>O (48.9 mg, 1.17 mmol) at 0 °C. The reaction was stirred at room temperature for 12 h and quenched by the addition of saturated aqueous Na<sub>2</sub>SO<sub>3</sub> solution. The reaction mixture was basified with 1N NaOH aqueous solution and washed with EtOAc. The aqueous layer was acidified to pH 2.0 with 1N HCl aqueous solution and extracted with EtOAc (3 × 20 mL). The combined organic layer was dried over MgSO<sub>4</sub>. After the removal of solvent, the residue was purified by flash column chromatography (DCM/MeOH= 12:1) on silica gel to give the desired product as colorless oil (10.8 mg, 71% yield, e.r = 96.7:3.3). The enantiomeric ratio was determined by HPLC analysis (after conversion to the benzyl ester by using BnOH, DMAP, and DCC) on Daicel Chiralcel OJ-H, Hexane:*i*PrOH = 80:20, flow rate 1.0 mL/min,  $\lambda = 254$  nm,  $t_R = 7.7$  min (minor), 8.2 min (major).<sup>5</sup>

### Procedure for Synthesis of DGAT inhibitor 6.

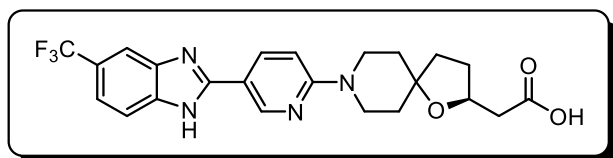

**Cleavage of chiral bidentate auxiliary.** To a solution of **2o** (116 mg, 0.26 mmol) and DMAP (47 mg, 0.40 mmol) in THF (4.0 mL) was added dropwise Boc<sub>2</sub>O (0.36 mL, 1.55 mmol) under argon atmosphere. The reaction was stirred at 80 °C for 5 h. After the removal of solvent, the residue was purified by flash

column chromatography (EtOAc/hexanes = 1:4) on silica gel to give the desired product. To a solution of *N*-Boc imide and 30% H<sub>2</sub>O<sub>2</sub> (0.7 mL) in THF + H<sub>2</sub>O (3:1, 3.0 mL) was added LiOH·H<sub>2</sub>O (107 mg, 2.6 mmol) at 0 °C. The reaction was stirred at room temperature for 12 h and quenched by the addition of saturated aqueous Na<sub>2</sub>SO<sub>3</sub> solution. The reaction mixture was basified with 1N NaOH aqueous solution and washed with EtOAc. The aqueous layer was acidified to pH 2.0 with 1N HCl aqueous solution and extracted with EtOAc (3 × 20 mL). The combined organic layer was dried over MgSO<sub>4</sub>. After the removal of solvent, the residue was purified by flash column chromatography (CH<sub>2</sub>Cl<sub>2</sub>/MeOH = 15:1) on silica gel to give the desired product as colorless oil (61 mg, 78%, overall yield).

**Synthesis of (*S*)-2-(8-(5-(5-(trifluoromethyl)-1*H*-benzo[*d*]imidazol-2-yl)pyridin-2-yl)-1-oxa-8-azaspiro[4.5]decan-2-yl)acetic acid (6).** To a solution of *N*-Boc protected acid (30.3 mg, 0.10 mmol) in CH<sub>2</sub>Cl<sub>2</sub> (1 mL) was added dropwise trimethylsilyldiazomethane (2.0 M in hexanes, 0.13 mL) at 0 °C. The reaction was stirred at 0 °C for 3 h. The reaction mixture was diluted with CH<sub>2</sub>Cl<sub>2</sub> (3 × 10 mL) and washed with H<sub>2</sub>O (6 mL). The combined organic layer was dried over MgSO<sub>4</sub>. After the removal of solvent, the residue was purified by flash column chromatography (EtOAc/hexane = 1:3) on silica gel to give the desired product as yellow oil (29.1 mg, 93% yield). To a solution of *N*-Boc protected methyl ester (15.2 mg, 0.048 mmol) in CH<sub>2</sub>Cl<sub>2</sub> (0.5 mL) was added trifluoroacetic acid (0.15 mL) at room temperature. The reaction was stirred at room temperature for 1 h. After the removal of solvent, the brown residue was directly used for the next step without further purification. To a solution of TFA amine salt (15.6 mg, 0.048 mmol) in NMP (0.5 mL) was added 2-(6-fluoropyridin-3-yl)-5-(trifluoromethyl)-1*H*-benzo[*d*]imidazole (13.4 mg, 0.048 mmol) and NaHCO<sub>3</sub> (40.3 mg, 0.48 mmol) at room temperature. The reaction was stirred at 110 °C for 4 h. The reaction mixture was diluted with EtOAc (3 × 10 mL) and washed with brine (10 mL). The combined organic layer was dried over MgSO<sub>4</sub>. After the removal of solvent, the residue was purified by flash column chromatography (acetone/hexane = 1:2) on silica gel to give the desired product as light yellow solid (18.7 mg, 82% yield). To a solution of methyl ester (17.5 mg, 0.037 mmol) in THF, H<sub>2</sub>O, and MeOH (1:1:1, 0.5 mL) was added LiOH·H<sub>2</sub>O (7.7 mg, 0.19 mmol) at room temperature. The reaction was stirred at room temperature for 2.5 h. The reaction mixture was acidified to pH 2.0 with 1N HCl aqueous solution and extracted with EtOAc (3 × 40 mL). The combined organic layer was dried over MgSO<sub>4</sub>. After the removal of solvent, the residue was purified by flash column chromatography (CH<sub>2</sub>Cl<sub>2</sub>/MeOH = 15:1 to 5:1) on silica gel to give the desired product as white solid (14.8 mg, 88% yield). <sup>1</sup>H NMR (400 MHz, Methanol-*d*<sub>4</sub>) δ 8.82 (d, *J* = 2.6 Hz, 1H), 8.17 (dd, *J* = 9.1, 2.6 Hz, 1H), 7.84 (s, 1H), 7.68 (d, *J* = 8.4 Hz, 1H), 7.51 (d, *J* = 8.4 Hz, 1H), 6.96 (d, *J* = 9.1 Hz, 1H), 4.40 (p, *J* = 6.9 Hz, 1H), 3.95 – 3.84 (m, 2H), 3.72 – 3.61 (m, 2H), 2.57 (dd, *J* = 15.0, 6.9 Hz, 1H), 2.50 (dd, *J* = 15.0, 6.9 Hz, 1H), 2.24 – 2.14 (m, 1H), 1.93 – 1.82 (m, 2H), 1.82 – 1.63 (m, 5H). HRMS (ESI<sup>+</sup>) *m/z* calcd. for [C<sub>23</sub>H<sub>24</sub>F<sub>3</sub>N<sub>4</sub>O<sub>3</sub>]<sup>+</sup>: 461.1795, found: 461.1800. *e.r.* = 13:1. The enantiomeric ratio was determined by HPLC analysis on Daicel Chiralpak IA, hexanes:EtOH = 65:35, flow rate 0.5 mL/min, λ = 254 nm, *t<sub>R</sub>* = 10.9 min ((*S*)-isomer), 13.0 min ((*R*)-isomer).

### III. Optimization Study

Table S1. Additive Screening<sup>a</sup>

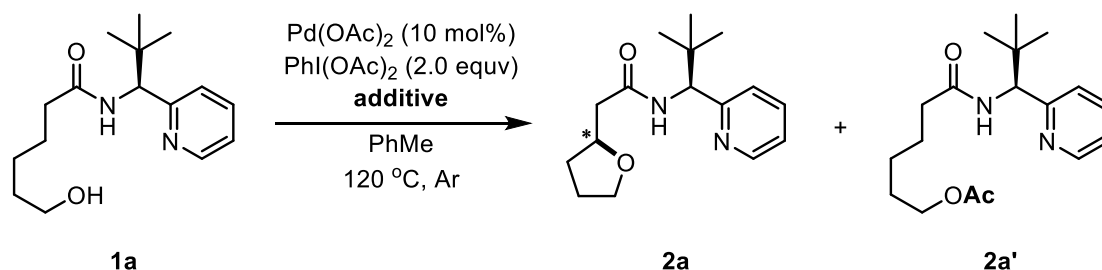

| entry | additive (equiv)                           | <b>2a</b> % (d.r.) | <b>2a'</b> % |
|-------|--------------------------------------------|--------------------|--------------|
| 1     | -                                          | 46 (8.3 : 1)       |              |
| 2     | AcOH (0.2)                                 | 41 (8.1 : 1)       | 12           |
| 3     | AcOH (1)                                   | 47 (10.4 : 1)      | 11           |
| 4     | AcOH (2)                                   | 49 (14.3 : 1)      | 11           |
| 5     | AcOH (4)                                   | 63 (26.1 : 1)      | 11           |
| 6     | AcOH (8)                                   | 61 (32.2 : 1)      | 11           |
| 7     | AcOH (20)                                  | 51 (33.1 : 1)      | 12           |
| 8     | AcOH (50)                                  | 33                 | 23           |
| 9     | PivOH (4)                                  | 58 (23 : 1)        | 8            |
| 10    | $(\text{BnO})_2\text{PO}_2\text{H}$ (2)    | NR                 |              |
| 11    | Ac-Gly-OH (2)                              | 35                 | 11           |
| 12    | $\text{TsOH} \cdot \text{H}_2\text{O}$ (2) | trace              |              |
| 13    | $\text{Ag}_2\text{CO}_3$ (2)               | 33 (5.8 : 1)       | 6            |
| 14    | $\text{AgOAc}$ (2)                         | 39 (6.7 : 1)       | 16           |
| 15    | $\text{LiOAc}$ (2)                         | 35 (7.5 : 1)       | 25           |

<sup>a</sup> Conditions: Substrate (0.1 mmol),  $\text{Pd}(\text{OAc})_2$  (10 mol%),  $\text{PhI}(\text{OAc})_2$  (2.0 equiv), additive in  $\text{PhMe}$  (1.0 mL) at  $120\text{ }^\circ\text{C}$  for 12 h. The d.r. was determined by HPLC analysis. NR = no reaction

Table S2. Oxidant Screening<sup>a</sup>

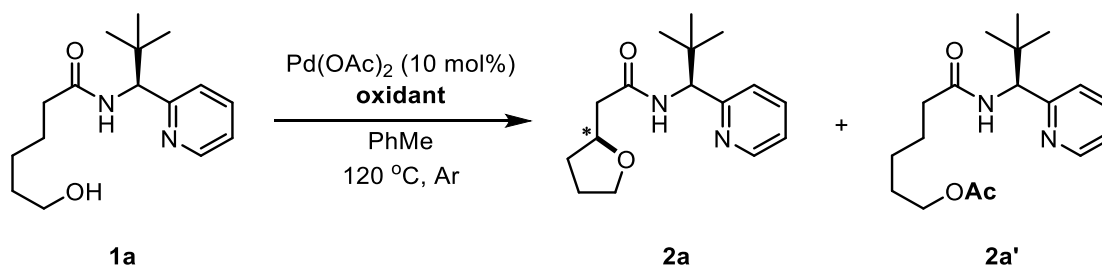

| entry | oxidant (equiv) | <b>2a</b> % (d.r.) | <b>2a'</b> % |
|-------|-----------------|--------------------|--------------|
|-------|-----------------|--------------------|--------------|

|    |                                                                                       |              |    |
|----|---------------------------------------------------------------------------------------|--------------|----|
| 1  | PhI(OAc) <sub>2</sub> (2)                                                             | 46 (8.3 : 1) | 16 |
| 2  | PhI(OPiv) <sub>2</sub> (2)                                                            | 39           | 10 |
| 3  | PhI(TFA) <sub>2</sub> (2)                                                             | NR           |    |
| 4  | PhITs(OH) (2)                                                                         | NR           |    |
| 5  |  (2) | 28           | 25 |
| 6  | oxone (2)                                                                             | NR           |    |
| 7  | K <sub>2</sub> S <sub>2</sub> O <sub>8</sub> (2)                                      | NR           |    |
| 8  | NaIO <sub>4</sub> (2)                                                                 | NR           |    |
| 9  | NaIO <sub>4</sub> (2)                                                                 | NR           |    |
| 10 | NaIO <sub>4</sub> (2) / Ac <sub>2</sub> O (10)                                        | NR           | 40 |
| 11 | DMP (2)                                                                               | NR           |    |
| 12 | DDQ (2)                                                                               | NR           |    |
| 13 | Selectfluor (2)                                                                       | NR           |    |
| 14 | Ce(SO <sub>4</sub> ) <sub>2</sub> (2)                                                 | NR           |    |

<sup>a</sup> Conditions: Substrate (0.1 mmol), Pd(OAc)<sub>2</sub> (10 mol%), oxidant in PhMe (1.0 mL) at 120 °C for 12 h. The d.r. was determined by HPLC analysis. NR = no reaction

**Table S3. Co-solvent Screening<sup>a</sup>**

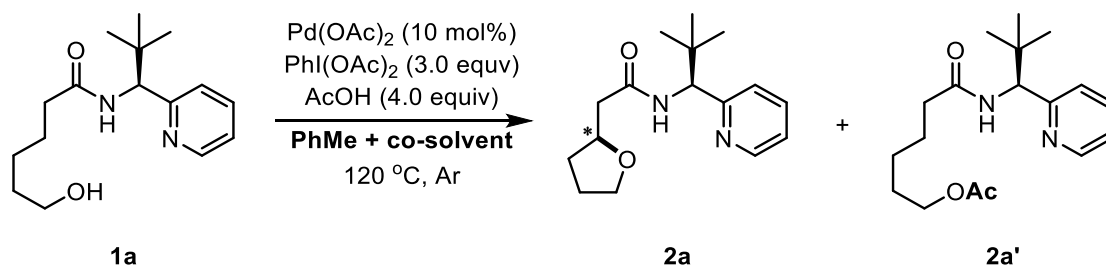

| entry | (co)solvent (v/v)    | <b>2a</b> % (d.r.) | <b>2a'</b> % |
|-------|----------------------|--------------------|--------------|
| 1     | PhMe                 | 63 (26 : 1)        | 5            |
| 2     | PhMe + EtOH (5:1)    | 66 (27 : 1)        | 6            |
| 3     | PhMe + EtOH (10:1)   | 71 (31 : 1)        | 4            |
| 4     | PhMe + EtOH (20:1)   | 67 (29 : 1)        | 7            |
| 5     | PhMe + 1,2-DCE (5:1) | 49                 | 16           |
| 6     | PhMe + DMF (5:1)     | 44                 | 9            |
| 7     | PhMe + dioxane (5:1) | 53                 | 14           |

|    |                            |    |    |
|----|----------------------------|----|----|
| 8  | PhMe + HFIP (5:1)          | 31 | 1  |
| 9  | PhMe + EtOAc (5:1)         | 54 | 18 |
| 10 | PhMe + MeCN (5:1)          | 36 | 12 |
| 11 | PhMe + DMSO (5:1)          | 28 | 8  |
| 12 | PhMe + <i>n</i> PrOH (5:1) | 59 | 10 |
| 13 | PhMe + <i>n</i> BuOH (5:1) | 60 | 9  |

<sup>a</sup> Conditions: Substrate (0.1 mmol), Pd(OAc)<sub>2</sub> (10 mol%), PhI(OAc)<sub>2</sub> (2.0 equiv), AcOH (8.0 equiv) in co-solvent (1.0 mL) at 120 °C for 6 h. The d.r. was determined by HPLC analysis.

### Kinetic isotope effect (KIE) Studies

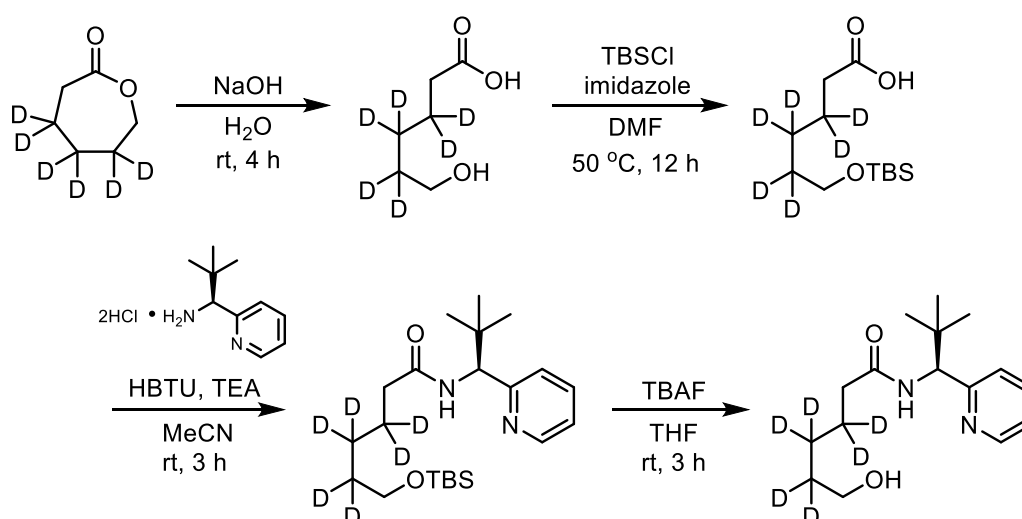

**Lactone hydrolysis.** To a solution of  $\epsilon$ -caprolactone-3,3,4,4,5,5-*d*<sub>6</sub> (CAS No. 1219802-08-0, purchased from C/D/N Isotope Inc., 500 mg, 4.16 mmol) in H<sub>2</sub>O (15 mL) was added NaOH (333 mg, 8.32 mmol). The reaction was stirred at room temperature for 4 h. The reaction mixture was acidified to pH 2.0 with 1N HCl aqueous solution and extracted with diethyl ether (3 × 20 mL). The combined organic layer was dried over MgSO<sub>4</sub> and concentrated to give the desired product as white solid (557 mg, 97% yield).

**TBS protection.** To a solution of 6-hydroxyhexanoic acid (400 mg, 2.92 mmol) and imidazole (437 mg, 6.42 mmol) in DMF (10 mL) was added *tert*-butyldimethylsilyl chloride (484 mg, 3.21 mmol) under argon atmosphere. The reaction was stirred at 50 °C for 12 h. The reaction mixture was diluted with diethyl ether (3 × 15 mL) and washed with brine (10 mL). The combined organic layer was dried over MgSO<sub>4</sub>. After the removal of solvent, the residue was purified by flash column chromatography (EtOAc/hexane= 1:2) on silica gel to give the desired product as colorless oil (567 mg, 77% yield).

**Amide bond formation.** To a solution of 6-((*tert*-butyldimethylsilyl)oxy)hexanoic acid (567 mg, 2.25 mmol) and amine dihydrochloride salt (533 mg, 2.25 mmol) in acetonitrile (11 mL) was added HBTU (894 mg, 2.36 mmol) and trimethylamine (1.1 mL, 7.86 mmol). The reaction was stirred at room temperature for 3 h. The solvent was evaporated under vacuum. The reaction mixture was diluted with diethyl ether (3 × 15 mL) and washed with brine (10 mL). The combined organic layer was washed with saturated aqueous NaHCO<sub>3</sub> solution (3 × 10 mL) and dried over MgSO<sub>4</sub>. After the removal of solvent, the residue was purified by flash column chromatography (EtOAc/hexane= 1:2) on silica gel to give the desired product as pale yellow oil (777 mg, 87% yield).

**TBS deprotection.** To a solution of (*S*)-6-((*tert*-butyldimethylsilyl)oxy)-*N*-(2,2-dimethyl-1-(pyridin-2-yl)propyl)hexanamide (777 mg, 1.95 mmol) in THF (2 mL) was added tetrabutylammonium fluoride solution (1.0 M in THF, 4.87 mL, 4.87 mmol) under argon atmosphere. The reaction was stirred at room temperature for 5 h. The reaction mixture was diluted with CH<sub>2</sub>Cl<sub>2</sub> (3 × 15 mL) and washed with saturated aqueous NaHCO<sub>3</sub> solution (10 mL). The combined organic layer was dried over MgSO<sub>4</sub>. After the removal of solvent, the residue was purified by flash column chromatography (acetone/hexane= 1:1) on silica gel to give the desired product **1a-d<sub>6</sub>** as white amorphous solid (500 mg, 90% yield).

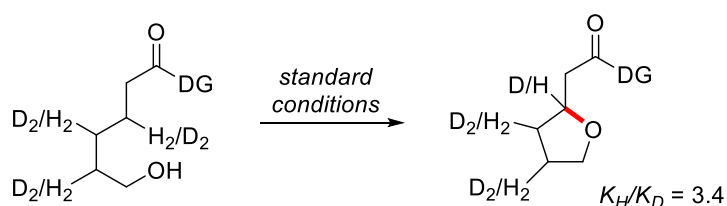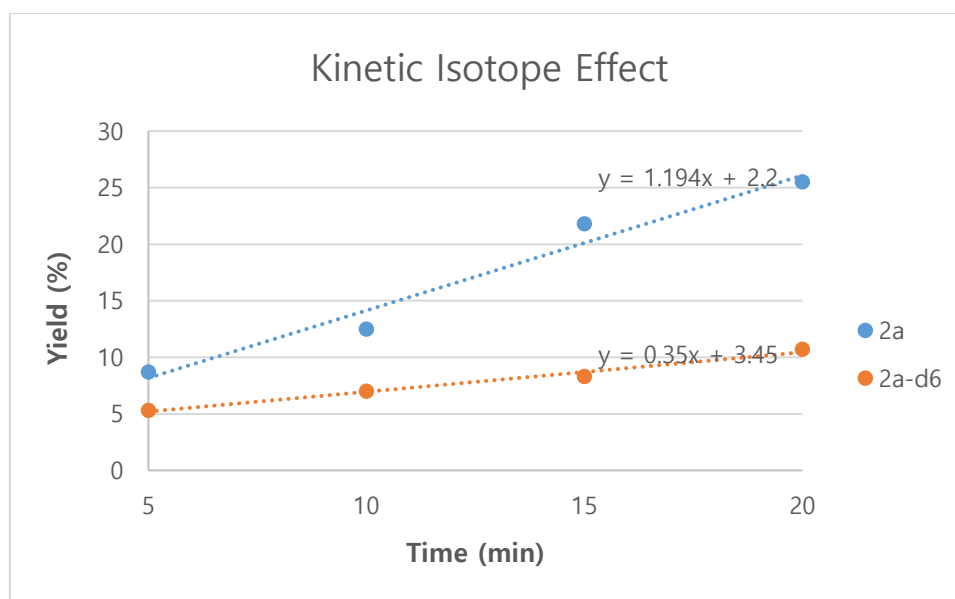

#### IV. Compound Characterizations

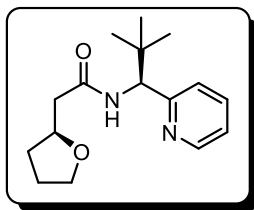

***N*-((*S*)-2,2-dimethyl-1-(pyridin-2-yl)propyl)-2-((*S*)-tetrahydrofuran-2-yl)acetamide (2a).**

Monitored by TLC using acetone:hexanes = 1:2 ( $R_f$  = 0.3) as the mobile phase and purified with flash column chromatography (acetone:hexanes = 1:2). From **1a** (27.8 mg, 0.1 mmol), compound **2a** (18.4 mg, 71%) was obtained. mp 76-78 °C. White solid.  $^1\text{H}$  NMR (400 MHz,  $\text{DMSO}-d_6$ )  $\delta$  8.52 (ddd,  $J$  = 4.8, 1.8, 0.9 Hz, 1H), 8.09 (d,  $J$  = 9.7 Hz, 1H), 7.73 (td,  $J$  = 7.9, 1.8 Hz, 1H), 7.34 (dt,  $J$  = 7.9, 1.1 Hz, 1H), 7.25 (ddd,  $J$  = 7.5, 4.8, 1.1 Hz, 1H), 4.85 (d,  $J$  = 9.7 Hz, 1H), 4.03 (p,  $J$  = 6.7 Hz, 1H), 3.76 – 3.69 (m, 1H), 3.59 – 3.52 (m, 1H), 2.44 (dd,  $J$  = 13.8, 6.7 Hz, 1H), 2.38 (dd,  $J$  = 13.8, 6.7 Hz, 1H), 1.94 – 1.73 (m, 3H), 1.55 – 1.45 (m, 1H), 0.86 (s, 9H).  $^{13}\text{C}$  NMR (151 MHz,  $\text{DMSO}-d_6$ )  $\delta$  169.3, 159.6, 148.1, 135.8, 123.2, 122.0, 75.8, 66.8, 61.2, 41.5, 35.0, 30.6, 26.7, 25.0. HRMS (ESI $^+$ )  $m/z$  calcd. for  $[\text{C}_{16}\text{H}_{24}\text{N}_2\text{NaO}_2]^+$ : 299.1730, found : 299.1743. d.r = 30:1. The diastereomeric ratio was determined by HPLC analysis on C18 column 4.6  $\times$  50 mm, TFA:MeOH:H $_2$ O = 0.1:2:98 to 0.1:50:50 gradient in 90 min, flow rate 0.5 mL/min,  $\lambda$  = 254 nm,  $t_R$  = 36.3 min (minor), 37.0 min (major).

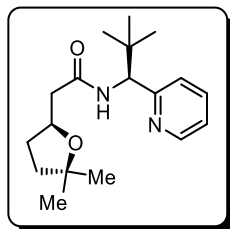

***N*-((*S*)-2,2-dimethyl-1-(pyridin-2-yl)propyl)-2-((*S*)-5,5-dimethyltetrahydrofuran-2-yl)acetamide**

**(2b).** Monitored by TLC using acetone:hexanes = 1:3 ( $R_f$  = 0.4) as the mobile phase and purified with flash column chromatography (acetone:hexanes = 1:4). From **1b** (30.6 mg, 0.1 mmol), compound **2b** (23.2 mg, 76%) was obtained. Yellow oil.  $^1\text{H}$  NMR (400 MHz,  $\text{DMSO}-d_6$ )  $\delta$  8.51 (ddd,  $J$  = 4.8, 1.9, 0.9 Hz, 1H), 8.09 (d,  $J$  = 9.6 Hz, 1H), 7.72 (td,  $J$  = 7.7, 1.9 Hz, 1H), 7.33 (dt,  $J$  = 7.7, 1.1 Hz, 1H), 7.25 (ddd,  $J$  = 7.5, 4.8, 1.1 Hz, 1H), 4.83 (d,  $J$  = 9.6 Hz, 1H), 4.14 (p,  $J$  = 6.4 Hz, 1H), 2.42 (dd,  $J$  = 13.8, 6.6 Hz, 1H), 2.36 (dd,  $J$  = 13.8, 6.6 Hz, 1H), 2.03 – 1.89 (m, 1H), 1.77 – 1.57 (m, 3H), 1.18 (s, 3H), 1.12 (s, 3H), 0.86 (s, 9H).  $^{13}\text{C}$  NMR (101 MHz,  $\text{DMSO}-d_6$ )  $\delta$  169.4, 159.7, 148.1, 135.8, 123.2, 122.0, 80.1, 75.1, 61.2, 42.5, 37.8, 35.0, 31.2, 29.2, 28.0, 26.7. HRMS (ESI $^+$ )  $m/z$  calcd. for  $[\text{C}_{18}\text{H}_{28}\text{N}_2\text{NaO}_2]^+$ : 327.2043, found : 327.2066. d.r = 15:1. The diastereomeric ratio was determined by  $^1\text{H}$  NMR analysis.

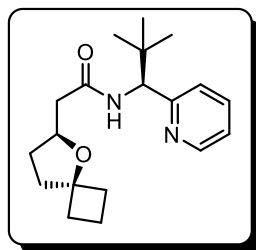

***N*-((*S*)-2,2-dimethyl-1-(pyridin-2-yl)propyl)-2-((*S*)-5-oxaspiro[3.4]octan-6-yl)acetamide (2c).**

Monitored by TLC using acetone:hexanes = 1:3 ( $R_f$  = 0.3) as the mobile phase and purified with flash column chromatography (acetone:hexanes = 1:3). From **1c** (31.8 mg, 0.1 mmol), compound **2c** (20.7 mg, 66%) was obtained. Yellow oil.  $^1\text{H}$  NMR (400 MHz, DMSO- $d_6$ )  $\delta$  8.51 (ddd,  $J$  = 4.8, 1.9, 0.9 Hz, 1H), 8.09 (d,  $J$  = 9.7 Hz, 1H), 7.73 (td,  $J$  = 7.9, 1.9 Hz, 1H), 7.34 (dt,  $J$  = 7.9, 1.1 Hz, 1H), 7.26 (ddd,  $J$  = 7.5, 4.8, 1.1 Hz, 1H), 4.83 (d,  $J$  = 9.7 Hz, 1H), 4.09 (p,  $J$  = 6.7 Hz, 1H), 2.40 (dd,  $J$  = 13.8, 6.7 Hz, 1H), 2.34 (dd,  $J$  = 13.8, 6.7 Hz, 1H), 2.05 (dq,  $J$  = 19.6, 10.1 Hz, 2H), 1.98 – 1.82 (m, 5H), 1.63 – 1.51 (m, 2H), 1.50 – 1.41 (m, 1H), 0.86 (s, 9H).  $^{13}\text{C}$  NMR (151 MHz, DMSO- $d_6$ )  $\delta$  169.3, 159.6, 148.1, 135.8, 123.2, 122.0, 82.4, 75.3, 61.2, 42.5, 36.0, 35.9, 35.6, 35.0, 30.1, 26.7, 12.2. HRMS (ESI $^+$ )  $m/z$  calcd. for  $[\text{C}_{19}\text{H}_{28}\text{N}_2\text{NaO}_2]^+$  : 339.2043, found : 339.2087. d.r = 17:1. The diastereomeric ratio was determined by HPLC analysis on C18 column 4.6  $\times$  150 mm, TFA:MeOH:H $_2$ O = 0.1:65:35, flow rate 0.5 mL/min,  $\lambda$  = 254 nm,  $t_R$  = 5.9 min (minor), 5.6 min (major).

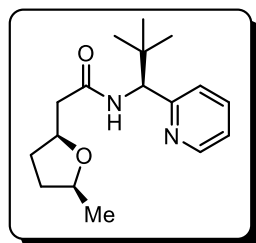

***N*-((*S*)-2,2-dimethyl-1-(pyridin-2-yl)propyl)-2-((2*S*,5*S*)-5-methyltetrahydrofuran-2-yl)acetamide (2d).**

Monitored by TLC using acetone:hexanes = 1:3 ( $R_f$  = 0.3) as the mobile phase and purified with flash column chromatography (acetone:hexanes = 1:3). From **1d** (29.2 mg, 0.1 mmol), compound **2d** (21.3 mg, 73%) was obtained. Yellow oil.  $^1\text{H}$  NMR (400 MHz, DMSO- $d_6$ )  $\delta$  8.51 (ddd,  $J$  = 4.8, 1.9, 0.9 Hz, 1H), 8.09 (d,  $J$  = 9.6 Hz, 1H), 7.72 (td,  $J$  = 7.7, 1.9 Hz, 1H), 7.34 (dt,  $J$  = 7.7, 1.1 Hz, 1H), 7.25 (ddd,  $J$  = 7.5, 4.8, 1.1 Hz, 1H), 4.84 (d,  $J$  = 9.6 Hz, 1H), 4.01 (p,  $J$  = 6.6 Hz, 1H), 3.87 – 3.75 (m, 1H), 2.45 (dd,  $J$  = 13.9, 6.8 Hz, 1H), 2.39 (dd,  $J$  = 13.9, 6.8 Hz, 1H), 1.97 – 1.83 (m, 2H), 1.63 – 1.53 (m, 1H), 1.45 – 1.34 (m, 1H), 1.13 (d,  $J$  = 6.0 Hz, 3H), 0.86 (s, 9H).  $^{13}\text{C}$  NMR (101 MHz, DMSO- $d_6$ )  $\delta$  169.3, 159.6, 148.1, 135.8, 123.2, 122.0, 75.8, 74.6, 61.2, 42.1, 35.0, 32.3, 30.6, 26.7, 21.3. HRMS (ESI $^+$ )  $m/z$  calcd. for  $[\text{C}_{17}\text{H}_{26}\text{N}_2\text{NaO}_2]^+$  : 313.1886, found : 313.1891. d.r = 20:1. The diastereomeric ratio was determined by HPLC analysis on C18 column 4.6  $\times$  150 mm, TFA:MeOH:H $_2$ O = 0.1:30:70, flow rate 0.5 mL/min,  $\lambda$  = 254 nm,  $t_R$  = 28.3 min (minor), 29.7 min (major).



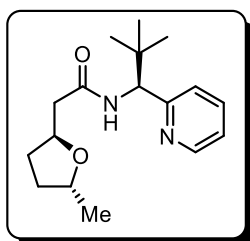

***N*-((*S*)-2,2-dimethyl-1-(pyridin-2-yl)propyl)-2-((2*S*,5*R*)-5-methyltetrahydrofuran-2-yl)acetamide (**2e**).** Monitored by TLC using acetone:hexanes = 1:3 ( $R_f = 0.3$ ) as the mobile phase and purified with flash column chromatography (acetone:hexanes = 1:3). From **1e** (29.2 mg, 0.1 mmol), compound **2e** (19.2 mg, 67%) was obtained. Yellow oil.  $^1\text{H NMR}$  (400 MHz,  $\text{DMSO-}d_6$ )  $\delta$  8.51 (ddd,  $J = 4.8, 1.9, 0.8$  Hz, 1H), 8.08 (d,  $J = 9.6$  Hz, 1H), 7.72 (td,  $J = 7.6, 1.9$  Hz, 1H), 7.34 (dt,  $J = 7.6, 1.1$  Hz, 1H), 7.25 (ddd,  $J = 7.5, 4.8, 1.1$  Hz, 1H), 4.84 (d,  $J = 9.6$  Hz, 1H), 4.19 (p,  $J = 6.7$  Hz, 1H), 4.08 – 3.95 (m, 1H), 2.41 (dd,  $J = 13.8, 6.7$  Hz, 1H), 2.35 (dd,  $J = 13.8, 6.7$  Hz, 1H), 2.09 – 1.90 (m, 2H), 1.63 – 1.49 (m, 1H), 1.44 – 1.30 (m, 1H), 1.08 (d,  $J = 6.1$  Hz, 3H), 0.86 (s, 9H).  $^{13}\text{C NMR}$  (151 MHz,  $\text{DMSO-}d_6$ )  $\delta$  169.4, 159.7, 148.1, 135.8, 123.2, 122.0, 75.1, 73.7, 61.2, 41.9, 35.0, 33.1, 31.4, 26.7, 21.2. HRMS (ESI<sup>+</sup>)  $m/z$  calcd. for  $[\text{C}_{17}\text{H}_{26}\text{N}_2\text{NaO}_2]^+$  : 313.1886, found : 313.1910. d.r = 19:1. The diastereomeric ratio was determined by HPLC analysis on C18 column  $4.6 \times 150$  mm, TFA:MeOH:H<sub>2</sub>O = 0.1:30:70, flow rate 0.5 mL/min,  $\lambda = 254$  nm,  $t_R = 30.5$  min (minor), 27.4 min (major).

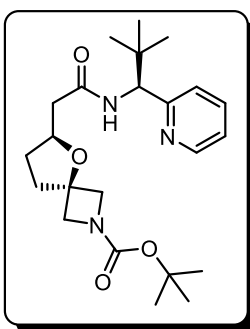

***tert*-butyl (*S*)-6-(2-(((*S*)-2,2-dimethyl-1-(pyridin-2-yl)propyl)amino)-2-oxoethyl)-5-oxa-2-azaspiro[3.4]octane-2-carboxylate (**2f**).** Monitored by TLC using acetone:hexanes = 1:2 ( $R_f = 0.3$ ) as the mobile phase and purified with flash column chromatography (acetone:hexanes = 1:2). From **1f** (42.0 mg, 0.1 mmol), compound **2f** (28.9 mg, 70%) was obtained. Yellow oil.  $^1\text{H NMR}$  (400 MHz,  $\text{DMSO-}d_6$ )  $\delta$  8.51 (ddd,  $J = 4.8, 1.8, 0.9$  Hz, 1H), 8.16 (d,  $J = 9.7$  Hz, 1H), 7.72 (td,  $J = 7.6, 1.8$  Hz, 1H), 7.34 (dt,  $J = 7.9, 1.1$  Hz, 1H), 7.26 (ddd,  $J = 7.6, 4.8, 1.1$  Hz, 1H), 4.84 (d,  $J = 9.7$  Hz, 1H), 4.19 (p,  $J = 6.7$  Hz, 1H), 3.88 – 3.70 (m, 4H), 2.44 (dd,  $J = 13.7, 6.7$  Hz, 1H), 2.38 (dd,  $J = 13.7, 6.7$  Hz, 1H), 2.15 – 2.07 (m, 1H), 2.04 – 1.88 (m, 2H), 1.65 – 1.53 (m, 1H), 1.36 (s, 9H), 0.85 (s, 9H).  $^{13}\text{C NMR}$  (151 MHz,  $\text{DMSO-}d_6$ )  $\delta$  169.1, 159.6, 155.6, 148.1, 135.7, 123.2, 122.0, 78.6, 77.6, 76.5, 61.2, 41.9,

35.0, 34.8, 30.1, 28.0, 26.7. HRMS (ESI<sup>+</sup>) *m/z* calcd. for [C<sub>23</sub>H<sub>35</sub>N<sub>3</sub>NaO<sub>4</sub>]<sup>+</sup> : 440.2520, found : 440.2548. *d.r* = 32:1. The diastereomeric ratio was determined by HPLC analysis on C18 column 4.6 × 150 mm, TFA:MeOH:H<sub>2</sub>O = 0.1:50:50, flow rate 0.5 mL/min, λ = 254 nm, *t<sub>R</sub>* = 19.4 min (minor), 17.1 min (major).

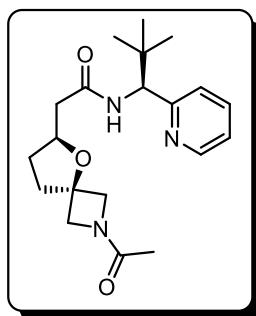

**2-((*S*)-2-acetyl-5-oxa-2-azaspiro[3.4]octan-6-yl)-*N*-((*S*)-2,2-dimethyl-1-(pyridin-2-yl)propyl)acetamide (2g).** Monitored by TLC using CH<sub>2</sub>Cl<sub>2</sub>:MeOH = 17:1 (*R<sub>f</sub>* = 0.3) as the mobile phase and purified with flash column chromatography (CH<sub>2</sub>Cl<sub>2</sub>:MeOH = 17:1). From **1g** (36.1 mg, 0.1 mmol), compound **2g** (26.5 mg, 74%) was obtained. Yellow oil. <sup>1</sup>H NMR (400 MHz, DMSO-*d*<sub>6</sub>) δ 8.55 – 8.48 (m, 1H), 8.13 (d, *J* = 9.7 Hz, 1H), 7.72 (tt, *J* = 7.7, 1.7 Hz, 1H), 7.34 (dt, *J* = 7.7, 1.1 Hz, 1H), 7.26 (ddt, *J* = 7.4, 4.9, 1.1 Hz, 1H), 4.84 (d, *J* = 9.7 Hz, 1H), 4.21 (pd, *J* = 6.7, 2.1 Hz, 1H), 4.14 – 3.96 (m, 2H), 3.87 – 3.68 (m, 2H), 2.46 (ddd, *J* = 13.8, 6.7, 1.9 Hz, 1H), 2.40 (ddd, *J* = 13.8, 6.7, 1.9 Hz, 1H), 2.19 – 1.89 (m, 3H), 1.74 (d, *J* = 3.5 Hz, 3H), 1.66 – 1.56 (m, 1H), 0.86 (s, 9H). <sup>13</sup>C NMR (151 MHz, DMSO-*d*<sub>6</sub>) δ 169.6 (d, *J* = 8.6 Hz), 169.0 (d, *J* = 7.0 Hz), 159.6, 148.1, 135.8 (d, *J* = 2.4 Hz), 123.2 (d, *J* = 5.3 Hz), 122.0, 77.3 (d, *J* = 2.9 Hz), 76.6 (d, *J* = 10.1 Hz), 62.9 (d, *J* = 59.7 Hz), 61.2 (d, *J* = 2.3 Hz), 60.2 (d, *J* = 47.1 Hz), 41.9, 35.0 (d, *J* = 2.0 Hz), 34.8 (d, *J* = 8.3 Hz), 30.1 (d, *J* = 5.7 Hz), 26.7, 19.0 (d, *J* = 3.9 Hz). HRMS (ESI<sup>+</sup>) *m/z* calcd. for [C<sub>20</sub>H<sub>29</sub>N<sub>3</sub>NaO<sub>3</sub>]<sup>+</sup> : 382.2101, found : 382.2153. *d.r* = 23:1. The diastereomeric ratio was determined by HPLC analysis on C18 column 4.6 × 50 mm, TFA:MeOH:H<sub>2</sub>O = 0.1:15:85, flow rate 0.5 mL/min, λ = 254 nm, *t<sub>R</sub>* = 19.1 min (minor), 21.8 min (major).

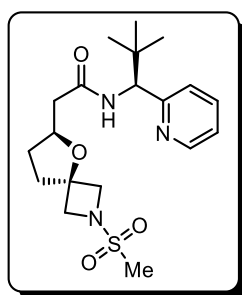

***N*-((*S*)-2,2-dimethyl-1-(pyridin-2-yl)propyl)-2-((*S*)-2-(methylsulfonyl)-5-oxa-2-azaspiro[3.4]octan-6-yl)acetamide (**2h**).** Monitored by TLC using CH<sub>2</sub>Cl<sub>2</sub>:MeOH = 15:1 (R<sub>f</sub> = 0.3) as the mobile phase and purified with flash column chromatography (CH<sub>2</sub>Cl<sub>2</sub>:MeOH = 15:1). From **1h** (39.7 mg, 0.1 mmol), compound **2h** (28.8 mg, 73%) was obtained. Yellow oil. <sup>1</sup>H NMR (400 MHz, DMSO-*d*<sub>6</sub>) δ 8.52 (ddd, *J* = 4.8, 1.9, 0.9 Hz, 1H), 8.13 (d, *J* = 9.7 Hz, 1H), 7.73 (td, *J* = 7.7, 1.9 Hz, 1H), 7.34 (dt, *J* = 7.7, 1.1 Hz, 1H), 7.26 (ddd, *J* = 7.5, 4.8, 1.1 Hz, 1H), 4.85 (d, *J* = 9.7 Hz, 1H), 4.21 (p, *J* = 6.7 Hz, 1H), 3.87 – 3.77 (m, 4H), 2.94 (s, 3H), 2.46 (dd, *J* = 13.8, 6.7 Hz, 1H), 2.39 (dd, *J* = 13.8, 6.7 Hz, 1H), 2.22 – 2.13 (m, 1H), 2.08 – 2.03 (m, 1H), 2.01 – 1.91 (m, 1H), 1.66 – 1.56 (m, 1H), 0.86 (s, 9H). <sup>13</sup>C NMR (101 MHz, DMSO-*d*<sub>6</sub>) δ 169.0, 159.6, 148.1, 135.8, 123.2, 122.1, 76.8, 76.5, 63.1, 62.6, 61.2, 41.8, 35.0, 34.8, 32.9, 30.0, 26.7. HRMS (ESI<sup>+</sup>) *m/z* calcd. for [C<sub>19</sub>H<sub>29</sub>N<sub>3</sub>NaO<sub>4</sub>S]<sup>+</sup> : 418.1771, found : 418.1779. d.r = 24:1. The diastereomeric ratio was determined by HPLC analysis on C18 column 4.6 × 150 mm, TFA:MeOH:H<sub>2</sub>O = 0.1:30:70, flow rate 0.5 mL/min, λ = 254 nm, t<sub>R</sub> = 10.1 min (minor), 10.8 min (major).

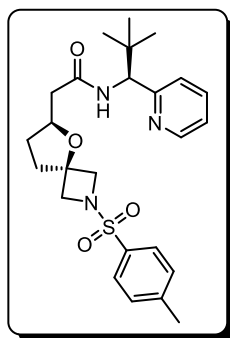

***N*-((*S*)-2,2-dimethyl-1-(pyridin-2-yl)propyl)-2-((*S*)-2-tosyl-5-oxa-2-azaspiro[3.4]octan-6-yl)acetamide (**2i**).** Monitored by TLC using acetone:hexanes = 1:1 (R<sub>f</sub> = 0.5) as the mobile phase and purified with flash column chromatography (acetone:hexanes = 1:1.5). From **1i** (47.3 mg, 0.1 mmol), compound **2i** (35.8 mg, 76%) was obtained. Light yellow solid. <sup>1</sup>H NMR (400 MHz, DMSO-*d*<sub>6</sub>) δ 8.50 (m, 1H), 8.01 (d, *J* = 9.6 Hz, 1H), 7.73 – 7.64 (m, 3H), 7.47 (d, *J* = 8.0 Hz, 2H), 7.30 – 7.23 (m, 2H), 4.77 (d, *J* = 9.6 Hz, 1H), 4.08 (p, *J* = 6.5 Hz, 1H), 3.70 (dd, *J* = 11.4, 8.3 Hz, 2H), 3.49 (dd, *J* = 8.2, 4.3 Hz, 2H), 2.41 (s, 3H), 2.34 (dd, *J* = 13.8, 6.6 Hz, 1H), 2.27 (dd, *J* = 13.8, 6.6 Hz, 1H), 2.03 – 1.81 (m, 3H), 1.61 – 1.49 (m, 1H), 0.81 (s, 9H). <sup>13</sup>C NMR (151 MHz, DMSO-*d*<sub>6</sub>) δ 168.9, 159.5, 148.0, 144.0, 135.7, 130.3, 129.9, 128.3, 123.1, 122.0, 76.8, 76.2, 63.5, 63.2, 61.2, 41.6, 34.9, 34.7, 29.8, 26.7, 21.1. HRMS (ESI<sup>+</sup>) *m/z* calcd. for [C<sub>25</sub>H<sub>34</sub>N<sub>3</sub>O<sub>4</sub>S]<sup>+</sup> : 472.2265, found : 472.2294. d.r = 39:1. The diastereomeric ratio was determined by HPLC analysis on C18 column 4.6 × 150 mm, TFA:MeOH:H<sub>2</sub>O = 0.1:50:50, flow rate 0.5 mL/min, λ = 254 nm, t<sub>R</sub> = 12.3 min (minor), 11.1 min (major).

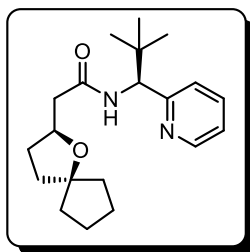

***N*-((*S*)-2,2-dimethyl-1-(pyridin-2-yl)propyl)-2-((*S*)-1-oxaspiro[4.4]nonan-2-yl)acetamide (2j).**

Monitored by TLC using acetone:hexanes = 1:3 ( $R_f$  = 0.3) as the mobile phase and purified with flash column chromatography (acetone:hexanes = 1:3). From **1j** (33.2 mg, 0.1 mmol), compound **2j** (22.2 mg, 68%) was obtained. Pale yellow oil.  $^1\text{H}$  NMR (400 MHz,  $\text{DMSO-}d_6$ )  $\delta$  8.50 (ddd,  $J$  = 4.8, 1.8, 0.9 Hz, 1H), 8.07 (d,  $J$  = 9.6 Hz, 1H), 7.72 (td,  $J$  = 7.9, 1.8 Hz, 1H), 7.33 (dt,  $J$  = 7.9, 1.1 Hz, 1H), 7.25 (ddd,  $J$  = 7.5, 4.8, 1.1 Hz, 1H), 4.83 (d,  $J$  = 9.6 Hz, 1H), 4.08 (p,  $J$  = 6.7 Hz, 1H), 2.42 (dd,  $J$  = 13.9, 6.7 Hz, 1H), 2.35 (dd,  $J$  = 13.9, 6.7 Hz, 1H), 1.99 – 1.89 (m, 1H), 1.88 – 1.74 (m, 2H), 1.73 – 1.42 (m, 9H), 0.86 (s, 9H).  $^{13}\text{C}$  NMR (151 MHz,  $\text{DMSO-}d_6$ )  $\delta$  169.4, 159.6, 148.1, 135.7, 123.1, 122.0, 90.6, 74.8, 61.2, 42.5, 38.6, 37.8, 35.4, 35.0, 31.2, 26.7, 23.5, 23.4. HRMS ( $\text{ESI}^+$ )  $m/z$  calcd. for  $[\text{C}_{20}\text{H}_{30}\text{N}_2\text{NaO}_2]^+$ : 353.2199, found : 353.2241. d.r = 18:1. The diastereomeric ratio was determined by HPLC analysis on C18 column  $4.6 \times 50$  mm, TFA:MeOH:H<sub>2</sub>O = 0.1:60:40, flow rate 0.5 mL/min,  $\lambda$  = 254 nm,  $t_R$  = 3.9 min (minor), 3.4 min (major).

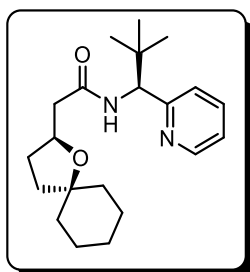

***N*-((*S*)-2,2-dimethyl-1-(pyridin-2-yl)propyl)-2-((*S*)-1-oxaspiro[4.5]decan-2-yl)acetamide (2k).**

Monitored by TLC using acetone:hexanes = 1:4 ( $R_f$  = 0.3) as the mobile phase and purified with flash column chromatography (acetone:hexanes = 1:4). From **1k** (34.6 mg, 0.1 mmol), compound **2k** (23.3 mg, 68%) was obtained. Pale yellow oil.  $^1\text{H}$  NMR (400 MHz,  $\text{DMSO-}d_6$ )  $\delta$  8.50 (ddd,  $J$  = 4.8, 1.9, 0.9 Hz, 1H), 8.08 (d,  $J$  = 9.6 Hz, 1H), 7.71 (td,  $J$  = 7.9, 1.9 Hz, 1H), 7.33 (dt,  $J$  = 7.9, 1.1 Hz, 1H), 7.25 (ddd,  $J$  = 7.5, 4.8, 1.1 Hz, 1H), 4.83 (d,  $J$  = 9.6 Hz, 1H), 4.10 (p,  $J$  = 6.6 Hz, 1H), 2.43 (dd,  $J$  = 13.8, 6.6 Hz, 1H), 2.34 (dd,  $J$  = 13.8, 6.6 Hz, 1H), 1.98 – 1.87 (m, 1H), 1.71 – 1.28 (m, 13H), 0.86 (s, 9H).  $^{13}\text{C}$  NMR (151 MHz,  $\text{DMSO-}d_6$ )  $\delta$  169.5, 159.6, 148.1, 135.7, 123.1, 122.0, 81.9, 74.6, 61.1, 42.7, 38.1, 36.8, 35.7, 35.0, 30.8, 26.7, 25.2, 23.3, 23.0. HRMS ( $\text{ESI}^+$ )  $m/z$  calcd. for  $[\text{C}_{21}\text{H}_{32}\text{N}_2\text{NaO}_2]^+$ : 367.2356, found : 367.2370. d.r = 21:1. The diastereomeric ratio was determined by HPLC analysis on C18

column  $4.6 \times 50$  mm, TFA:MeOH:H<sub>2</sub>O = 0.1:50:50, flow rate 0.5 mL/min,  $\lambda = 254$  nm,  $t_R = 15.9$  min (minor), 12.4 min (major).

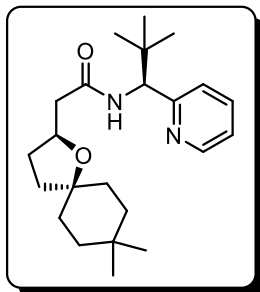

***N*-((*S*)-2,2-dimethyl-1-(pyridin-2-yl)propyl)-2-((*S*)-8,8-dimethyl-1-oxaspiro[4.5]decan-2-yl)acetamide (**2l**)**. Monitored by TLC using acetone:hexanes = 1:4 ( $R_f = 0.3$ ) as the mobile phase and purified with flash column chromatography (acetone:hexanes = 1:4). From **1l** (37.4 mg, 0.1 mmol), compound **2l** (23.3 mg, 64%) was obtained. Pale yellow oil. <sup>1</sup>H NMR (400 MHz, DMSO-*d*<sub>6</sub>)  $\delta$  8.50 (ddd,  $J = 4.8, 1.9, 0.9$  Hz, 1H), 8.08 (d,  $J = 9.6$  Hz, 1H), 7.71 (td,  $J = 7.7, 1.9$  Hz, 1H), 7.33 (dt,  $J = 7.7, 1.1$  Hz, 1H), 7.25 (ddd,  $J = 7.5, 4.8, 1.1$  Hz, 1H), 4.84 (d,  $J = 9.6$  Hz, 1H), 4.10 (p,  $J = 6.6$  Hz, 1H), 2.43 (dd,  $J = 14.0, 6.6$  Hz, 1H), 2.33 (dd,  $J = 14.0, 6.6$  Hz, 1H), 1.97 – 1.88 (m, 1H), 1.75 – 1.35 (m, 9H), 1.19 – 1.10 (m, 2H), 0.91 – 0.80 (m, 15H). <sup>13</sup>C NMR (151 MHz, DMSO-*d*<sub>6</sub>)  $\delta$  169.4, 159.5, 148.1, 135.7, 123.2, 122.0, 81.8, 74.6, 61.1, 42.8, 35.9, 35.6, 35.0, 34.0, 32.7, 30.7, 29.2, 26.7. HRMS (ESI<sup>+</sup>)  $m/z$  calcd. for [C<sub>23</sub>H<sub>36</sub>N<sub>2</sub>NaO<sub>2</sub>]<sup>+</sup>: 395.2669, found: 395.2680. d.r = 17:1. The diastereomeric ratio was determined by HPLC analysis on C18 column  $4.6 \times 50$  mm, TFA:MeOH:H<sub>2</sub>O = 0.1:70:30, flow rate 0.5 mL/min,  $\lambda = 254$  nm,  $t_R = 5.7$  min (minor), 5.0 min (major).

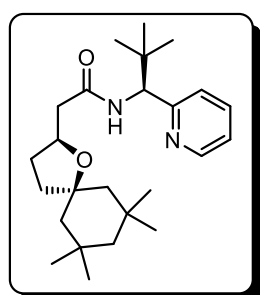

***N*-((*S*)-2,2-dimethyl-1-(pyridin-2-yl)propyl)-2-((*S*)-7,7,9,9-tetramethyl-1-oxaspiro[4.5]decan-2-yl)acetamide (**2m**)**. Monitored by TLC using acetone:hexanes = 1:4 ( $R_f = 0.3$ ) as the mobile phase and purified with flash column chromatography (acetone:hexanes = 1:4). From **1m** (40.3 mg, 0.1 mmol), compound **2m** (26.3 mg, 66%) was obtained. Pale yellow oil. <sup>1</sup>H NMR (400 MHz, DMSO-*d*<sub>6</sub>)  $\delta$  8.48 (ddd,  $J = 4.8, 1.9, 0.9$  Hz, 1H), 8.04 (d,  $J = 9.6$  Hz, 1H), 7.69 (td,  $J = 7.6, 1.9$  Hz, 1H), 7.30 (dt,  $J = 7.6, 1.1$  Hz, 1H), 7.23 (ddd,  $J = 7.5, 4.8, 1.1$  Hz, 1H), 4.83 (d,  $J = 9.6$  Hz, 1H), 4.13 (p,  $J = 6.7$  Hz, 1H), 2.43 (dd,  $J = 13.4$  Hz, 6.7 Hz, 1H), 2.38 (dd, 13.4 Hz, 6.7 Hz, 1H),

1.92 – 1.82 (m, 1H), 1.70 – 1.51 (m, 3H), 1.49 – 1.41 (m, 2H), 1.21 – 1.14 (m, 2H), 1.08 – 0.92 (m, 8H), 0.90 – 0.76 (m, 15H). <sup>13</sup>C NMR (151 MHz, DMSO-*d*<sub>6</sub>) δ 169.4, 159.6, 148.1, 135.7, 123.1, 121.9, 83.0, 75.3, 61.1, 51.7, 48.9, 46.9, 43.0, 35.3, 35.3, 35.0, 31.4, 29.7, 28.6, 28.3, 26.8. HRMS (ESI<sup>+</sup>) *m/z* calcd. for [C<sub>25</sub>H<sub>40</sub>N<sub>2</sub>NaO<sub>2</sub>]<sup>+</sup>: 423.2982, found: 423.2980. *d.r.* = 11:1. The diastereomeric ratio was determined by HPLC analysis on C18 column 4.6 × 50 mm, TFA:MeOH:H<sub>2</sub>O = 0.1:70:30, flow rate 0.5 mL/min, λ = 254 nm, *t<sub>R</sub>* = 14.6 min (minor), 11.1 min (major).

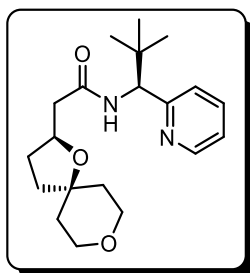

***N*-((*S*)-2,2-dimethyl-1-(pyridin-2-yl)propyl)-2-((*S*)-1,8-dioxaspiro[4.5]decan-2-yl)acetamide (2n).**

Monitored by TLC using acetone:hexanes = 1:2 (*R<sub>f</sub>* = 0.4) as the mobile phase and purified with flash column chromatography (acetone:hexanes = 1:3). From **1n** (34.8 mg, 0.1 mmol), compound **2n** (19.8 mg, 58%) was obtained. mp 118-121 °C. White solid. <sup>1</sup>H NMR (400 MHz, DMSO-*d*<sub>6</sub>) δ 8.50 (ddd, *J* = 4.8, 1.9, 0.9 Hz, 1H), 8.08 (d, *J* = 9.6 Hz, 1H), 7.72 (td, *J* = 7.7, 1.9 Hz, 1H), 7.33 (dt, *J* = 7.7, 1.1 Hz, 1H), 7.26 (ddd, *J* = 7.5, 4.8, 1.1 Hz, 1H), 4.84 (d, *J* = 9.6 Hz, 1H), 4.15 (p, *J* = 6.9 Hz, 1H), 3.64 – 3.56 (m, 2H), 3.54 – 3.44 (m, 2H), 2.46 (dd, *J* = 13.8, 6.9 Hz, 1H), 2.36 (dd, *J* = 13.8, 6.9 Hz, 1H), 2.00 – 1.91 (m, 1H), 1.80 – 1.44 (m, 7H), 0.86 (s, 9H). <sup>13</sup>C NMR (151 MHz, DMSO-*d*<sub>6</sub>) δ 169.4, 159.5, 148.1, 135.7, 123.2, 122.0, 79.2, 74.9, 64.5, 64.3, 61.1, 42.6, 38.4, 37.1, 35.8, 35.0, 30.4, 26.7. HRMS (ESI<sup>+</sup>) *m/z* calcd. for [C<sub>20</sub>H<sub>30</sub>N<sub>2</sub>NaO<sub>3</sub>]<sup>+</sup>: 369.2149, found: 369.2177. *d.r.* = 15:1. The diastereomeric ratio was determined by HPLC analysis on C18 column 4.6 × 50 mm, TFA:MeOH:H<sub>2</sub>O = 0.1:20:80, flow rate 0.5 mL/min, λ = 254 nm, *t<sub>R</sub>* = 29.4 min (minor), 32.0 min (major).

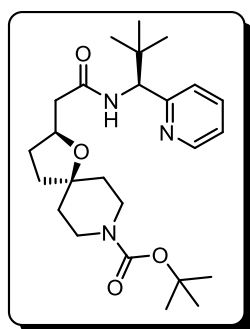

***tert*-butyl (S)-2-(2-(((S)-2,2-dimethyl-1-(pyridin-2-yl)propyl)amino)-2-oxoethyl)-1-oxa-8-azaspiro[4.5]decane-8-carboxylate (2o).** Monitored by TLC using acetone:hexanes = 1:3 (*R<sub>f</sub>* = 0.3) as the mobile phase and purified with flash column chromatography (acetone:hexanes = 1:3). From **1o**

(44.8 mg, 0.1 mmol), compound **2o** (26.7 mg, 60%) was obtained. Yellow oil.  $^1\text{H}$  NMR (400 MHz, DMSO- $d_6$ )  $\delta$  8.49 (ddd,  $J = 4.8, 1.9, 0.9$  Hz, 1H), 8.07 (d,  $J = 9.6$  Hz, 1H), 7.70 (td,  $J = 7.7, 1.9$  Hz, 1H), 7.33 (dt,  $J = 7.7, 1.1$  Hz, 1H), 7.24 (ddd,  $J = 7.5, 4.8, 1.1$  Hz, 1H), 4.84 (d,  $J = 9.6$  Hz, 1H), 4.14 (p,  $J = 6.6$  Hz, 1H), 3.49 – 3.37 (m, 2H), 3.21 – 3.02 (m, 2H), 2.45 (dd,  $J = 13.7, 6.6$  Hz, 1H), 2.35 (dd,  $J = 13.7, 6.6$  Hz, 1H), 2.02 – 1.92 (m, 1H), 1.79 – 1.58 (m, 3H), 1.52 – 1.35 (m, 13H), 0.86 (s, 9H).  $^{13}\text{C}$  NMR (151 MHz, DMSO- $d_6$ )  $\delta$  169.4, 159.5, 153.9, 148.1, 135.7, 123.2, 122.0, 79.8, 78.4, 75.1, 61.1, 42.7, 35.7, 35.0, 30.5, 28.1, 26.7. HRMS (ESI $^+$ )  $m/z$  calcd. for  $[\text{C}_{25}\text{H}_{39}\text{N}_3\text{NaO}_4]^+$ : 468.2833, found : 468.2883. d.r = 14:1. The diastereomeric ratio was determined by HPLC analysis on C18 column 4.6  $\times$  50 mm, TFA:MeOH:H $_2$ O = 0.1:52:48, flow rate 0.5 mL/min,  $\lambda = 254$  nm,  $t_{\text{R}} = 12.8$  min (minor), 10.5 min (major).

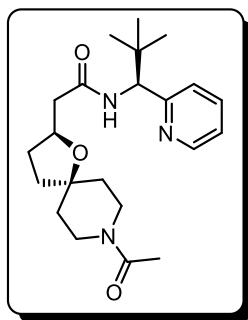

**2-((S)-8-acetyl-1-oxa-8-azaspiro[4.5]decan-2-yl)-N-((S)-2,2-dimethyl-1-(pyridin-2-yl)propyl)acetamide (2p)**. Monitored by TLC using acetone:hexanes = 3:1 ( $R_{\text{f}} = 0.3$ ) as the mobile phase and purified with flash column chromatography (acetone:hexanes = 3:1). From **1p** (39.0 mg, 0.1 mmol), compound **2p** (20.8 mg, 54%) was obtained. Pale yellow oil.  $^1\text{H}$  NMR (400 MHz, DMSO- $d_6$ )  $\delta$  8.54 – 8.46 (m, 1H), 8.08 (dd,  $J = 9.6, 3.1$  Hz, 1H), 7.72 (tdd,  $J = 7.7, 3.2, 1.9$  Hz, 1H), 7.34 (dt,  $J = 7.7, 1.1$  Hz, 1H), 7.25 (ddd,  $J = 7.4, 4.8, 1.1$  Hz, 1H), 4.85 (d,  $J = 9.6$  Hz, 1H), 4.16 (p,  $J = 6.7$  Hz, 1H), 3.80 – 3.68 (m, 1H), 3.48 – 3.37 (m, 1H), 3.30 – 3.02 (m, 2H), 2.47 (dd,  $J = 13.7, 6.7$  Hz, 1H), 2.37 (dd,  $J = 13.7, 6.7$  Hz, 1H), 2.03 – 1.94 (m, 4H), 1.83 – 1.30 (m, 7H), 0.87 (s, 9H).  $^{13}\text{C}$  NMR (151 MHz, DMSO- $d_6$ )  $\delta$  169.4 (d,  $J = 4.9$  Hz), 167.8 (d,  $J = 5.9$  Hz), 159.5, 148.1, 135.7 (d,  $J = 3.8$  Hz), 123.2 (d,  $J = 4.4$  Hz), 122.0 (d,  $J = 2.7$  Hz), 79.9, 75.2 (d,  $J = 6.1$  Hz), 61.1 (d,  $J = 2.3$  Hz), 43.1 (d,  $J = 21.6$  Hz), 42.7 (d,  $J = 3.9$  Hz), 38.2 (d,  $J = 21.9$  Hz), 37.8, 37.1, 36.5, 35.8, 35.8 (d,  $J = 2.9$  Hz), 35.1 (d,  $J = 2.2$  Hz), 30.5 (d,  $J = 5.6$  Hz), 29.6, 26.7, 21.3. HRMS (ESI $^+$ )  $m/z$  calcd. for  $[\text{C}_{22}\text{H}_{33}\text{N}_3\text{NaO}_3]^+$ : 410.2414, found : 410.2448. d.r = 11:1. The diastereomeric ratio was determined by HPLC analysis on C18 column 4.6  $\times$  50 mm, TFA:MeOH:H $_2$ O = 0.1:33:67, flow rate 0.5 mL/min,  $\lambda = 254$  nm,  $t_{\text{R}} = 4.5$  min (minor), 4.8 min (major).

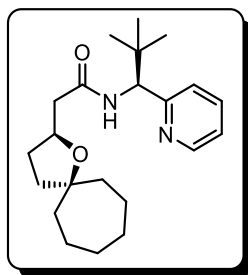

***N*-((*S*)-2,2-dimethyl-1-(pyridin-2-yl)propyl)-2-((*S*)-1-oxaspiro[4.6]undecan-2-yl)acetamide (**2q**).**

Monitored by TLC using acetone:hexanes = 1:5 ( $R_f$  = 0.2) as the mobile phase and purified with flash column chromatography (acetone:hexanes = 1:4). From **1q** (36.1 mg, 0.1 mmol), compound **2q** (26.1 mg, 73%) was obtained. Yellow oil.  $^1\text{H NMR}$  (400 MHz,  $\text{DMSO-}d_6$ )  $\delta$  8.50 (ddd,  $J$  = 4.8, 1.9, 0.9 Hz, 1H), 8.07 (d,  $J$  = 9.6 Hz, 1H), 7.72 (td,  $J$  = 7.7, 1.9 Hz, 1H), 7.33 (dt,  $J$  = 7.7, 1.1 Hz, 1H), 7.25 (ddd,  $J$  = 7.5, 4.8, 1.1 Hz, 1H), 4.82 (d,  $J$  = 9.6 Hz, 1H), 4.06 (p,  $J$  = 6.7 Hz, 1H), 2.42 (dd,  $J$  = 13.8, 6.7 Hz, 1H), 2.33 (dd,  $J$  = 13.8, 6.7 Hz, 1H), 1.95 – 1.86 (m, 1H), 1.74 – 1.26 (m, 15H), 0.86 (s, 9H).  $^{13}\text{C NMR}$  (151 MHz,  $\text{DMSO-}d_6$ )  $\delta$  169.5, 159.6, 148.1, 135.7, 123.1, 122.0, 85.5, 74.7, 61.2, 42.6, 41.3, 37.7, 35.0, 30.7, 28.7, 28.7, 26.7, 22.6, 22.3. HRMS ( $\text{ESI}^+$ )  $m/z$  calcd. for  $[\text{C}_{22}\text{H}_{34}\text{N}_2\text{NaO}_2]^+$ : 381.2512, found: 381.2565. d.r = 17:1. The diastereomeric ratio was determined by HPLC analysis on C18 column 4.6  $\times$  50 mm, TFA:MeOH:H<sub>2</sub>O = 0.1:65:35, flow rate 0.5 mL/min,  $\lambda$  = 254 nm,  $t_R$  = 5.9 min (minor), 4.9 min (major).

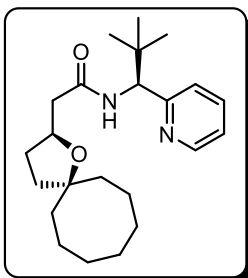

***N*-((*S*)-2,2-dimethyl-1-(pyridin-2-yl)propyl)-2-((*S*)-1-oxaspiro[4.7]dodecan-2-yl)acetamide (**2r**).**

Monitored by TLC using acetone:hexanes = 1:5 ( $R_f$  = 0.2) as the mobile phase and purified with flash column chromatography (acetone:hexanes = 1:4). From **1r** (37.5 mg, 0.1 mmol), compound **2r** (24.3 mg, 66%) was obtained. Yellow oil.  $^1\text{H NMR}$  (400 MHz,  $\text{DMSO-}d_6$ )  $\delta$  8.50 (ddd,  $J$  = 4.8, 1.9, 0.9 Hz, 1H), 8.06 (d,  $J$  = 9.6 Hz, 1H), 7.72 (td,  $J$  = 7.7, 1.9 Hz, 1H), 7.33 (dt,  $J$  = 7.7, 1.1 Hz, 1H), 7.25 (ddd,  $J$  = 7.5, 4.8, 1.1 Hz, 1H), 4.82 (d,  $J$  = 9.6 Hz, 1H), 4.07 (p,  $J$  = 6.7 Hz, 1H), 2.41 (dd,  $J$  = 13.8, 6.7 Hz, 1H), 2.33 (dd,  $J$  = 13.8, 6.7 Hz, 1H), 1.97 – 1.87 (m, 1H), 1.77 – 1.33 (m, 17H), 0.86 (s, 9H).  $^{13}\text{C NMR}$  (151 MHz,  $\text{DMSO-}d_6$ )  $\delta$  169.5, 159.6, 148.1, 135.7, 123.1, 122.0, 85.4, 74.6, 61.2, 42.7, 36.6, 36.4, 35.1, 35.0, 30.9, 27.9, 27.7, 26.7, 24.2, 22.4, 22.1. HRMS ( $\text{ESI}^+$ )  $m/z$  calcd. for  $[\text{C}_{23}\text{H}_{36}\text{N}_2\text{NaO}_2]^+$ : 395.2669, found: 395.2682. d.r = 20:1. The diastereomeric ratio was determined by HPLC analysis on



C18 column 4.6 × 50 mm, TFA:MeOH:H<sub>2</sub>O = 0.1:70:30, flow rate 0.5 mL/min, λ = 254 nm, t<sub>R</sub> = 5.7 min (minor), 4.7 min (major).

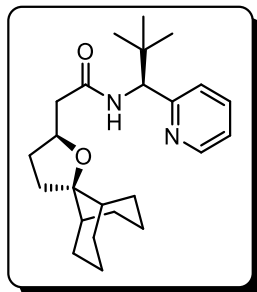

**2-((1R,5S,5'S)-dihydro-3'H-spiro[bicyclo[3.3.1]nonane-9,2'-furan]-5'-yl)-N-((S)-2,2-dimethyl-1-(pyridin-2-yl)propyl)acetamide (2s).** Monitored by TLC using acetone:hexanes = 1:4 (R<sub>f</sub> = 0.3) as the mobile phase and purified with flash column chromatography (acetone:hexanes = 1:4). From **1s** (38.7 mg, 0.1 mmol), compound **2s** (20.3 mg, 53%) was obtained. Yellow oil. <sup>1</sup>H NMR (400 MHz, DMSO-*d*<sub>6</sub>) δ 8.49 (ddd, *J* = 4.8, 1.9, 0.9 Hz, 1H), 8.06 (d, *J* = 9.6 Hz, 1H), 7.71 (td, *J* = 7.7, 1.9 Hz, 1H), 7.33 (dt, *J* = 7.7, 1.1 Hz, 1H), 7.25 (ddd, *J* = 7.5, 4.8, 1.1 Hz, 1H), 4.85 (d, *J* = 9.6 Hz, 1H), 4.11 (p, *J* = 6.8 Hz, 1H), 2.44 (dd, *J* = 13.8, 6.8 Hz, 1H), 2.34 (dd, *J* = 13.8, 6.8 Hz, 1H), 2.07 (tq, *J* = 12.8, 6.4 Hz, 2H), 1.97 – 1.53 (m, 12H), 1.44 – 1.29 (m, 4H), 0.86 (s, 9H). <sup>13</sup>C NMR (151 MHz, DMSO-*d*<sub>6</sub>) δ 169.5, 159.5, 148.1, 135.7, 123.1, 122.0, 84.4, 74.1, 61.1, 43.2, 37.6, 36.2, 35.0, 33.7, 30.9, 30.1, 29.6, 27.1, 27.0, 26.7, 20.7, 20.5. HRMS (ESI<sup>+</sup>) *m/z* calcd. for [C<sub>24</sub>H<sub>36</sub>N<sub>2</sub>NaO<sub>2</sub>]<sup>+</sup>: 407.2669, found: 407.2678. *d.r* = 11:1. The diastereomeric ratio was determined by HPLC analysis on C18 column 4.6 × 50 mm, TFA:MeOH:H<sub>2</sub>O = 0.1:65:35, flow rate 0.5 mL/min, λ = 254 nm, t<sub>R</sub> = 15.4 min (minor), 12.0 min (major).

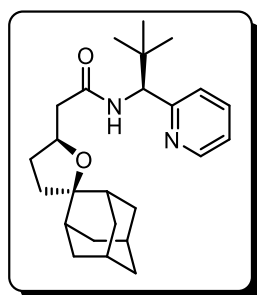

**2-((1S,3S,5S,5'S,7S)-dihydro-3'H-spiro[adamantane-2,2'-furan]-5'-yl)-N-((S)-2,2-dimethyl-1-(pyridin-2-yl)propyl)acetamide (2t).** Monitored by TLC using acetone:hexanes = 1:4 (R<sub>f</sub> = 0.3) as the mobile phase and purified with flash column chromatography (acetone:hexanes = 1:4). From **1t** (39.9 mg, 0.1 mmol), compound **2t** (23.6 mg, 60%) was obtained. Yellow oil. <sup>1</sup>H NMR (400 MHz, DMSO-*d*<sub>6</sub>) δ 8.49 (ddd, *J* = 4.8, 1.8, 0.9 Hz, 1H), 8.05 (d, *J* = 9.5 Hz, 1H), 7.70 (td, *J* = 7.7, 1.8 Hz, 1H), 7.33

(dt,  $J = 7.7, 1.1$  Hz, 1H), 7.24 (ddd,  $J = 7.5, 4.8, 1.1$  Hz, 1H), 4.84 (d,  $J = 9.6$  Hz, 1H), 4.10 (p,  $J = 6.7$  Hz, 1H), 2.44 (dd,  $J = 13.7, 6.7$  Hz, 1H), 2.33 (dd,  $J = 13.7, 6.7$  Hz, 1H), 2.11 – 1.99 (m, 2H), 1.96 – 1.83 (m, 2H), 1.77 – 1.52 (m, 12H), 1.46 – 1.35 (m, 2H), 0.86 (s, 9H).  $^{13}\text{C}$  NMR (151 MHz, DMSO- $d_6$ )  $\delta$  169.6, 159.5, 148.1, 135.7, 123.1, 122.0, 85.8, 74.5, 61.1, 43.0, 37.9, 37.3, 36.6, 35.6, 35.0, 34.8, 34.2, 33.0, 33.0, 31.2, 26.7, 26.6, 26.5. HRMS (ESI $^+$ )  $m/z$  calcd. for  $[\text{C}_{25}\text{H}_{36}\text{N}_2\text{NaO}_2]^+$ : 419.2669, found: 419.2667. d.r = 17:1. The diastereomeric ratio was determined by HPLC analysis on C18 column 4.6  $\times$  50 mm, TFA:MeOH:H $_2$ O = 0.1:65:35, flow rate 0.5 mL/min,  $\lambda = 254$  nm,  $t_{\text{R}} = 15.4$  min (minor), 11.1 min (major).

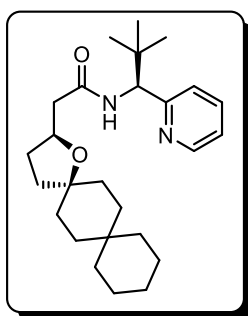

***N*-((*S*)-2,2-dimethyl-1-(pyridin-2-yl)propyl)-2-((*S*)-1-oxadispiro[4.2.5 $^8$ .2 $^5$ ]pentadecan-2-yl)acetamide (**2u**).** Monitored by TLC using acetone:hexanes = 1:3 ( $R_{\text{f}} = 0.3$ ) as the mobile phase and purified with flash column chromatography (acetone:hexanes = 1:3). From **1u** (41.5 mg, 0.1 mmol), compound **2u** (26.6 mg, 65%) was obtained. Yellow oil.  $^1\text{H}$  NMR (400 MHz, DMSO- $d_6$ )  $\delta$  8.50 (ddd,  $J = 4.8, 1.9, 0.9$  Hz, 1H), 8.07 (d,  $J = 9.6$  Hz, 1H), 7.71 (td,  $J = 7.7, 1.9$  Hz, 1H), 7.33 (dt,  $J = 7.7, 1.1$  Hz, 1H), 7.25 (ddd,  $J = 7.6, 4.8, 1.1$  Hz, 1H), 4.83 (d,  $J = 9.6$  Hz, 1H), 4.09 (p,  $J = 6.6$  Hz, 1H), 2.42 (dd,  $J = 14.0, 6.6$  Hz, 1H), 2.33 (dd,  $J = 14.0, 6.6$  Hz, 1H), 1.97 – 1.87 (m, 1H), 1.74 – 1.53 (m, 3H), 1.50 – 1.32 (m, 12H), 1.30 – 1.18 (m, 6H), 0.86 (s, 9H).  $^{13}\text{C}$  NMR (151 MHz, DMSO- $d_6$ )  $\delta$  169.5, 159.5, 148.1, 135.7, 123.3, 122.0, 82.3, 74.5, 61.1, 42.8, 35.1, 33.2, 31.8, 31.3, 30.7, 26.7, 26.5, 21.4, 21.2. HRMS (ESI $^+$ )  $m/z$  calcd. for  $[\text{C}_{26}\text{H}_{40}\text{N}_2\text{NaO}_2]^+$ : 435.2982, found: 435.2991. d.r = 16:1. The diastereomeric ratio was determined by HPLC analysis on C18 column 4.6  $\times$  50 mm, TFA:MeOH:H $_2$ O = 0.1:65:35, flow rate 0.5 mL/min,  $\lambda = 254$  nm,  $t_{\text{R}} = 27.7$  min (minor), 23.1 min (major).

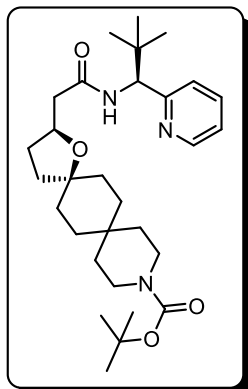

*tert*-butyl (S)-2-(2-(((S)-2,2-dimethyl-1-(pyridin-2-yl)propyl)amino)-2-oxoethyl)-1-oxa-11-azadispiro[4.2.5<sup>8</sup>.2<sup>5</sup>]pentadecane-11-carboxylate (**2v**). Monitored by TLC using acetone:hexanes = 1:3 ( $R_f = 0.3$ ) as the mobile phase and purified with flash column chromatography (acetone:hexanes = 1:3). From **1v** (51.6 mg, 0.1 mmol), compound **2v** (29.8 mg, 62%) was obtained. Yellow oil. <sup>1</sup>H NMR (400 MHz, DMSO-*d*<sub>6</sub>)  $\delta$  8.50 (ddd,  $J = 4.8, 1.9, 0.8$  Hz, 1H), 8.07 (d,  $J = 9.6$  Hz, 1H), 7.72 (td,  $J = 7.8, 1.9$  Hz, 1H), 7.33 (dt,  $J = 7.8, 1.1$  Hz, 1H), 7.25 (ddd,  $J = 7.5, 4.8, 1.1$  Hz, 1H), 4.84 (d,  $J = 9.6$  Hz, 1H), 4.10 (p,  $J = 6.6$  Hz, 1H), 3.30 – 3.21 (m, 4H), 2.43 (dd,  $J = 13.9, 6.6$  Hz, 1H), 2.33 (dd,  $J = 13.9, 6.6$  Hz, 1H), 1.97 – 1.89 (m, 1H), 1.74 – 1.55 (m, 3H), 1.38 (s, 21H), 0.86 (s, 9H). <sup>13</sup>C NMR (151 MHz, DMSO-*d*<sub>6</sub>)  $\delta$  169.4, 159.5, 153.9, 148.1, 135.8, 123.2, 122.0, 82.0, 78.3, 74.6, 61.1, 54.9, 42.8, 35.1, 33.0, 32.2, 31.9, 31.7, 30.7, 30.1, 28.1, 26.7. HRMS (ESI<sup>+</sup>)  $m/z$  calcd. for [C<sub>30</sub>H<sub>47</sub>N<sub>3</sub>NaO<sub>4</sub>]<sup>+</sup>: 536.3459, found : 536.3456.  $d.r = 17:1$ . The diastereomeric ratio was determined by HPLC analysis on C18 column 4.6 × 150 mm, TFA:MeOH:H<sub>2</sub>O = 0.1:70:30, flow rate 0.5 mL/min,  $\lambda = 254$  nm,  $t_R = 17.9$  min (minor), 16.4 min (major).

## VI. Computational Study

All calculations were carried out using density functional theory (DFT)<sup>6</sup> as implemented in the Jaguar 9.1 suite of ab initio quantum chemistry programs.<sup>7</sup> Geometry optimizations were performed with B3LYP<sup>8</sup> functional including Grimme's D3 dispersion corrections<sup>9</sup> at 6-31G\*\* as a basis set level.<sup>10</sup> Pd was described by the LACVP basis set<sup>11</sup> which includes relativistic effective core potentials (ECP). The electronic energies were reevaluated by single point calculations using Dunning's correlation-consistent triple- $\zeta$  basis set, cc-pVTZ(-f)<sup>12</sup> which includes a double set of polarization functions. For Pd, a modified version of LACVP, designated as LACV3P: containing the decontracted exponents to match the effective core potential with triple- $\zeta$  quality, was used. Vibrational frequencies were computed at the B3LYP-D3/6-31G\*\*/LACVP level of theory. We used zero point energy (ZPE) and vibrational entropy corrections from unscaled frequencies. Solvation corrections were evaluated by a self-consistent reaction field (SCRF) approach<sup>13</sup> with the dielectric constant  $\epsilon = 2.379$  (toluene) on the gas phase optimized structures. All values in the energy profile are relative free energies (kcal/mol) at 393.15 K.

### VI.1. Fragment analysis of A7-TS and B7-TS.

Here, we discuss fragment analysis of the two transition states, **A7-TS** and **B7-TS** to highlight the origin of the energetic difference. Fig. S1 illustrates the relative electronic energy of the transition states have contributions from distortion and interaction energies. **A7** loses 24.0 kcal/mol of interaction energy between the directing group (DG) and metal fragment (MF) when it transforms to **A7-TS**. The

relaxation of DG and metal fragments stabilize the transition state energy -2.1 and -6.3 kcal/mol, respectively. So, the overall electronic energy change from **A7** to **A7-TS** is 15.7 kcal/mol. In comparison, this change in energy from **B7** to **B7-TS** is 2.5 kcal/mol higher. The main component which induces this difference is the distortion energy of DG fragment, which stabilizes the **A7-TS** by 2.1 kcal/mol and destabilizes the **B7-TS** by 3.9 kcal/mol. Hence, the energy difference in the reductive elimination transition states appears to be dictated by the distortion energy of the DG fragments. The configuration of the amine ligand may have caused the difference in distortion energies, as discussed in the main text.

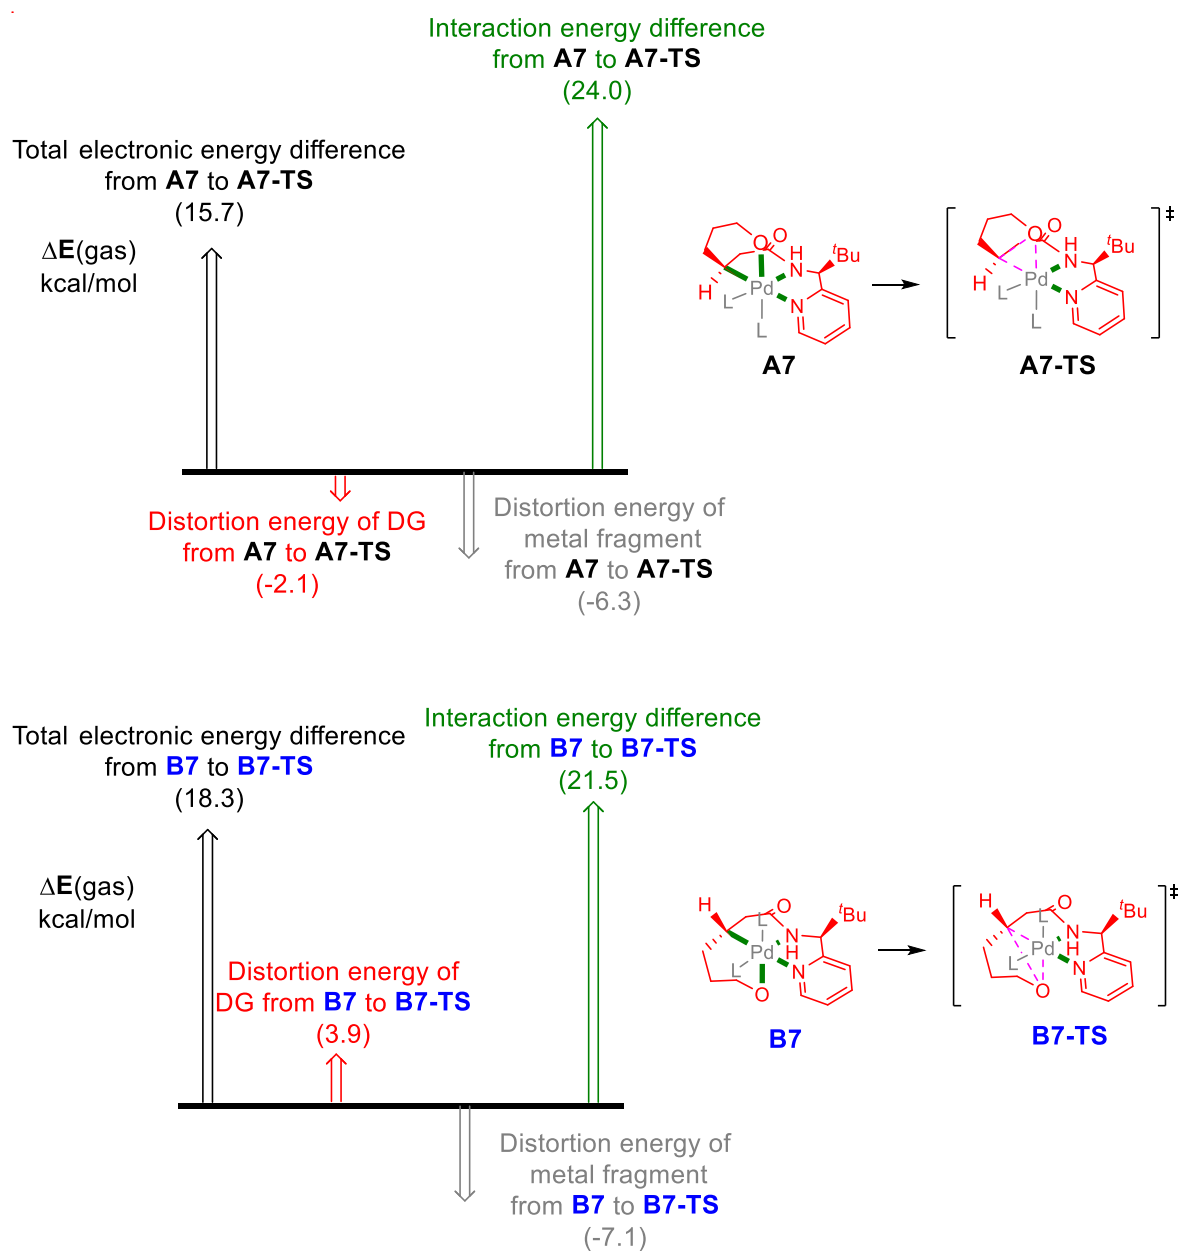

**Fig. S1** Distortion/interaction model of reductive elimination step.

## VI.2. Competitive Reductive Elimination Mechanism for C–O bond forming.

**Scheme S7.** Comparison of two possible reductive elimination mechanisms. a) Path A, b) Path B.

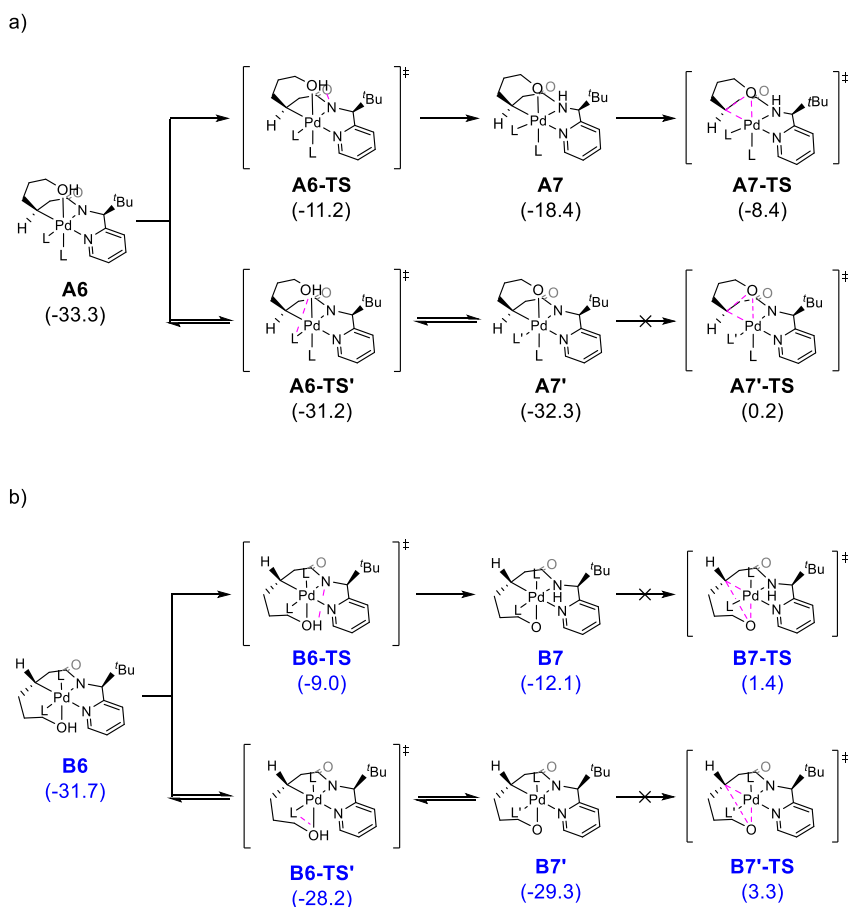

Scheme S7a describes the two possible reductive elimination steps in path A. The hydroxyl moiety of **A6** must be deprotonated to enable the reductive elimination affording the product. There are two possible pathways to mediate the deprotonation: one is the proton shift from hydroxyl to amido ligand (**A6-TS**), and the other is the acetate mediated deprotonation (**A6-TS'**). As expected, **A6-TS'** is more feasible since the acetate is more basic than the amido ligand. The barrier of the acetate mediated deprotonation step is only 2.1 kcal/mol and it gives **A7'**, which is isoenergetic to **A6**. But this pathway cannot produce the product because the reductive elimination step, the following **A7'-TS**, has a relatively high barrier (33.5 kcal/mol). So, the formation of the target oxaspirocycle product(S,S) proceeds via **A6-TS**. The proton shift is 14.9 kcal/mol uphill traversing the transition state **A6-TS** associated with a barrier of 22.1 kcal/mol. Although this reaction is a significantly more uphill process compared to the acetate mediated deprotonation, the relatively low reductive elimination barrier (24.9 kcal/mol) allows the product formation. In contrast to Path A, Path B barely forms the oxaspirocycle product(S,R) in both reductive elimination pathways as illustrated in Scheme S7b. The kinetic barriers of the two reductive elimination steps **B7-TS** and **B7'-TS** are both more than 33 kcal/mol which could be difficult to overcome in the given experimental condition.

### VI.3. Comparison of axial hydroxyl moiety and equatorial hydroxyl moiety complexes.

Table S4 represents the relative free energies of octahedral Pd(IV) reactant complexes which hold hydroxyl moiety as a ligand either in axial or equatorial position. In both reductive elimination pathways discussed in Section VI.2, the reactant complex with axial hydroxyl moiety is more stable than the complex with equatorial hydroxyl moiety. For example, the axial hydroxyl moiety containing **B6** is found at -31.7 kcal/mol and this complex is 1.4 kcal/mol more stable than **B6'** which accommodates equatorial hydroxyl moiety.

**Table S4.** Relative free energy of reactant complexes.

|                                            | Relative free energy (kcal/mol) |
|--------------------------------------------|---------------------------------|
| <b>A6</b><br>(axial hydroxyl moiety)       | -33.3                           |
| <b>A6'</b><br>(equatorial hydroxyl moiety) | -31.1                           |
| <b>B6</b><br>(axial hydroxyl moiety)       | -31.7                           |
| <b>B6'</b><br>(equatorial hydroxyl moiety) | -30.3                           |

Even though **B6** is more stable than **B6'**, the small free energy gap suggests a possibility of reductive elimination from **B6'**. As illustrated in Scheme S8, reactant complex **B6'** also has two possible reductive elimination mechanisms as discussed in Section VI.2. In both cases, the reductive elimination barriers are more than ~40 kcal/mol, which is in good agreement with the initial proposal of path B incapable of affording the product.

**Scheme S8.** Possible two reductive elimination steps with **B6'** which involves equatorial positioned hydroxyl moiety.

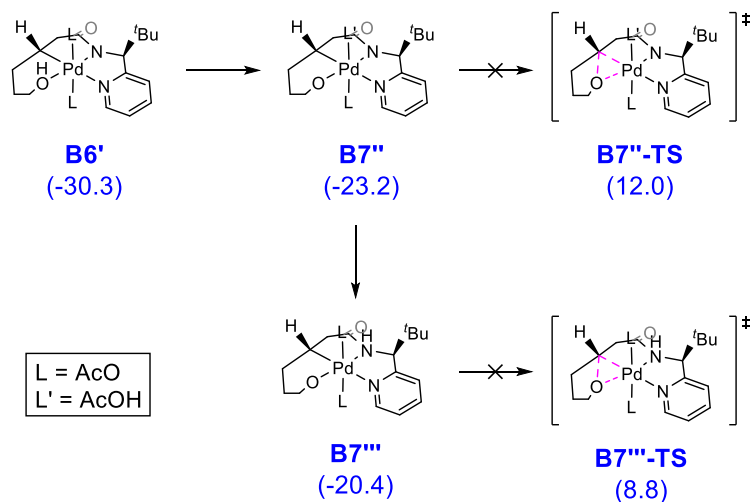

#### VI.4. Comparison of experimental and predicted KIE value.

The experimental KIE value (3.4) is in good agreement with the predicted KIE value (3.6) of **A3-TS** which is treated as a rate limiting step in the proposed mechanism. The predicted KIE value is gotten from below equations. (The pre-exponential factors  $A_H$  and  $A_D$  are assumed to be identical)

$$k_H = A_H \cdot e^{-E_a(H)/RT} \quad (1)$$

$$k_D = A_D \cdot e^{-E_a(D)/RT} \quad (2)$$

$$\frac{k_H}{k_D} = \exp\left[\frac{-(24.9-25.9) \times 10^3 \text{ cal mol}^{-1}}{(393.15 \text{ K})(1.98 \text{ cal mol}^{-1} \text{ K}^{-1})}\right] \approx 3.6 \quad (3)$$

**Table S5.** Computed energy components for DFT-optimized structures.

|                       | E(SCF)/(eV)          | ZPE/(kcal/mol)  | S(gas)/(cal/mol) | G(solv)/(kcal/mol) |
|-----------------------|----------------------|-----------------|------------------|--------------------|
|                       | cc-pVTZ(-f)/LACV3P** | 6-31G**/LACVP** | 6-31G**/LACVP**  | 6-31G**/LACVP**    |
| PhI(OAc) <sub>2</sub> | -19052.771           | 121.12          | 137.237          | -6.74              |
| Acetate               | -6220.611            | 30.18           | 68.855           | -43.12             |
| Acetic acid           | -6236.252            | 38.90           | 68.452           | -4.28              |
| Iodobenzene           | -6615.418            | 56.61           | 79.773           | -1.24              |
| <b>A1</b>             | -39991.673           | 321.83          | 205.725          | -9.73              |
| <b>A1-TS</b>          | -39991.218           | 319.12          | 195.059          | -8.78              |
| <b>A2</b>             | -39991.376           | 321.09          | 207.215          | -9.36              |

|                                |            |        |         |        |
|--------------------------------|------------|--------|---------|--------|
| <b>A3</b>                      | -33754.408 | 281.26 | 183.111 | -8.15  |
| <b>A3 (D)<sup>a</sup></b>      | -33754.408 | 268.70 | 185.813 | -8.15  |
| <b>A3-TS</b>                   | -33753.121 | 277.30 | 180.327 | -9.77  |
| <b>A3-TS (D)<sup>a</sup></b>   | -33753.121 | 265.69 | 182.795 | -9.77  |
| <b>A3-TS'</b>                  | -33753.082 | 277.29 | 179.649 | -9.68  |
| <b>A4</b>                      | -33753.821 | 280.57 | 177.063 | -9.00  |
| <b>A5</b>                      | -27517.109 | 240.72 | 149.895 | -8.74  |
| <b>A6</b>                      | -39956.867 | 306.37 | 195.759 | -9.13  |
| <b>A6'</b>                     | -39956.850 | 306.96 | 192.436 | -8.92  |
| <b>B4</b>                      | -33753.786 | 280.67 | 178.447 | -9.49  |
| <b>B5</b>                      | -27517.089 | 240.39 | 153.342 | -8.58  |
| <b>B6</b>                      | -39956.883 | 306.70 | 192.723 | -8.61  |
| <b>B6'</b>                     | -39956.840 | 306.62 | 192.185 | -8.25  |
| <b>A6-TS</b>                   | -39955.857 | 303.97 | 193.316 | -8.64  |
| <b>A7</b>                      | -39956.286 | 306.94 | 195.399 | -8.35  |
| <b>A7-TS</b>                   | -39955.605 | 305.63 | 202.079 | -10.66 |
| <b>A8</b>                      | -39957.539 | 307.86 | 202.792 | -12.59 |
| <b>A6-TS'</b>                  | -39956.784 | 304.01 | 188.068 | -8.89  |
| <b>A7'</b>                     | -39956.740 | 304.69 | 197.424 | -8.86  |
| <b>A7'-TS</b>                  | -39955.358 | 304.40 | 190.520 | -10.00 |
| <b>B6-TS</b>                   | -39955.811 | 304.21 | 192.024 | -8.13  |
| <b>B7</b>                      | -39956.06  | 307.25 | 192.745 | -8.29  |
| <b>B7-TS</b>                   | -39955.267 | 306.01 | 199.218 | -9.98  |
| <b>B8</b>                      | -39957.305 | 308.19 | 201.854 | -11.7  |
| <b>B6-TS'</b>                  | -39956.668 | 304.51 | 190.806 | -8.28  |
| <b>B7'</b>                     | -39956.726 | 305.45 | 194.032 | -7.96  |
| <b>B7'-TS</b>                  | -39955.315 | 303.19 | 185.417 | -8.18  |
| <b>B7''</b>                    | -39956.458 | 306.08 | 196.017 | -8.24  |
| <b>B7''-TS</b>                 | -39954.725 | 304.54 | 198.891 | -10.7  |
| <b>B7'''</b>                   | -39956.348 | 306.72 | 197.388 | -8.24  |
| <b>B7'''-TS</b>                | -39954.998 | 305.52 | 196.772 | -9.17  |
| <b>DG of A7<sup>b</sup></b>    | -24060.651 | -      | -       | -      |
| <b>MF of A7<sup>c</sup></b>    | -15862.286 | -      | -       | -      |
| <b>DG of A7-TS<sup>b</sup></b> | -24060.741 | -      | -       | -      |
| <b>MF of A7-TS<sup>c</sup></b> | -15862.558 | -      | -       | -      |



|                                |            |   |   |   |
|--------------------------------|------------|---|---|---|
| <b>DG of B7<sup>b</sup></b>    | -24060.571 | - | - | - |
| <b>MF of B7<sup>c</sup></b>    | -15862.330 | - | - | - |
| <b>DG of B7-TS<sup>b</sup></b> | -24060.403 | - | - | - |
| <b>MF of B7-TS<sup>c</sup></b> | -15862.638 | - | - | - |

<sup>a</sup> Deuterium labeled structure

<sup>b</sup> DG represents directing group fragment on fragment analysis

<sup>c</sup> MF represents metal fragment on fragment analysis

**Table S6.** Cartesian Coordinates of the Optimized Geometries.

|                       |              |              |               |             |              |              |              |
|-----------------------|--------------|--------------|---------------|-------------|--------------|--------------|--------------|
| =====                 |              |              |               | C           | 4.987535000  | -0.922109246 | -5.566299438 |
| PhI(OAc) <sub>2</sub> |              |              |               | H           | 5.385747910  | -0.525916934 | -4.627955914 |
| =====                 |              |              |               | H           | 5.192044735  | -0.182444051 | -6.345757961 |
| I                     | 0.729892313  | -0.125034913 | -4.710765362  | H           | 5.468802929  | -1.869301915 | -5.810998440 |
| C                     | 0.391378850  | -0.062632956 | -6.825250626  | =====       |              |              |              |
| C                     | -0.192873135 | 1.079063892  | -7.365354538  | Acetate     |              |              |              |
| C                     | 0.769336820  | -1.164299130 | -7.586305618  | =====       |              |              |              |
| C                     | -0.409921736 | 1.105225205  | -8.745039940  | O           | -1.109082937 | -0.363739520 | -4.025866508 |
| C                     | 0.544644713  | -1.107859254 | -8.963902473  | C           | -1.722265363 | 0.544827044  | -3.409200430 |
| C                     | -0.042677466 | 0.019144034  | -9.541406631  | O           | -1.514200449 | 1.783529162  | -3.380192280 |
| H                     | -0.495460987 | 1.903762341  | -6.731035233  | C           | -2.935598135 | 0.030390412  | -2.544684410 |
| H                     | 1.247502327  | -2.021296978 | -7.127019882  | H           | -2.582779169 | -0.704740286 | -1.807836175 |
| H                     | -0.866966963 | 1.983580112  | -9.190862656  | H           | -3.654690742 | -0.496092856 | -3.187753677 |
| H                     | 0.832901835  | -1.953957796 | -9.580510139  | H           | -3.451093912 | 0.844761670  | -2.020951986 |
| H                     | -0.213790134 | 0.051213261  | -10.613320351 | =====       |              |              |              |
| O                     | -1.432685494 | -0.246302128 | -4.452308178  | Acetic Acid |              |              |              |
| C                     | -2.109215260 | 0.894827127  | -4.490499020  | =====       |              |              |              |
| O                     | -1.634315133 | 1.991600752  | -4.750315189  | O           | -1.189250112 | -0.451623589 | -4.007086277 |
| C                     | -3.580447197 | 0.677237749  | -4.176667213  | C           | -1.782359481 | 0.586471319  | -3.364225388 |
| H                     | -3.684920549 | 0.214041039  | -3.191470861  | O           | -1.423819780 | 1.734156728  | -3.508269310 |
| H                     | -4.012209892 | -0.011573897 | -4.908491611  | C           | -2.909862995 | 0.110216707  | -2.482542992 |
| H                     | -4.106085777 | 1.632067561  | -4.202708721  | H           | -2.537628889 | -0.630090535 | -1.768487573 |
| O                     | 2.866925001  | 0.001486539  | -5.126682281  | H           | -3.674078703 | -0.380424351 | -3.092958689 |
| C                     | 3.486599445  | -1.128510833 | -5.442664623  | =====       |              |              |              |
| O                     | 2.941495657  | -2.208377838 | -5.623656750  | =====       |              |              |              |

|             |               |              |               |   |               |              |              |
|-------------|---------------|--------------|---------------|---|---------------|--------------|--------------|
| H           | -3.341027737  | 0.959585071  | -1.954370499  | C | -13.540340424 | 10.111306190 | 6.700473309  |
| H           | -0.481844962  | -0.064693049 | -4.549826622  | H | -14.632036209 | 10.037281990 | 6.663321495  |
| =====       |               |              |               |   |               |              |              |
| Iodobenzene |               |              |               |   |               |              |              |
| =====       |               |              |               |   |               |              |              |
| I           | 0.585881054   | 0.000001274  | -5.323780060  | H | -11.087696075 | 10.976212502 | 5.544841766  |
| C           | 0.585963070   | -0.000003732 | -7.461621761  | H | -11.474635124 | 12.700580597 | 5.468431950  |
| C           | 1.800370455   | -0.000004731 | -8.149033546  | H | -11.276094437 | 11.920030594 | 7.038527012  |
| C           | -0.628472805  | -0.000001400 | -8.149024963  | C | -13.676252365 | 11.443565369 | 4.570090771  |
| C           | 1.792553902   | 0.000000191  | -9.545749664  | H | -13.526807785 | 12.423899651 | 4.107697010  |
| C           | -0.620681524  | -0.000001637 | -9.545743942  | H | -13.137516975 | 10.707669258 | 3.966128588  |
| C           | 0.585932672   | -0.000001421 | -10.246473312 | H | -14.747251511 | 11.213717461 | 4.517947674  |
| H           | 2.740722656   | -0.000005596 | -7.608182430  | C | -13.917750359 | 12.604193687 | 6.774267197  |
| H           | -1.568820357  | 0.000000094  | -7.608172894  | H | -13.549708366 | 12.741209984 | 7.793830872  |
| H           | 2.737249613   | 0.000002832  | -10.081936836 | H | -13.770239830 | 13.552929878 | 6.247626781  |
| H           | -1.565378189  | -0.000003707 | -10.081929207 | H | -14.996090889 | 12.408987999 | 6.811233997  |
| H           | 0.585952818   | -0.000002416 | -11.332369804 | N | -13.141176224 | 10.030556679 | 8.138467789  |
| =====       |               |              |               |   |               |              |              |
| Al          |               |              |               |   |               |              |              |
| =====       |               |              |               |   |               |              |              |
| Pd          | -11.124900818 | 9.334115028  | 8.138036728   | O | -14.800006866 | 8.458147049  | 8.370102882  |
| N           | -11.858442307 | 8.336491585  | 6.509900093   | C | -13.777375221 | 9.217638969  | 10.426143646 |
| C           | -11.356338501 | 7.191663742  | 6.012373447   | H | -12.722473145 | 9.393379211  | 10.657051086 |
| C           | -13.005720139 | 8.863156319  | 6.018048286   | H | -14.319093704 | 10.111317635 | 10.766581535 |
| C           | -11.976983070 | 6.528129101  | 4.961808205   | C | -14.301967621 | 7.952832222  | 11.125789642 |
| C           | -13.673941612 | 8.230893135  | 4.972525597   | H | -15.245543480 | 7.661493301  | 10.652444839 |
| C           | -13.151133537 | 7.059062958  | 4.431394577   | H | -14.530614853 | 8.203256607  | 12.168151855 |
| H           | -10.473015785 | 6.808273315  | 6.504083633   | C | -13.312141418 | 6.773200512  | 11.098454475 |
| H           | -11.553784370 | 5.600877285  | 4.592780590   | H | -12.447785378 | 7.015580177  | 11.733226776 |
| H           | -14.605452538 | 8.648068428  | 4.608512878   | H | -13.801437378 | 5.908774853  | 11.568814278 |
| H           | -13.668351173 | 6.554502964  | 3.620894432   | C | -12.804297447 | 6.384001732  | 9.704098701  |
|             |               |              |               | H | -13.639425278 | 6.279878616  | 9.002589226  |
|             |               |              |               | H | -12.156597137 | 7.177752495  | 9.310110092  |
|             |               |              |               | C | -11.980782509 | 5.093330860  | 9.692945480  |
|             |               |              |               | H | -12.624189377 | 4.238750935  | 9.942380905  |
|             |               |              |               | H | -11.201969147 | 5.145403862  | 10.472314835 |

|       |               |              |              |   |               |              |              |
|-------|---------------|--------------|--------------|---|---------------|--------------|--------------|
| O     | -11.411437035 | 4.837849617  | 8.419452667  | H | -14.587095261 | 9.968997955  | 6.687845230  |
| H     | -10.654844284 | 5.444299221  | 8.347323418  | C | -13.158031464 | 11.441102028 | 6.068440914  |
| O     | -10.517429352 | 10.374478340 | 9.788789749  | C | -11.657498360 | 11.782939911 | 6.083649635  |
| C     | -11.054716110 | 11.505644798 | 10.106002808 | H | -11.058621407 | 11.012246132 | 5.587849140  |
| O     | -12.079739571 | 12.004362106 | 9.591137886  | H | -11.490777016 | 12.727564812 | 5.553144932  |
| C     | -10.330456734 | 12.236675262 | 11.222650528 | H | -11.277272224 | 11.907984734 | 7.100525856  |
| H     | -9.317094803  | 12.484747887 | 10.892881393 | C | -13.646767616 | 11.438411713 | 4.604896545  |
| H     | -10.236926079 | 11.579018593 | 12.091545105 | H | -13.530044556 | 12.438385963 | 4.175006866  |
| H     | -10.868770599 | 13.145758629 | 11.492501259 | H | -13.076704979 | 10.743220329 | 3.981471062  |
| O     | -9.166621208  | 8.904283524  | 7.840445518  | H | -14.708127975 | 11.172043800 | 4.535033226  |
| C     | -8.725522041  | 7.727986813  | 8.166059494  | C | -13.946781158 | 12.527437210 | 6.829072952  |
| O     | -9.423654556  | 6.774852276  | 8.535697937  | H | -13.631047249 | 12.620078087 | 7.869438648  |
| C     | -7.213573456  | 7.602643490  | 8.051383972  | H | -13.792185783 | 13.500745773 | 6.350675106  |
| H     | -6.746695518  | 8.186957359  | 8.850557327  | H | -15.022111893 | 12.315612793 | 6.814794540  |
| H     | -6.868558884  | 8.015636444  | 7.099661350  | N | -13.081026077 | 9.924983025  | 8.141544342  |
| H     | -6.918562889  | 6.556614876  | 8.143955231  | C | -13.974979401 | 9.120692253  | 8.898537636  |
| H     | -12.906431198 | 10.934012413 | 8.634584427  | O | -14.971014023 | 8.620772362  | 8.393921852  |
|       |               |              |              | C | -13.643351555 | 8.994672775  | 10.380129814 |
|       |               |              |              | H | -12.582236290 | 8.748808861  | 10.485913277 |
|       |               |              |              | H | -13.770713806 | 10.002435684 | 10.797379494 |
|       |               |              |              | C | -14.517123222 | 7.973511696  | 11.138242722 |
|       |               |              |              | H | -15.411538124 | 7.758765697  | 10.543229103 |
|       |               |              |              | H | -14.866587639 | 8.444109917  | 12.064723015 |
|       |               |              |              | C | -13.807592392 | 6.660508156  | 11.520750046 |
|       |               |              |              | H | -12.853137970 | 6.892955780  | 12.007238388 |
|       |               |              |              | H | -14.424968719 | 6.153831005  | 12.274388313 |
|       |               |              |              | C | -13.540452957 | 5.648402214  | 10.392055511 |
|       |               |              |              | H | -13.135892868 | 4.738366604  | 10.853585243 |
|       |               |              |              | H | -14.486264229 | 5.369618893  | 9.907109261  |
|       |               |              |              | C | -12.563735008 | 6.110233784  | 9.306492805  |
|       |               |              |              | H | -13.068763733 | 6.813063145  | 8.627203941  |
|       |               |              |              | H | -12.273412704 | 5.242335320  | 8.692914009  |
|       |               |              |              | O | -11.428833008 | 6.710025311  | 9.910943985  |
| ===== |               |              |              |   |               |              |              |
| A1-TS |               |              |              |   |               |              |              |
| ===== |               |              |              |   |               |              |              |
| Pd    | -11.099734306 | 9.236200333  | 8.099966049  | H | -15.411538124 | 7.758765697  | 10.543229103 |
| N     | -11.816747665 | 8.294427872  | 6.449278355  | H | -14.866587639 | 8.444109917  | 12.064723015 |
| C     | -11.298861504 | 7.178389072  | 5.900973797  | C | -13.807592392 | 6.660508156  | 11.520750046 |
| C     | -12.964993477 | 8.839022636  | 5.976000786  | H | -12.853137970 | 6.892955780  | 12.007238388 |
| C     | -11.909317017 | 6.560654640  | 4.817319870  | H | -14.424968719 | 6.153831005  | 12.274388313 |
| C     | -13.625730515 | 8.240732193  | 4.903393269  | C | -13.540452957 | 5.648402214  | 10.392055511 |
| C     | -13.091008186 | 7.100679398  | 4.311110497  | H | -13.135892868 | 4.738366604  | 10.853585243 |
| H     | -10.416741371 | 6.777767181  | 6.385521412  | H | -14.486264229 | 5.369618893  | 9.907109261  |
| H     | -11.470575333 | 5.661465168  | 4.399290562  | C | -12.563735008 | 6.110233784  | 9.306492805  |
| H     | -14.559967041 | 8.665472031  | 4.556241989  | H | -13.068763733 | 6.813063145  | 8.627203941  |
| H     | -13.601397514 | 6.628153801  | 3.477082253  | H | -12.273412704 | 5.242335320  | 8.692914009  |
| C     | -13.496157646 | 10.051637650 | 6.716608524  | O | -11.428833008 | 6.710025311  | 9.910943985  |

|       |               |              |              |   |               |              |              |
|-------|---------------|--------------|--------------|---|---------------|--------------|--------------|
| H     | -10.670656204 | 6.658707619  | 9.291468620  | C | -13.313531876 | 11.433545113 | 6.110986710  |
| O     | -10.485818863 | 10.344867706 | 9.761965752  | C | -11.824951172 | 11.786508560 | 5.943912983  |
| C     | -11.107208252 | 11.373687744 | 10.125220299 | H | -11.283759117 | 11.015223503 | 5.385897636  |
| O     | -12.231717110 | 11.767813683 | 9.628263474  | H | -11.726196289 | 12.729153633 | 5.393375874  |
| C     | -10.502202034 | 12.250664711 | 11.189567566 | H | -11.327380180 | 11.917515755 | 6.908355713  |
| H     | -9.987560272  | 13.136795044 | 10.655062675 | C | -13.975354195 | 11.409628868 | 4.718292713  |
| H     | -9.721372604  | 11.658057213 | 11.773100853 | H | -13.930062294 | 12.406562805 | 4.267876148  |
| H     | -11.329149246 | 12.655622482 | 11.854762077 | H | -13.472700119 | 10.717245102 | 4.036222458  |
| O     | -9.118387222  | 8.835805893  | 7.805195808  | H | -15.032240868 | 11.124392509 | 4.781333923  |
| C     | -8.623135567  | 7.652081966  | 7.958981991  | C | -14.016034126 | 12.515973091 | 6.956055164  |
| O     | -9.269863129  | 6.617400646  | 8.206568718  | H | -13.577805519 | 12.613837242 | 7.950974941  |
| C     | -7.111183643  | 7.599266052  | 7.804234028  | H | -13.930229187 | 13.489668846 | 6.460988998  |
| H     | -6.651886940  | 8.032720566  | 8.698776245  | H | -15.080964088 | 12.290956497 | 7.078808784  |
| H     | -6.792529106  | 8.198200226  | 6.947394848  | N | -12.951786995 | 9.951748848  | 8.177051544  |
| H     | -6.781032085  | 6.565279007  | 7.696671009  | C | -13.827850342 | 9.371475220  | 9.117435455  |
| H     | -12.660794258 | 11.005341530 | 8.898422241  | O | -15.040693283 | 9.325507164  | 8.947225571  |
| ===== |               |              |              | C | -13.187373161 | 8.731005669  | 10.333152771 |
| A2    |               |              |              | H | -12.181827545 | 9.117132187  | 10.522663116 |
| ===== |               |              |              | H | -13.813340187 | 8.933317184  | 11.207763672 |
| Pd    | -11.012580872 | 9.239967346  | 7.970491409  | C | -13.120354652 | 7.212862968  | 10.049508095 |
| N     | -11.868062973 | 8.309853554  | 6.410300255  | H | -12.732576370 | 7.046181679  | 9.040457726  |
| C     | -11.369425774 | 7.204175472  | 5.831809521  | H | -14.142579079 | 6.815396309  | 10.057128906 |
| C     | -13.060308456 | 8.837680817  | 6.035214424  | C | -12.237597466 | 6.423687935  | 11.023742676 |
| C     | -12.056353569 | 6.562722206  | 4.809545517  | H | -11.246129036 | 6.893891335  | 11.076518059 |
| C     | -13.794730186 | 8.215544701  | 5.026484966  | H | -12.667693138 | 6.475046158  | 12.032740593 |
| C     | -13.287626266 | 7.076006889  | 4.405132771  | C | -12.086217880 | 4.953576088  | 10.581343651 |
| H     | -10.424377441 | 6.850295067  | 6.220545769  | H | -11.898069382 | 4.308786869  | 11.450744629 |
| H     | -11.637450218 | 5.668773651  | 4.361854076  | H | -13.031538963 | 4.610130310  | 10.139517784 |
| H     | -14.760470390 | 8.620501518  | 4.748693943  | C | -10.939340591 | 4.726215363  | 9.582448959  |
| H     | -13.857452393 | 6.584724426  | 3.621967793  | H | -10.990382195 | 3.698923111  | 9.197173119  |
| C     | -13.540038109 | 10.050102234 | 6.814363003  | H | -9.979932785  | 4.831629753  | 10.110674858 |
| H     | -14.624070168 | 9.945724487  | 6.928134441  | O | -10.965151787 | 5.611726761  | 8.466762543  |
|       |               |              |              | H | -10.432437897 | 6.382790565  | 8.748589516  |

|       |               |              |              |   |              |              |              |
|-------|---------------|--------------|--------------|---|--------------|--------------|--------------|
| O     | -10.167270660 | 10.375287056 | 9.534190178  | H | 2.201098680  | -2.850970984 | 3.441314697  |
| C     | -10.689760208 | 11.428086281 | 9.953547478  | H | 1.429424405  | -2.108729362 | 4.840576649  |
| O     | -11.867156982 | 11.856976509 | 9.599838257  | H | 0.528320849  | -3.266005993 | 3.836265326  |
| C     | -9.934918404  | 12.304474831 | 10.913825035 | C | 0.689351499  | -1.821871161 | 1.453263402  |
| H     | -9.245205879  | 12.932444572 | 10.339155197 | H | -0.064905614 | -2.606232882 | 1.356857419  |
| H     | -9.342763901  | 11.682239532 | 11.586652756 | H | 0.419757187  | -1.017063618 | 0.764384985  |
| H     | -10.617399216 | 12.946800232 | 11.470979691 | H | 1.662447333  | -2.220501423 | 1.144352317  |
| O     | -9.120162010  | 8.609143257  | 7.493238926  | C | -0.666055143 | -0.167311981 | 4.708097935  |
| C     | -8.523677826  | 7.902511120  | 8.407685280  | C | -0.670237958 | -0.836212873 | 5.931582928  |
| O     | -9.087153435  | 7.370431900  | 9.376768112  | N | -0.686103284 | 1.184709907  | 4.687633038  |
| C     | -7.023168564  | 7.775155067  | 8.205159187  | C | -0.677653551 | -0.104675949 | 7.115978241  |
| H     | -6.547033787  | 8.715664864  | 8.502515793  | H | -0.689124823 | -1.919244051 | 5.942255497  |
| H     | -6.791626453  | 7.608893871  | 7.150043488  | C | -0.696578383 | 1.905814767  | 5.820694923  |
| H     | -6.628936291  | 6.963539600  | 8.817935944  | C | -0.682187140 | 1.290628076  | 7.064930439  |
| H     | -12.348375320 | 11.176298141 | 8.961027145  | H | -0.690469921 | -0.618618846 | 8.072467804  |
|       |               |              |              | H | -0.720616460 | 2.983646870  | 5.697377682  |
|       |               |              |              | H | -0.692760706 | 1.893169045  | 7.966126442  |
|       |               |              |              | H | -3.311588526 | -0.034808829 | -0.240845039 |
|       |               |              |              | H | -2.098869562 | 1.226786256  | 0.073850542  |
|       |               |              |              | H | -4.386686802 | 2.098967791  | 0.481888652  |
|       |               |              |              | C | -4.984862328 | 0.639411569  | 1.988301158  |
|       |               |              |              | H | -4.571930408 | -0.330040634 | 2.290277958  |
|       |               |              |              | H | -5.810520649 | 0.395361543  | 1.309218407  |
|       |               |              |              | C | -5.544400692 | 1.335763812  | 3.241088390  |
|       |               |              |              | H | -6.019096375 | 2.290215731  | 2.971385717  |
|       |               |              |              | H | -6.326592922 | 0.701759398  | 3.676565170  |
|       |               |              |              | C | -4.482124329 | 1.614291072  | 4.317820072  |
|       |               |              |              | H | -3.807594776 | 2.423266411  | 3.992965698  |
|       |               |              |              | H | -4.969062805 | 1.959247470  | 5.236767292  |
|       |               |              |              | O | -3.733579874 | 0.459229797  | 4.680379868  |
|       |               |              |              | H | -3.197201490 | 0.216868490  | 3.912031174  |
|       |               |              |              | O | -0.495983541 | 4.102625370  | 3.045401812  |
|       |               |              |              | C | -0.695035040 | 4.238914967  | 1.790154934  |
| ===== |               |              |              |   |              |              |              |
| A3    |               |              |              |   |              |              |              |
| ===== |               |              |              |   |              |              |              |
| C     | -3.913718224  | 1.454022288  | 1.232185841  | H | -4.386686802 | 2.098967791  | 0.481888652  |
| C     | -2.849029779  | 0.578483701  | 0.537572384  | C | -4.984862328 | 0.639411569  | 1.988301158  |
| C     | -2.176861286  | -0.407004446 | 1.490347505  | H | -4.571930408 | -0.330040634 | 2.290277958  |
| O     | -2.439046144  | -1.615240335 | 1.434572577  | H | -5.810520649 | 0.395361543  | 1.309218407  |
| N     | -1.307078719  | 0.102690689  | 2.419190884  | C | -5.544400692 | 1.335763812  | 3.241088390  |
| Pd    | -0.892997861  | 2.016496658  | 2.856301785  | H | -6.019096375 | 2.290215731  | 2.971385717  |
| C     | -0.664755285  | -0.833206058 | 3.353765726  | H | -6.326592922 | 0.701759398  | 3.676565170  |
| H     | -1.281064272  | -1.738680363 | 3.396658182  | C | -4.482124329 | 1.614291072  | 4.317820072  |
| C     | 0.778524935   | -1.298646808 | 2.899320841  | H | -3.807594776 | 2.423266411  | 3.992965698  |
| C     | 1.802174091   | -0.151524723 | 2.956271410  | H | -4.969062805 | 1.959247470  | 5.236767292  |
| H     | 2.782216787   | -0.513170004 | 2.626105070  | O | -3.733579874 | 0.459229797  | 4.680379868  |
| H     | 1.512199879   | 0.673734546  | 2.298590183  | H | -3.197201490 | 0.216868490  | 3.912031174  |
| H     | 1.919508219   | 0.247489154  | 3.969848871  | O | -0.495983541 | 4.102625370  | 3.045401812  |
| C     | 1.254484653   | -2.444850445 | 3.813496113  | C | -0.695035040 | 4.238914967  | 1.790154934  |

|       |              |              |             |        |              |              |             |
|-------|--------------|--------------|-------------|--------|--------------|--------------|-------------|
| O     | -1.000387073 | 3.201938868  | 1.106482387 | N      | 2.044242620  | 1.478012443  | 5.421692371 |
| H     | -3.397805929 | 2.135796547  | 1.915635467 | C      | 4.611793995  | 0.624360025  | 5.961943626 |
| C     | -0.596642733 | 5.583114147  | 1.130582571 | H      | 3.716233015  | -1.329116106 | 6.180482388 |
| H     | -1.606455326 | 5.972912312  | 0.963536084 | C      | 3.056414127  | 2.360633850  | 5.425350189 |
| H     | -0.047059558 | 6.277641296  | 1.767599702 | C      | 4.364636421  | 1.967898846  | 5.678030014 |
| H     | -0.110714182 | 5.483003139  | 0.157341376 | H      | 5.617493153  | 0.286535025  | 6.194250584 |
|       |              |              |             | H      | 2.775378704  | 3.390826225  | 5.233410835 |
|       |              |              |             | H      | 5.161496162  | 2.703536034  | 5.671247959 |
|       |              |              |             | H      | -2.052124739 | 1.129798412  | 7.751819611 |
|       |              |              |             | H      | -3.199148893 | 0.191684157  | 6.816333294 |
| A3-TS |              |              |             | H      | -1.612384200 | 3.093165636  | 5.755334854 |
|       |              |              |             | C      | -2.668050766 | 1.366360545  | 4.284121990 |
| C     | -2.228770018 | 1.806027055  | 5.692164421 | H      | -2.045628548 | 0.530448377  | 3.946181059 |
| C     | -2.224452734 | 0.689907789  | 6.761240959 | H      | -2.501420259 | 2.184921503  | 3.576129198 |
| C     | -1.161732435 | -0.388577640 | 6.554758072 | C      | -4.145247936 | 0.949297011  | 4.194027901 |
| O     | -1.244640112 | -1.526276708 | 7.022696495 | H      | -4.353748322 | 0.116719387  | 4.877148628 |
| N     | -0.126601875 | 0.065765508  | 5.803149223 | H      | -4.789311409 | 1.785518289  | 4.496652126 |
| Pd    | 0.032338198  | 2.000046730  | 5.446656227 | C      | -4.538387299 | 0.513085723  | 2.787428141 |
| C     | 1.056925893  | -0.747009635 | 5.553360462 | H      | -3.907776117 | -0.339664549 | 2.481407881 |
| H     | 1.114545465  | -1.522975206 | 6.328382492 | H      | -5.585094452 | 0.166092664  | 2.782610178 |
| C     | 0.996350467  | -1.498811126 | 4.159935474 | O      | -4.361187935 | 1.624208093  | 1.911786318 |
| C     | 1.011006713  | -0.503927231 | 2.985873699 | H      | -4.535773754 | 1.329085231  | 1.010123014 |
| H     | 0.921531737  | -1.045348763 | 2.037380457 | O      | 0.468255550  | 4.026094913  | 5.054861546 |
| H     | 0.177824914  | 0.201336026  | 3.052185297 | C      | -0.486114204 | 4.821246147  | 5.317986488 |
| H     | 1.940237284  | 0.075365894  | 2.950602055 | O      | -1.616488099 | 4.430103779  | 5.739424229 |
| C     | 2.190104246  | -2.463414907 | 4.024176121 | H      | -2.985643148 | 2.525337696  | 6.043661118 |
| H     | 2.076701403  | -3.071204185 | 3.120086432 | C      | -0.277863622 | 6.301229477  | 5.102748871 |
| H     | 3.144050598  | -1.933858633 | 3.938933134 | H      | -0.604475439 | 6.849171638  | 5.990128040 |
| H     | 2.249629021  | -3.149729967 | 4.877583981 | H      | 0.766627610  | 6.521032333  | 4.881259918 |
| C     | -0.304857910 | -2.322431087 | 4.115213871 | H      | -0.905777097 | 6.626123428  | 4.267128944 |
| H     | -0.388171107 | -2.986874819 | 4.978904247 |        |              |              |             |
| H     | -1.182935119 | -1.673035383 | 4.121523380 |        |              |              |             |
| H     | -0.331136793 | -2.921772242 | 3.198060989 |        |              |              |             |
| C     | 2.264164686  | 0.160293236  | 5.655278683 |        |              |              |             |
| C     | 3.554721832  | -0.282276154 | 5.952863216 | A3-TS' |              |              |             |

|    |              |              |             |    |              |              |             |  |  |
|----|--------------|--------------|-------------|----|--------------|--------------|-------------|--|--|
|    |              |              |             | H  | -3.124596119 | 0.164538339  | 7.132944107 |  |  |
| C  | -2.294480562 | 1.774702072  | 5.901708603 | H  | -2.341165304 | 1.247861266  | 4.940935135 |  |  |
| C  | -2.192077637 | 0.734800220  | 7.030408382 | C  | -3.596113443 | 2.607645273  | 5.952387333 |  |  |
| C  | -1.060107589 | -0.276955903 | 6.821435452 | H  | -3.631302118 | 3.239623308  | 6.847813129 |  |  |
| O  | -0.991666436 | -1.345821142 | 7.432817459 | H  | -4.435617447 | 1.905150294  | 6.033290386 |  |  |
| N  | -0.168192327 | 0.125196695  | 5.874979973 | C  | -3.803386211 | 3.468854189  | 4.701943398 |  |  |
| Pd | -0.119043283 | 2.034645081  | 5.379831314 | H  | -2.944733620 | 4.133403778  | 4.552793503 |  |  |
| C  | 1.016822577  | -0.662046075 | 5.560715199 | H  | -3.863436460 | 2.822824955  | 3.816418409 |  |  |
| H  | 1.196274281  | -1.361146688 | 6.388646603 | C  | -5.061985016 | 4.323242664  | 4.769668579 |  |  |
| C  | 0.818226039  | -1.537186265 | 4.256388664 | H  | -5.000439167 | 4.992312908  | 5.645268917 |  |  |
| C  | 0.655212164  | -0.647928834 | 3.011305571 | H  | -5.127652645 | 4.961097717  | 3.871969461 |  |  |
| H  | 0.464325428  | -1.269851446 | 2.129665375 | O  | -6.184326172 | 3.450463533  | 4.863864422 |  |  |
| H  | -0.186398223 | 0.041087154  | 3.128001690 | H  | -6.976503372 | 3.986773252  | 4.988120079 |  |  |
| H  | 1.553677320  | -0.053310253 | 2.811163902 | O  | 0.137242109  | 4.112335682  | 5.008307934 |  |  |
| C  | 2.018167496  | -2.482506037 | 4.056225777 | C  | -0.551251352 | 4.794904709  | 5.821567059 |  |  |
| H  | 1.816529393  | -3.169437885 | 3.227278948 | O  | -1.425010920 | 4.282859325  | 6.599896908 |  |  |
| H  | 2.936765671  | -1.941082001 | 3.808971643 | H  | -1.580299020 | 3.058137655  | 6.241549969 |  |  |
| H  | 2.203731775  | -3.090050220 | 4.950231075 | C  | -0.371921897 | 6.292220592  | 5.861631870 |  |  |
| C  | -0.453617215 | -2.385167360 | 4.447702885 | H  | -0.426319063 | 6.647723675  | 6.892600536 |  |  |
| H  | -0.412277371 | -2.965131521 | 5.373436928 | H  | 0.574027538  | 6.579358578  | 5.401685715 |  |  |
| H  | -1.340964913 | -1.749954939 | 4.499141693 | H  | -1.193676829 | 6.755974293  | 5.305395126 |  |  |
| H  | -0.573383033 | -3.070699692 | 3.601341248 |    |              |              |             |  |  |
| C  | 2.192303419  | 0.284459144  | 5.436831474 |    |              |              |             |  |  |
| C  | 3.524753809  | -0.100332081 | 5.604790211 | A4 |              |              |             |  |  |
| N  | 1.899763703  | 1.573089600  | 5.132060528 |    |              |              |             |  |  |
| C  | 4.543071747  | 0.830219090  | 5.415201664 | C  | -1.914594293 | 1.773741841  | 5.732183456 |  |  |
| H  | 3.749413729  | -1.121039867 | 5.890036583 | C  | -2.073543072 | 0.584761798  | 6.701739311 |  |  |
| C  | 2.874589682  | 2.478618145  | 4.949247837 | C  | -1.022916794 | -0.511973977 | 6.484173298 |  |  |
| C  | 4.216996670  | 2.141658068  | 5.066778660 | O  | -1.110962629 | -1.651260018 | 6.945301056 |  |  |
| H  | 5.580703259  | 0.537036955  | 5.545610428 | N  | 0.020481899  | -0.046549264 | 5.741889000 |  |  |
| H  | 2.538310289  | 3.485382795  | 4.722829819 | Pd | 0.111967482  | 1.891654134  | 5.373106480 |  |  |
| H  | 4.981429577  | 2.894725800  | 4.909023762 | C  | 1.206549287  | -0.854808748 | 5.519300938 |  |  |
| H  | -2.028103113 | 1.227313042  | 7.998000622 | H  | 1.235193729  | -1.637594104 | 6.288995266 |  |  |

|   |              |              |             |       |              |              |             |
|---|--------------|--------------|-------------|-------|--------------|--------------|-------------|
| C | 1.192556143  | -1.607640743 | 4.125977516 | H     | -0.707281232 | 1.966583371  | 2.838304996 |
| C | 1.266263604  | -0.622321367 | 2.946710825 | H     | -1.993180752 | 1.677369952  | 1.652116776 |
| H | 1.199265480  | -1.166146874 | 1.997655869 | O     | -1.229024291 | 3.628829956  | 1.681104541 |
| H | 0.436340302  | 0.088431805  | 2.988193989 | H     | -0.493841171 | 3.425986528  | 1.088273883 |
| H | 2.205451965  | -0.057589777 | 2.940436602 | O     | 0.089487500  | 4.033299923  | 4.832010269 |
| C | 2.375983715  | -2.591202736 | 4.043855667 | C     | 0.680756927  | 4.395792007  | 3.814363241 |
| H | 2.311288595  | -3.181419611 | 3.123058558 | O     | 1.460890889  | 3.576555014  | 3.104933262 |
| H | 3.342384577  | -2.076812029 | 4.032917976 | H     | -2.154574394 | 2.727833033  | 6.218419075 |
| H | 2.369591951  | -3.292852640 | 4.886499882 | C     | 0.573232532  | 5.777763844  | 3.250775814 |
| C | -0.121841051 | -2.403847218 | 4.032119274 | H     | -0.226488635 | 5.740866184  | 2.504142761 |
| H | -0.257326275 | -3.052026272 | 4.901432991 | H     | 0.299120486  | 6.478243828  | 4.039678574 |
| H | -0.980864584 | -1.729306817 | 3.993941069 | H     | 1.502339005  | 6.078006744  | 2.762627363 |
| H | -0.123855457 | -3.015556097 | 3.122625589 |       |              |              |             |
| C | 2.434863329  | 0.025649067  | 5.680323601 | ===== |              |              |             |
| C | 3.644097805  | -0.481822312 | 6.165432453 | A5    |              |              |             |
| N | 2.329223156  | 1.334780812  | 5.338739872 | ===== |              |              |             |
| C | 4.754908562  | 0.349607080  | 6.275599957 | C     | -1.966840625 | 1.626308203  | 5.765863419 |
| H | 3.698404789  | -1.523974061 | 6.459043026 | C     | -2.298043728 | 0.168956280  | 6.122776508 |
| C | 3.403046370  | 2.134418249  | 5.447963238 | C     | -1.053411365 | -0.691768885 | 6.367093563 |
| C | 4.638319969  | 1.688024163  | 5.901893616 | O     | -1.059756398 | -1.737627864 | 7.020220280 |
| H | 5.695331573  | -0.039438996 | 6.654992104 | N     | 0.020839918  | -0.190054446 | 5.697404385 |
| H | 3.251406431  | 3.170344353  | 5.158499241 | Pd    | -0.031931445 | 1.695827365  | 5.102100849 |
| H | 5.475430012  | 2.374430180  | 5.970637798 | C     | 1.289875865  | -0.898997188 | 5.674114227 |
| H | -1.955685854 | 0.921663761  | 7.738990784 | H     | 1.350730181  | -1.538847208 | 6.564852715 |
| H | -3.069432735 | 0.125643224  | 6.637936115 | C     | 1.430010319  | -1.863115311 | 4.422016144 |
| H | 1.408846974  | 2.679756641  | 3.508771181 | C     | 1.472514272  | -1.069625854 | 3.104655027 |
| C | -2.766772985 | 1.615199447  | 4.469376564 | H     | 1.483190060  | -1.759575129 | 2.252974033 |
| H | -3.818169832 | 1.559558034  | 4.792365551 | H     | 0.593330324  | -0.424768746 | 3.013774872 |
| H | -2.552452803 | 0.641739011  | 4.004980564 | H     | 2.364387512  | -0.437891841 | 3.033942938 |
| C | -2.623141289 | 2.745423079  | 3.428684711 | C     | 2.710547209  | -2.710295916 | 4.553176880 |
| H | -3.582971811 | 2.953966856  | 2.942222357 | H     | 2.764874935  | -3.437916517 | 3.735800266 |
| H | -2.313836813 | 3.669449329  | 3.929933786 | H     | 3.618273497  | -2.100091219 | 4.505974770 |
| C | -1.588261962 | 2.418979645  | 2.359316587 | H     | 2.722405910  | -3.271120071 | 5.495707989 |





|       |              |              |              |    |              |              |             |
|-------|--------------|--------------|--------------|----|--------------|--------------|-------------|
| H     | -3.825932264 | 1.600128889  | 4.592620850  | N  | -0.069912061 | -0.224534258 | 5.517429829 |
| H     | -2.656883478 | 0.412562698  | 4.031973362  | Pd | -0.175450534 | 1.722521544  | 5.101514816 |
| C     | -2.364569426 | 2.399224758  | 3.212935925  | C  | 1.252000093  | -0.826936245 | 5.709445477 |
| H     | -3.196983576 | 2.490862608  | 2.504982710  | H  | 1.275721312  | -1.295175076 | 6.701531887 |
| H     | -2.152716398 | 3.402435541  | 3.601395845  | C  | 1.503329396  | -1.972407103 | 4.640330315 |
| C     | -1.160635352 | 1.878740788  | 2.433273792  | C  | 1.538662314  | -1.387240171 | 3.218379974 |
| H     | -1.379394650 | 0.888765335  | 2.016773701  | H  | 1.630549669  | -2.196954489 | 2.485411644 |
| H     | -0.915879369 | 2.555903196  | 1.606210589  | H  | 0.619164348  | -0.832977593 | 3.016123772 |
| O     | 0.022487476  | 1.735374808  | 3.233670235  | H  | 2.385324001  | -0.707986712 | 3.075093269 |
| H     | 0.585813165  | 2.605228901  | 3.156620502  | C  | 2.829522133  | -2.695111752 | 4.943591118 |
| H     | -2.225019217 | 2.614506483  | 6.137033463  | H  | 2.945374966  | -3.551186085 | 4.270222664 |
| O     | 0.059504531  | 2.201665163  | 7.346446991  | H  | 3.698676109  | -2.047078609 | 4.800437927 |
| C     | 0.755405366  | 1.515677691  | 8.234077454  | H  | 2.850931883  | -3.078975916 | 5.970799446 |
| O     | 1.396534204  | 0.494681090  | 8.048140526  | C  | 0.363299578  | -3.006403446 | 4.725320339 |
| C     | 0.651423037  | 2.180001259  | 9.605876923  | H  | 0.244295776  | -3.392607927 | 5.740277290 |
| H     | -0.394927025 | 2.215612173  | 9.923281670  | H  | -0.590863883 | -2.569073677 | 4.422008038 |
| H     | 1.013855815  | 3.210288048  | 9.550463676  | H  | 0.577524841  | -3.842635393 | 4.050111771 |
| H     | 1.240202904  | 1.609409928  | 10.324938774 | C  | 2.336566448  | 0.232383996  | 5.637636662 |
| O     | -0.015871903 | 3.925786257  | 5.208706856  | C  | 3.563910961  | 0.082157932  | 6.286304474 |
| C     | 0.650156260  | 4.517470360  | 4.287005901  | N  | 2.091496468  | 1.314632177  | 4.872698784 |
| O     | 1.173142791  | 3.950007677  | 3.290987730  | C  | 4.563024998  | 1.031973839  | 6.079936028 |
| C     | 0.795123041  | 6.017695427  | 4.452440262  | H  | 3.728911400  | -0.771464229 | 6.933856964 |
| H     | 1.295405746  | 6.230676174  | 5.401684284  | C  | 3.047873735  | 2.230469465  | 4.674635410 |
| H     | -0.197431490 | 6.475679398  | 4.499592781  | C  | 4.314681053  | 2.113514185  | 5.237171650 |
| H     | 1.362683773  | 6.440534115  | 3.622829437  | H  | 5.524412632  | 0.927402496  | 6.574970722 |
|       |              |              |              | H  | 2.767246723  | 3.072539568  | 4.053004742 |
|       |              |              |              | H  | 5.065989017  | 2.872955799  | 5.050373077 |
|       |              |              |              | H  | -3.174105883 | -0.068687558 | 6.648842335 |
|       |              |              |              | H  | -2.786275148 | -0.312449425 | 4.936760902 |
|       |              |              |              | C  | -3.081541538 | 2.354045391  | 4.783057690 |
|       |              |              |              | H  | -4.106331348 | 2.171624899  | 5.146550179 |
|       |              |              |              | H  | -3.029416084 | 1.923252106  | 3.775429010 |
|       |              |              |              | C  | -2.841073751 | 3.870568752  | 4.737906456 |
| ===== |              |              |              |    |              |              |             |
| A6'   |              |              |              |    |              |              |             |
| ===== |              |              |              |    |              |              |             |
| C     | -2.165241480 | 1.602782845  | 5.717176437  |    |              |              |             |
| C     | -2.416851759 | 0.112982862  | 5.878585339  |    |              |              |             |
| C     | -1.147355914 | -0.664269984 | 6.241081715  |    |              |              |             |
| O     | -1.131656647 | -1.634843230 | 6.990458012  |    |              |              |             |





|    |              |              |             |     |              |              |             |
|----|--------------|--------------|-------------|-----|--------------|--------------|-------------|
| C  | -2.356601715 | 1.799936771  | 5.326676846 | H   | -2.629434586 | 2.335783482  | 4.418416500 |
| C  | -2.646235466 | 0.302476257  | 5.274417877 | C   | -2.824834585 | 2.516543865  | 6.575221539 |
| C  | -1.487948775 | -0.579253554 | 5.768611431 | H   | -3.922096014 | 2.418809891  | 6.573432446 |
| O  | -1.657188892 | -1.661039352 | 6.327171803 | H   | -2.608440876 | 3.587075949  | 6.486968994 |
| N  | -0.279570311 | -0.054802082 | 5.436064243 | C   | -2.286086798 | 1.971076965  | 7.909704685 |
| Pd | -0.281777442 | 1.922226787  | 5.179493904 | H   | -2.963411808 | 2.253768921  | 8.724236488 |
| C  | 0.977719247  | -0.767133117 | 5.658132553 | H   | -2.249965429 | 0.875868082  | 7.899635792 |
| H  | 0.847191215  | -1.418095827 | 6.532536983 | C   | -0.913244069 | 2.529806137  | 8.258231163 |
| C  | 1.359704375  | -1.701035976 | 4.432468414 | H   | -0.966759205 | 3.622581482  | 8.351726532 |
| C  | 1.590042472  | -0.872648001 | 3.156979561 | H   | -0.566349387 | 2.115790606  | 9.212375641 |
| H  | 1.821141005  | -1.541123629 | 2.319750547 | O   | 0.088382185  | 2.212087154  | 7.275234699 |
| H  | 0.692703843  | -0.302656263 | 2.908132792 | H   | 0.608258247  | 3.090209246  | 7.086471558 |
| H  | 2.419561148  | -0.167064399 | 3.262951374 | O   | -0.561725736 | 1.723174930  | 3.209856033 |
| C  | 2.628208399  | -2.510809422 | 4.765402794 | C   | 0.326672077  | 2.373552561  | 2.469655752 |
| H  | 2.821574450  | -3.236290693 | 3.968122959 | O   | 1.292243600  | 3.001714468  | 2.877019882 |
| H  | 3.515060902  | -1.876952410 | 4.852487564 | C   | 0.007999081  | 2.211181879  | 0.989381433 |
| H  | 2.513207674  | -3.072955132 | 5.700283527 | H   | -1.035152316 | 2.471676588  | 0.791978836 |
| C  | 0.212040320  | -2.696721315 | 4.171594620 | H   | 0.151224405  | 1.165353775  | 0.700180769 |
| H  | -0.049175892 | -3.259636402 | 5.070816517 | H   | 0.674701452  | 2.848412991  | 0.406861126 |
| H  | -0.690269530 | -2.183996439 | 3.830879450 | O   | -0.468089134 | 3.997953176  | 4.950524330 |
| H  | 0.511919141  | -3.400266171 | 3.386492968 | C   | 0.363161862  | 4.758226871  | 5.567692757 |
| C  | 2.085127115  | 0.231248975  | 5.946404934 | O   | 1.040948868  | 4.425964355  | 6.574031353 |
| C  | 3.202900887  | -0.088020571 | 6.720482826 | C   | 0.524260938  | 6.141506672  | 4.977503777 |
| N  | 1.979043961  | 1.440320969  | 5.361896992 | H   | -0.450886428 | 6.558030605  | 4.714310646 |
| C  | 4.236083031  | 0.839581609  | 6.837703228 | H   | 1.099346638  | 6.038591385  | 4.050975323 |
| H  | 3.258020163  | -1.051620245 | 7.214357376 | H   | 1.052574754  | 6.798437595  | 5.669438362 |
| C  | 2.975560188  | 2.328631163  | 5.454907894 |     |              |              |             |
| C  | 4.136229038  | 2.062534094  | 6.174903393 |     |              |              |             |
| H  | 5.112289429  | 0.606744647  | 7.436264515 | B6' |              |              |             |
| H  | 2.809319973  | 3.266602039  | 4.940225124 |     |              |              |             |
| H  | 4.925519466  | 2.804507017  | 6.230724335 | C   | -2.272240639 | 1.454467773  | 5.418814659 |
| H  | -3.538465500 | 0.052349206  | 5.858332634 | C   | -2.243474245 | 0.505643129  | 6.606663227 |
| H  | -2.829022884 | 0.001720313  | 4.237252712 | C   | -1.068630576 | -0.478465289 | 6.518434525 |

|    |              |              |             |    |              |              |              |
|----|--------------|--------------|-------------|----|--------------|--------------|--------------|
| O  | -1.007615566 | -1.512508988 | 7.174537182 | H  | -3.595016956 | 2.884835243  | 4.521659374  |
| N  | -0.125509828 | -0.095218465 | 5.599198341 | C  | -2.471387863 | 4.029592991  | 5.958327293  |
| Pd | -0.242527857 | 1.828763127  | 5.135082722 | H  | -3.266288996 | 4.755181789  | 6.172086239  |
| C  | 1.190184712  | -0.743555844 | 5.560227871 | H  | -1.903908253 | 3.877362490  | 6.878948212  |
| H  | 1.302108049  | -1.261946321 | 6.519642353 | C  | -1.567299604 | 4.666236401  | 4.903590202  |
| C  | 1.292768717  | -1.833512783 | 4.413643360 | H  | -2.108855009 | 4.761629581  | 3.950652838  |
| C  | 1.504977703  | -1.190005660 | 3.030312538 | H  | -1.272763014 | 5.671364784  | 5.231154919  |
| H  | 1.517235756  | -1.968710303 | 2.258557081 | O  | -0.353546888 | 3.925405979  | 4.670666218  |
| H  | 0.697494864  | -0.489151418 | 2.806013346 | H  | -0.198340267 | 3.820857763  | 3.658689737  |
| H  | 2.459313631  | -0.648653746 | 2.973604918 | O  | -0.565745115 | 1.288415313  | 3.148246288  |
| C  | 2.465714931  | -2.791226625 | 4.715948105 | C  | -0.335282564 | 2.099553823  | 2.168730736  |
| H  | 2.459802151  | -3.616756678 | 3.995099306 | O  | -0.062599443 | 3.318068266  | 2.265182018  |
| H  | 3.440650463  | -2.296666384 | 4.628728867 | C  | -0.384701550 | 1.446674109  | 0.800981164  |
| H  | 2.383377314  | -3.226464510 | 5.721738338 | H  | -1.158501983 | 0.674908698  | 0.770510018  |
| C  | -0.012656930 | -2.657098293 | 4.391666412 | H  | 0.581782877  | 0.960083723  | 0.620063841  |
| H  | -0.236128032 | -3.076627970 | 5.377501965 | H  | -0.552457511 | 2.201642036  | 0.029109634  |
| H  | -0.860081136 | -2.032670736 | 4.090129375 | O  | -0.124708332 | 2.456278801  | 7.057133198  |
| H  | 0.080199324  | -3.475814342 | 3.669243574 | C  | 0.661292017  | 1.969030619  | 7.997863770  |
| C  | 2.296332598  | 0.296705097  | 5.472599030 | O  | 1.383549571  | 0.987828732  | 7.928098679  |
| C  | 3.604717016  | 0.016383642  | 5.883056164 | C  | 0.557349622  | 2.813735962  | 9.266546249  |
| N  | 1.992089152  | 1.511724710  | 4.977675438 | H  | -0.477870345 | 2.829443216  | 9.620710373  |
| C  | 4.589626789  | 0.986617565  | 5.745748520 | H  | 0.848610163  | 3.846235752  | 9.051859856  |
| H  | 3.828387260  | -0.939512730 | 6.339775562 | H  | 1.206647873  | 2.392342567  | 10.034802437 |
| C  | 2.934270859  | 2.457452774  | 4.857455730 |    |              |              |              |
| C  | 4.257894516  | 2.233860016  | 5.210680485 |    |              |              |              |
| H  | 5.605817318  | 0.779368699  | 6.069087505 |    |              |              |              |
| H  | 2.592148066  | 3.415491581  | 4.475958824 |    |              |              |              |
| H  | 4.997719288  | 3.018365145  | 5.092904091 | C  | -1.995310426 | 1.753706455  | 5.750665665  |
| H  | -2.149943113 | 1.056591272  | 7.547858238 | C  | -2.052937269 | 0.511091948  | 6.628648758  |
| H  | -3.174777269 | -0.073824920 | 6.657781124 | C  | -1.130549431 | -0.616453469 | 6.169442177  |
| H  | -2.451035023 | 0.904810071  | 4.494337082 | O  | -1.245704889 | -1.763274193 | 6.540742397  |
| C  | -3.133313417 | 2.711043358  | 5.502361298 | N  | -0.094045214 | -0.187256992 | 5.287419796  |
| H  | -3.956136942 | 2.489076853  | 6.197929859 | Pd | 0.038812149  | 1.897179246  | 5.276574612  |

=====  
A6-TS  
=====

|   |              |              |             |    |              |              |              |
|---|--------------|--------------|-------------|----|--------------|--------------|--------------|
| C | 1.152251959  | -1.001625180 | 5.319977760 | C  | -1.378005028 | 1.687028766  | 2.525954485  |
| H | 1.032524109  | -1.696202397 | 6.154488087 | H  | -1.826008677 | 0.824817479  | 2.011521339  |
| C | 1.355103612  | -1.872294545 | 4.016698360 | H  | -0.903805196 | 2.327077389  | 1.774134874  |
| C | 1.922901392  | -1.045515537 | 2.847558022 | O  | -0.349297613 | 1.179232359  | 3.373729944  |
| H | 1.969024301  | -1.666926861 | 1.945957303 | H  | -0.440766454 | 0.206103131  | 4.097860336  |
| H | 1.310315013  | -0.168000758 | 2.631945610 | H  | -2.097955704 | 2.694583416  | 6.289108276  |
| H | 2.937765360  | -0.696351707 | 3.063353539 | O  | 0.433480591  | 2.467580557  | 7.177385330  |
| C | 2.336713552  | -3.018725395 | 4.338266373 | C  | 0.800809026  | 1.603223801  | 8.095412254  |
| H | 2.443147898  | -3.669799566 | 3.464117765 | O  | 0.779131770  | 0.379187435  | 7.999604225  |
| H | 3.334417582  | -2.646356344 | 4.586578369 | C  | 1.297803283  | 2.306622982  | 9.352244377  |
| H | 1.977871299  | -3.633183718 | 5.171920300 | H  | 0.660694063  | 3.158547163  | 9.600456238  |
| C | 0.007093234  | -2.503598928 | 3.612179518 | H  | 2.306218147  | 2.688769579  | 9.161624908  |
| H | -0.463240445 | -3.009356260 | 4.459915638 | H  | 1.330535412  | 1.594475627  | 10.178286552 |
| H | -0.697024345 | -1.756809950 | 3.231712341 | O  | -0.269943297 | 3.908581257  | 5.007918358  |
| H | 0.166910574  | -3.233512163 | 2.811371803 | C  | 0.694505751  | 4.593015194  | 4.440998554  |
| C | 2.346260786  | -0.113014691 | 5.620234489 | O  | 1.750398636  | 4.131714821  | 4.017255783  |
| C | 3.472445726  | -0.617415488 | 6.276993275 | C  | 0.368856549  | 6.079960346  | 4.360596180  |
| N | 2.295015097  | 1.168549538  | 5.214818954 | H  | 0.349840969  | 6.500616074  | 5.371343613  |
| C | 4.571331501  | 0.212377504  | 6.475155830 | H  | -0.621717095 | 6.231977940  | 3.922607660  |
| H | 3.468043804  | -1.635354877 | 6.648561001 | H  | 1.128259182  | 6.589087963  | 3.764800072  |
| C | 3.351392746  | 1.973170638  | 5.406442165 |    |              |              |              |
| C | 4.519531250  | 1.529262543  | 6.018439293 |    |              |              |              |
| H | 5.452130795  | -0.161906525 | 6.989293575 |    |              |              |              |
| H | 3.216854811  | 2.989833117  | 5.053913116 |    |              |              |              |
| H | 5.355358124  | 2.208389997  | 6.149652004 | C  | -2.003298044 | 1.733590007  | 5.658583641  |
| H | -1.725425243 | 0.731247425  | 7.647983551 | C  | -2.082743168 | 0.537379503  | 6.603325844  |
| H | -3.074944019 | 0.116973221  | 6.687103748 | C  | -1.132419348 | -0.605732203 | 6.287368298  |
| C | -2.895180941 | 1.657656908  | 4.525076389 | O  | -1.217699528 | -1.718702674 | 6.729433060  |
| H | -3.883906364 | 2.003676891  | 4.860296249 | N  | -0.067795075 | -0.231654331 | 5.328826904  |
| H | -3.022940397 | 0.602572918  | 4.245244026 | Pd | 0.017698042  | 1.873292089  | 5.180344105  |
| C | -2.461628199 | 2.454317093  | 3.288825035 | C  | 1.187108397  | -1.046050310 | 5.409080505  |
| H | -3.314557076 | 2.610436201  | 2.617849588 | H  | 1.057275772  | -1.705595374 | 6.268937588  |
| H | -2.083692551 | 3.434230328  | 3.591425896 | C  | 1.379370332  | -1.948555589 | 4.136713028  |

|   |              |              |             |    |              |              |              |
|---|--------------|--------------|-------------|----|--------------|--------------|--------------|
| C | 1.741281748  | -1.111371160 | 2.895477057 | O  | -0.411910772 | 1.372675180  | 3.297996759  |
| H | 1.776550531  | -1.760641098 | 2.013725758 | H  | -0.468513906 | -0.279834867 | 4.379312992  |
| H | 1.020103097  | -0.310499549 | 2.707242966 | H  | -2.121820688 | 2.691059113  | 6.165179253  |
| H | 2.723052740  | -0.642273486 | 3.007597208 | O  | 0.510912180  | 2.437598705  | 7.108030319  |
| C | 2.506985426  | -2.963103771 | 4.415449619 | C  | 0.812105238  | 1.570464373  | 8.029578209  |
| H | 2.613593340  | -3.637798786 | 3.559735298 | O  | 0.623475432  | 0.350105375  | 7.971038342  |
| H | 3.470988512  | -2.470277309 | 4.566015720 | C  | 1.459309936  | 2.210163832  | 9.251514435  |
| H | 2.289839506  | -3.575375557 | 5.298816204 | H  | 0.848811567  | 3.043146372  | 9.611198425  |
| C | 0.080760323  | -2.743698359 | 3.879588842 | H  | 2.433451891  | 2.618214846  | 8.964273453  |
| H | -0.259439796 | -3.256942987 | 4.783556938 | H  | 1.587067246  | 1.465916634  | 10.038647652 |
| H | -0.738032997 | -2.106566191 | 3.526029110 | O  | -0.308241785 | 3.859951496  | 4.928243160  |
| H | 0.254844755  | -3.489200592 | 3.097326756 | C  | 0.688645065  | 4.570507050  | 4.455729961  |
| C | 2.369470835  | -0.136092395 | 5.684048176 | O  | 1.769475460  | 4.131087303  | 4.079079151  |
| C | 3.465821266  | -0.594228566 | 6.419640541 | C  | 0.366747051  | 6.059205055  | 4.437094212  |
| N | 2.329123497  | 1.108847618  | 5.181966782 | H  | 0.474637181  | 6.454195976  | 5.452873230  |
| C | 4.556160450  | 0.250821829  | 6.603229046 | H  | -0.663416088 | 6.234983444  | 4.118486881  |
| H | 3.447472334  | -1.587321520 | 6.854370594 | H  | 1.065936804  | 6.574484825  | 3.776837111  |
| C | 3.376320124  | 1.927985072  | 5.363536358 |    |              |              |              |
| C | 4.518718243  | 1.532675505  | 6.054747105 |    |              |              |              |
| H | 5.416659832  | -0.083173610 | 7.176235676 |    |              |              |              |
| H | 3.252838373  | 2.921575069  | 4.947531700 |    |              |              |              |
| H | 5.346424580  | 2.223972082  | 6.175170898 | C  | -2.340305567 | 1.348458767  | 5.317164898  |
| H | -1.817813873 | 0.829068720  | 7.622876644 | C  | -2.290280104 | -0.146181583 | 5.388811111  |
| H | -3.099176645 | 0.125537053  | 6.631376266 | C  | -0.973711014 | -0.703738153 | 5.943057060  |
| C | -2.870291233 | 1.614654064  | 4.418304443 | O  | -0.895380318 | -1.369969249 | 6.947628975  |
| H | -3.903799295 | 1.769015670  | 4.767639160 | N  | 0.165532663  | -0.337191522 | 5.167659760  |
| H | -2.829074860 | 0.592023849  | 4.021880627 | Pd | 0.169411793  | 1.892289639  | 5.303278923  |
| C | -2.549407005 | 2.626377583  | 3.313450098 | C  | 1.434020758  | -1.080704331 | 5.406471729  |
| H | -3.383454561 | 2.682637691  | 2.604788065 | H  | 1.332446337  | -1.526552200 | 6.398359299  |
| H | -2.430223942 | 3.615048409  | 3.764827967 | C  | 1.600737929  | -2.252139091 | 4.372354031  |
| C | -1.247769475 | 2.233288765  | 2.565388918 | C  | 1.790992260  | -1.723391771 | 2.937767267  |
| H | -1.507869244 | 1.670562267  | 1.654581547 | H  | 1.886886597  | -2.566583157 | 2.245053053  |
| H | -0.708724916 | 3.138456106  | 2.251086950 | H  | 0.943200052  | -1.118222952 | 2.595396280  |

=====  
A7-TS  
=====



|   |              |              |             |    |              |              |              |
|---|--------------|--------------|-------------|----|--------------|--------------|--------------|
| H | 2.685639620  | -1.103106618 | 2.851083755 | O  | 1.156883717  | 1.948812127  | 7.066642761  |
| C | 2.831774950  | -3.091442347 | 4.770133495 | C  | 0.369044095  | 1.809748888  | 8.098751068  |
| H | 2.922643423  | -3.956716299 | 4.105384827 | O  | -0.857961595 | 1.669922829  | 8.054452896  |
| H | 3.757805824  | -2.515359640 | 4.697599411 | C  | 1.125179887  | 1.838995218  | 9.418681145  |
| H | 2.743061543  | -3.468090534 | 5.795874119 | H  | 1.450142622  | 2.864558220  | 9.622675896  |
| C | 0.356747091  | -3.162407875 | 4.425655365 | H  | 2.021668673  | 1.216655612  | 9.354005814  |
| H | 0.149969980  | -3.498614788 | 5.446154594 | H  | 0.477921963  | 1.495635629  | 10.226613045 |
| H | -0.539485276 | -2.655048609 | 4.051615715 | O  | -0.032202262 | 3.911193371  | 5.379256248  |
| H | 0.510473371  | -4.043806076 | 3.794773102 | C  | 0.740564585  | 4.564840794  | 4.545978069  |
| C | 2.604966402  | -0.114842154 | 5.415998459 | O  | 1.464103818  | 4.060463905  | 3.688109636  |
| C | 3.699116230  | -0.306665480 | 6.261374474 | C  | 0.662408471  | 6.073802948  | 4.744875908  |
| N | 2.514740705  | 0.923491240  | 4.576952457 | H  | 1.180289268  | 6.338318348  | 5.672589779  |
| C | 4.741527557  | 0.617491663  | 6.218870163 | H  | -0.376224279 | 6.399799347  | 4.844866753  |
| H | 3.728618622  | -1.155382156 | 6.937580109 | H  | 1.142194748  | 6.580231190  | 3.905877590  |
| C | 3.506185293  | 1.823529601  | 4.555791855 |    |              |              |              |
| C | 4.644735813  | 1.705740929  | 5.352827549 |    |              |              |              |
| H | 5.606891155  | 0.497793317  | 6.864958763 | A8 |              |              |              |
| H | 3.345690966  | 2.675855637  | 3.902729273 |    |              |              |              |
| H | 5.425705910  | 2.457991123  | 5.304360867 | C  | -2.450061083 | 1.524518847  | 4.256477833  |
| H | -3.063148260 | -0.474668324 | 6.096073627 | C  | -2.290323973 | 0.106994085  | 3.700260639  |
| H | -2.500846148 | -0.583820999 | 4.407246590 | C  | -1.171807170 | -0.602575064 | 4.460147858  |
| C | -3.351322651 | 2.065809727  | 4.494914055 | O  | -1.327304244 | -0.998684764 | 5.605005741  |
| H | -4.100543022 | 2.476241112  | 5.188184261 | N  | 0.026678182  | -0.687787890 | 3.784920931  |
| H | -3.853742123 | 1.383310795  | 3.799547911 | Pd | 0.234910324  | 1.949391484  | 5.794970036  |
| C | -2.680699110 | 3.226228714  | 3.736930847 | C  | 1.304860115  | -0.813359082 | 4.513366699  |
| H | -3.409472942 | 3.771929741  | 3.128543615 | H  | 1.080348372  | -0.591124773 | 5.563376427  |
| H | -2.230509758 | 3.920340300  | 4.451608658 | C  | 1.875802517  | -2.270084381 | 4.504888535  |
| C | -1.579634428 | 2.565206528  | 2.901648521 | C  | 1.987242460  | -2.880670071 | 3.092854977  |
| H | -2.016229153 | 2.109035492  | 1.999670386 | H  | 2.220168114  | -3.947926283 | 3.169986963  |
| H | -0.818427801 | 3.294510126  | 2.597060442 | H  | 1.036350608  | -2.785255194 | 2.559137106  |
| O | -0.974321425 | 1.534590602  | 3.651282787 | H  | 2.768746614  | -2.432964802 | 2.473394394  |
| H | -0.056689292 | -0.245235920 | 4.175175190 | C  | 3.227651119  | -2.303281307 | 5.248476505  |
| H | -2.010679722 | 1.846936822  | 6.231816292 | H  | 3.560496569  | -3.339196920 | 5.373747826  |

|   |              |              |             |        |              |              |             |
|---|--------------|--------------|-------------|--------|--------------|--------------|-------------|
| H | 4.021414757  | -1.763860106 | 4.726115704 | C      | 3.313468218  | 1.689278722  | 8.711894035 |
| H | 3.128763199  | -1.862883925 | 6.247586250 | H      | 3.726392984  | 0.706097603  | 8.463576317 |
| C | 0.881338418  | -3.145988464 | 5.302234650 | H      | 2.690922022  | 1.566054463  | 9.602393150 |
| H | 0.727008879  | -2.758611679 | 6.312954426 | H      | 4.124084473  | 2.391006947  | 8.913028717 |
| H | -0.097297840 | -3.183132887 | 4.819032669 | O      | -1.234960556 | 2.309367418  | 7.131985664 |
| H | 1.268521190  | -4.168339252 | 5.374785900 | C      | -1.640485048 | 3.550902843  | 7.194442749 |
| C | 2.182271719  | 0.344214618  | 4.028465748 | O      | -1.301565051 | 4.458050728  | 6.428940296 |
| C | 3.255057812  | 0.223520890  | 3.141950607 | C      | -2.608959675 | 3.793277264  | 8.344106674 |
| N | 1.822477221  | 1.576560259  | 4.467783451 | H      | -2.053018332 | 3.765928745  | 9.286876678 |
| C | 3.962260485  | 1.351812601  | 2.732210159 | H      | -3.361358881 | 3.001166344  | 8.386982918 |
| H | 3.543151617  | -0.750359833 | 2.777899027 | H      | -3.083670855 | 4.769397259  | 8.232733727 |
| C | 2.509290934  | 2.669708490  | 4.089750290 |        |              |              |             |
| C | 3.587238550  | 2.600042105  | 3.215097666 | =====  |              |              |             |
| H | 4.798877716  | 1.248702645  | 2.047192335 | A6-TS' |              |              |             |
| H | 2.196567059  | 3.602504730  | 4.540441036 | =====  |              |              |             |
| H | 4.116681576  | 3.504966021  | 2.938699245 | C      | -2.003526926 | 1.713183522  | 5.655016899 |
| H | -3.221359491 | -0.441091031 | 3.872028828 | C      | -2.134063005 | 0.526210010  | 6.607536316 |
| H | -2.103620052 | 0.151573539  | 2.620787382 | C      | -1.098252177 | -0.569312871 | 6.317789555 |
| C | -3.464580059 | 2.410155296  | 3.530004978 | O      | -1.190955162 | -1.710390687 | 6.752776623 |
| H | -4.464358807 | 2.306356192  | 3.959984541 | N      | -0.082981683 | -0.144973993 | 5.496855736 |
| H | -3.520077229 | 2.137232304  | 2.468631744 | Pd     | 0.066592343  | 1.822193384  | 5.374264717 |
| C | -2.873306274 | 3.818202257  | 3.697213411 | C      | 1.151609659  | -0.936215937 | 5.407641411 |
| H | -3.248879433 | 4.532482624  | 2.959224463 | H      | 1.132054210  | -1.617628932 | 6.264158726 |
| H | -3.062828302 | 4.209683418  | 4.699772835 | C      | 1.236570358  | -1.829564214 | 4.102453709 |
| C | -1.377682447 | 3.564579964  | 3.549021959 | C      | 1.728655577  | -1.022962570 | 2.884922743 |
| H | -1.057963133 | 3.535287857  | 2.499224186 | H      | 1.586949348  | -1.607158899 | 1.968153358 |
| H | -0.771187723 | 4.261515617  | 4.125319481 | H      | 1.180854201  | -0.084360585 | 2.784593344 |
| O | -1.166295886 | 2.228309631  | 4.104207516 | H      | 2.794326305  | -0.778726280 | 2.964510679 |
| H | 0.070190884  | -0.188390210 | 2.907859564 | C      | 2.198818207  | -3.004736662 | 4.361660480 |
| H | -2.654033184 | 1.474182725  | 5.330368042 | H      | 2.169840336  | -3.700515747 | 3.515800238 |
| O | 1.451771855  | 1.405537486  | 7.304455757 | H      | 3.236149549  | -2.674479008 | 4.479427338 |
| C | 2.466691494  | 2.200256586  | 7.550251007 | H      | 1.910580158  | -3.566109896 | 5.258057594 |
| O | 2.746471405  | 3.228737593  | 6.938714504 | C      | -0.160167277 | -2.411134243 | 3.805748701 |

|   |              |              |             |     |              |              |              |
|---|--------------|--------------|-------------|-----|--------------|--------------|--------------|
| H | -0.548421681 | -2.968259096 | 4.662376404 | H   | 1.285820723  | 1.517440319  | 10.336924553 |
| H | -0.873657107 | -1.617779016 | 3.570030689 | O   | 0.135564834  | 3.975627661  | 5.296300411  |
| H | -0.101956494 | -3.085038185 | 2.943199396 | C   | 0.518226087  | 4.614267349  | 4.272816658  |
| C | 2.375103235  | -0.053415742 | 5.557818413 | O   | 0.783619463  | 4.085479736  | 3.141154528  |
| C | 3.601527452  | -0.574514806 | 5.984123707 | C   | 0.696613610  | 6.108173370  | 4.404383183  |
| N | 2.263777256  | 1.250204682  | 5.241600990 | H   | 1.730509281  | 6.307761669  | 4.708267212  |
| C | 4.716724873  | 0.253315002  | 6.032886028 | H   | 0.032334436  | 6.501501083  | 5.175508022  |
| H | 3.661886215  | -1.608670115 | 6.302704334 | H   | 0.521671116  | 6.598427773  | 3.445125103  |
| C | 3.332378149  | 2.056247950  | 5.301438332 |     |              |              |              |
| C | 4.590701103  | 1.597744703  | 5.670884132 |     |              |              |              |
| H | 5.674235821  | -0.141223714 | 6.362443924 | A7' |              |              |              |
| H | 3.155267715  | 3.096791267  | 5.043323040 |     |              |              |              |
| H | 5.437306881  | 2.276259422  | 5.695774078 | C   | -1.992259741 | 1.713868260  | 5.647250652  |
| H | -1.983775616 | 0.838432372  | 7.644084454 | C   | -2.115458012 | 0.544905841  | 6.620986462  |
| H | -3.130857944 | 0.072772868  | 6.542361259 | C   | -1.091968417 | -0.559167266 | 6.326161861  |
| C | -2.796840906 | 1.518063307  | 4.374282837 | O   | -1.189737797 | -1.699372172 | 6.762456894  |
| H | -3.827992678 | 1.817780375  | 4.619816780 | N   | -0.076269984 | -0.143678203 | 5.498857975  |
| H | -2.837401867 | 0.446635962  | 4.139365196 | Pd  | 0.079122394  | 1.822122931  | 5.357459068  |
| C | -2.342610598 | 2.269831419  | 3.116026163 | C   | 1.154086590  | -0.944283307 | 5.407551765  |
| H | -3.144654036 | 2.233303547  | 2.368170261 | H   | 1.123920321  | -1.631709218 | 6.259897709  |
| H | -2.146209240 | 3.327298164  | 3.333079576 | C   | 1.218991995  | -1.824742079 | 4.090476513  |
| C | -1.094769239 | 1.632140279  | 2.505280018 | C   | 1.712211967  | -1.005560994 | 2.884927750  |
| H | -1.251881003 | 0.554769576  | 2.368309259 | H   | 1.598620653  | -1.589124799 | 1.964087009  |
| H | -0.897742033 | 2.068346500  | 1.515156746 | H   | 1.153976440  | -0.072764620 | 2.784420252  |
| O | 0.076723509  | 1.818400979  | 3.282046080 | H   | 2.772478342  | -0.746274590 | 2.983872175  |
| H | 0.495837897  | 2.906664610  | 3.161792755 | C   | 2.169407606  | -3.018239975 | 4.317738056  |
| H | -2.161803961 | 2.687860012  | 6.120895863 | H   | 2.140071869  | -3.685401440 | 3.449093103  |
| O | 0.125184298  | 2.176189661  | 7.365038395 | H   | 3.209307909  | -2.702762604 | 4.442494869  |
| C | 0.768684864  | 1.446220636  | 8.253628731 | H   | 1.875164390  | -3.603044033 | 5.197037697  |
| O | 1.381157875  | 0.407528341  | 8.056900024 | C   | -0.185800403 | -2.387145042 | 3.797679901  |
| C | 0.653915524  | 2.071543694  | 9.641538620 | H   | -0.589207768 | -2.914365530 | 4.665954590  |
| H | -0.386454374 | 2.029989719  | 9.979168892 | H   | -0.883406341 | -1.585646868 | 3.541621685  |
| H | 0.952236891  | 3.123183489  | 9.610254288 | H   | -0.137374505 | -3.080976963 | 2.950998306  |

|   |              |              |              |    |              |              |             |
|---|--------------|--------------|--------------|----|--------------|--------------|-------------|
| C | 2.384114265  | -0.068755023 | 5.574522495  | O  | 0.666781306  | 4.163151741  | 3.097060919 |
| C | 3.602894783  | -0.598142326 | 6.015437126  | C  | 0.670539796  | 6.158576488  | 4.387997150 |
| N | 2.284779310  | 1.238973260  | 5.270833492  | H  | 1.744659305  | 6.363767624  | 4.457123756 |
| C | 4.718114376  | 0.225514978  | 6.099957943  | H  | 0.182792470  | 6.533411503  | 5.287952900 |
| H | 3.656441450  | -1.635973930 | 6.319694042  | H  | 0.290541738  | 6.660714626  | 3.495864868 |
| C | 3.353662252  | 2.040113449  | 5.367941380  |    |              |              |             |
| C | 4.602005005  | 1.574957132  | 5.758343697  |    |              |              |             |
| H | 5.666959763  | -0.175702557 | 6.444563389  |    |              |              |             |
| H | 3.182900190  | 3.085464716  | 5.126049995  |    |              |              |             |
| H | 5.447906971  | 2.251657248  | 5.814907074  | C  | -2.629647732 | 1.182486534  | 5.241883755 |
| H | -1.944304585 | 0.872569323  | 7.648861885  | C  | -2.401315689 | 0.188402817  | 6.330795288 |
| H | -3.115997076 | 0.097727828  | 6.578953743  | C  | -1.209463000 | -0.733388603 | 5.978951454 |
| C | -2.788266420 | 1.488158226  | 4.373768806  | O  | -1.224135876 | -1.934141517 | 6.222540379 |
| H | -3.820588589 | 1.787131667  | 4.613173962  | N  | -0.188993841 | -0.072341874 | 5.346312523 |
| H | -2.822096348 | 0.411542743  | 4.162856579  | Pd | -0.231253490 | 1.940008998  | 5.514327049 |
| C | -2.340754986 | 2.208801746  | 3.096290827  | C  | 1.088547707  | -0.804578900 | 5.223116875 |
| H | -3.136838913 | 2.132324934  | 2.345273495  | H  | 1.029765248  | -1.611876130 | 5.960898876 |
| H | -2.171153307 | 3.276990891  | 3.281659126  | C  | 1.324355841  | -1.511904836 | 3.825253725 |
| C | -1.070786595 | 1.583861470  | 2.518588781  | C  | 1.884907246  | -0.542538822 | 2.766933918 |
| H | -1.206427932 | 0.498881936  | 2.407676697  | H  | 1.874043107  | -1.020952344 | 1.780935884 |
| H | -0.880736053 | 1.992802262  | 1.514523387  | H  | 1.304569483  | 0.380329460  | 2.711698294 |
| O | 0.088733293  | 1.833477736  | 3.289569616  | H  | 2.918450832  | -0.257972836 | 2.986693859 |
| H | 0.447418600  | 3.060285091  | 3.127552271  | C  | 2.340475321  | -2.655444145 | 4.031182766 |
| H | -2.153643370 | 2.695964575  | 6.095254898  | H  | 2.524473667  | -3.170344114 | 3.081565380 |
| O | 0.150342643  | 2.181842566  | 7.353515625  | H  | 3.304812193  | -2.286015034 | 4.394706249 |
| C | 0.771596432  | 1.439447284  | 8.244832993  | H  | 1.964274526  | -3.396836758 | 4.745469093 |
| O | 1.336826324  | 0.372019470  | 8.055827141  | C  | 0.007426529  | -2.130862474 | 3.322760820 |
| C | 0.681460917  | 2.073305607  | 9.631268501  | H  | -0.434109181 | -2.782720089 | 4.079296589 |
| H | -0.342662573 | 1.973462343  | 10.005747795 | H  | -0.725102127 | -1.357893109 | 3.078823090 |
| H | 0.914862692  | 3.139853716  | 9.584758759  | H  | 0.195481673  | -2.714242935 | 2.414215565 |
| H | 1.364654779  | 1.558676958  | 10.308049202 | C  | 2.275541306  | 0.064491674  | 5.596061230 |
| O | 0.172330722  | 4.004478931  | 5.289094925  | C  | 3.322321653  | -0.455732554 | 6.365891933 |
| C | 0.476247787  | 4.668419361  | 4.266547680  | N  | 2.301332474  | 1.328083396  | 5.136943817 |

=====

A7'-TS

=====

|   |              |              |              |       |              |              |             |
|---|--------------|--------------|--------------|-------|--------------|--------------|-------------|
| C | 4.432487488  | 0.342163205  | 6.637560368  | H     | -0.059727225 | 6.609215260  | 5.532378197 |
| H | 3.258235931  | -1.469340563 | 6.747472286  | H     | 1.707431674  | 6.492159843  | 5.789516926 |
| C | 3.359400272  | 2.094877005  | 5.417862892  |       |              |              |             |
| C | 4.456940174  | 1.649157166  | 6.153781891  |       |              |              |             |
| H | 5.257383823  | -0.047406252 | 7.228024006  | B6-TS |              |              |             |
| H | 3.323207855  | 3.113629341  | 5.038709641  |       |              |              |             |
| H | 5.296429157  | 2.309854984  | 6.345225334  | C     | -2.350430727 | 1.862686753  | 5.416160583 |
| H | -2.196379900 | 0.636955500  | 7.303908348  | C     | -2.633189440 | 0.363277406  | 5.521720409 |
| H | -3.284657001 | -0.461670190 | 6.409979820  | C     | -1.494198680 | -0.543751001 | 5.952641964 |
| C | -3.092421055 | 0.590641320  | 3.948015451  | O     | -1.640533328 | -1.679018617 | 6.351966381 |
| H | -4.191666126 | 0.574189961  | 4.058351517  | N     | -0.216769904 | 0.077626429  | 5.856378555 |
| H | -2.769969225 | -0.454421490 | 3.901868820  | Pd    | -0.256606102 | 2.076916218  | 5.235819340 |
| C | -2.735385656 | 1.304896712  | 2.635508776  | C     | 1.002090096  | -0.762315929 | 5.727170944 |
| H | -2.997790337 | 0.664461911  | 1.785148740  | H     | 0.897036791  | -1.560247898 | 6.470293999 |
| H | -3.295338869 | 2.242540121  | 2.546920061  | C     | 1.234419942  | -1.470355511 | 4.325016975 |
| C | -1.242353916 | 1.633602858  | 2.661842346  | C     | 1.934642196  | -0.548894405 | 3.305127144 |
| H | -0.645495176 | 0.714056492  | 2.664665937  | H     | 1.980100989  | -1.058787942 | 2.336244822 |
| H | -0.967923403 | 2.194502354  | 1.752410889  | H     | 1.409542918  | 0.397083640  | 3.174200535 |
| O | -0.992766321 | 2.455392122  | 3.752755642  | H     | 2.962034225  | -0.319285482 | 3.603247643 |
| H | 1.303932309  | 3.224509001  | 7.315206051  | C     | 2.145033360  | -2.689265728 | 4.584807873 |
| H | -2.937383413 | 2.197583199  | 5.474693298  | H     | 2.350852251  | -3.206634998 | 3.641848087 |
| O | 0.680223286  | 1.910678148  | 7.405344486  | H     | 3.109223843  | -2.394340277 | 5.011392117 |
| C | 0.585281134  | 1.075751185  | 8.429047585  | H     | 1.670544028  | -3.407166243 | 5.263717175 |
| O | -0.330758244 | 0.290097624  | 8.601439476  | C     | -0.087189078 | -1.972511888 | 3.716967344 |
| C | 1.765001059  | 1.191934586  | 9.382842064  | H     | -0.606781840 | -2.659938097 | 4.387119770 |
| H | 1.890841246  | 2.229551315  | 9.709222794  | H     | -0.759376347 | -1.148129582 | 3.464833021 |
| H | 2.678169727  | 0.900965214  | 8.855362892  | H     | 0.130994111  | -2.506000519 | 2.785321236 |
| H | 1.610755324  | 0.545824111  | 10.247584343 | C     | 2.179809332  | 0.124006063  | 6.087519169 |
| O | -0.261454672 | 4.108260155  | 5.754958153  | C     | 3.275892496  | -0.351794451 | 6.807238102 |
| C | 0.621536434  | 4.750179291  | 6.353231907  | N     | 2.130453587  | 1.387473345  | 5.624080181 |
| O | 1.530113697  | 4.225027084  | 7.130986691  | C     | 4.363324165  | 0.496022552  | 7.017458439 |
| C | 0.722109854  | 6.243998051  | 6.196786404  | H     | 3.272746086  | -1.366312027 | 7.191737175 |
| H | 0.646202981  | 6.720849514  | 7.178349495  | C     | 3.168506145  | 2.204758883  | 5.831969738 |

|   |              |             |             |       |              |              |             |
|---|--------------|-------------|-------------|-------|--------------|--------------|-------------|
| C | 4.315184593  | 1.793129563 | 6.512919426 | ===== |              |              |             |
| H | 5.231217384  | 0.146833271 | 7.569937706 | B7    |              |              |             |
| H | 3.046346188  | 3.207676411 | 5.437695980 | ===== |              |              |             |
| H | 5.140681744  | 2.483875513 | 6.651154041 | C     | -2.359063148 | 1.893539429  | 5.524950504 |
| H | -3.487260103 | 0.163774893 | 6.178376198 | C     | -2.644064188 | 0.430946469  | 5.859982014 |
| H | -2.876219511 | 0.011572827 | 4.513971329 | C     | -1.549705863 | -0.590525925 | 5.596333504 |
| H | -2.626191139 | 2.262334347 | 4.444182873 | O     | -1.731233716 | -1.770971060 | 5.463703156 |
| C | -2.855540752 | 2.715786219 | 6.557288170 | N     | -0.215327337 | -0.008259121 | 5.710235119 |
| H | -3.953677654 | 2.628454924 | 6.511075497 | Pd    | -0.274936020 | 2.082752228  | 5.276018620 |
| H | -2.615718842 | 3.765013695 | 6.359935760 | C     | 1.024040699  | -0.852984965 | 5.521387577 |
| C | -2.384069920 | 2.318164587 | 7.963039875 | H     | 0.865802348  | -1.739779830 | 6.145720005 |
| H | -2.974029541 | 2.858373880 | 8.713062286 | C     | 1.408965945  | -1.387033820 | 4.084675789 |
| H | -2.552910805 | 1.248033166 | 8.143169403 | C     | 1.994619370  | -0.292918056 | 3.168680191 |
| C | -0.909296513 | 2.647615433 | 8.183050156 | H     | 2.145102262  | -0.714377463 | 2.168548107 |
| H | -0.743395925 | 3.725652695 | 8.059317589 | H     | 1.345797181  | 0.576916218  | 3.083458185 |
| H | -0.604252696 | 2.370852709 | 9.201730728 | H     | 2.966329098  | 0.059335846  | 3.525334597 |
| O | -0.032463264 | 1.973652959 | 7.294264793 | C     | 2.506012440  | -2.456581116 | 4.311582088 |
| H | -0.158700481 | 0.781542897 | 6.906581879 | H     | 2.805799961  | -2.874432325 | 3.345292568 |
| O | -0.146226510 | 2.074250460 | 3.222419024 | H     | 3.402956247  | -2.041671991 | 4.780584812 |
| C | -0.952790260 | 1.472844481 | 2.384582520 | H     | 2.141981602  | -3.285182476 | 4.930972099 |
| O | -1.945856690 | 0.805850387 | 2.664734125 | C     | 0.235625699  | -2.085224152 | 3.371746778 |
| C | -0.488700807 | 1.660002708 | 0.945440233 | H     | -0.170155451 | -2.900745153 | 3.973577738 |
| H | 0.419778317  | 1.068726301 | 0.790375113 | H     | -0.577653289 | -1.398990989 | 3.138691664 |
| H | -0.237227276 | 2.705854654 | 0.754825592 | H     | 0.603875339  | -2.506201506 | 2.428906441 |
| H | -1.268162131 | 1.318440676 | 0.263257563 | C     | 2.143018246  | -0.000967022 | 6.102022171 |
| O | -0.593928993 | 4.079476357 | 5.104438782 | C     | 3.118151188  | -0.522531569 | 6.952069283 |
| C | 0.421394289  | 4.825230122 | 4.729782581 | N     | 2.141193867  | 1.288661599  | 5.722744465 |
| O | 1.566459894  | 4.431775093 | 4.543202400 | C     | 4.140880108  | 0.317767620  | 7.392975330 |
| C | 0.017212097  | 6.280891418 | 4.535055161 | H     | 3.076455355  | -1.563957334 | 7.254367352 |
| H | -0.526916623 | 6.646389961 | 5.410475731 | C     | 3.116565228  | 2.095971584  | 6.150791645 |
| H | -0.652933300 | 6.358051777 | 3.673042536 | C     | 4.146627426  | 1.647502780  | 6.979259968 |
| H | 0.907449961  | 6.887372017 | 4.362952709 | H     | 4.916510105  | -0.062250905 | 8.052008629 |
|   |              |             |             | H     | 3.041829586  | 3.123425484  | 5.811354637 |

|       |              |             |             |    |              |              |             |
|-------|--------------|-------------|-------------|----|--------------|--------------|-------------|
| H     | 4.924361706  | 2.333846092 | 7.298436165 | C  | -2.495129824 | 1.537709117  | 6.022094250 |
| H     | -2.894485474 | 0.319433033 | 6.922387600 | C  | -2.475475550 | 0.142717540  | 6.571902275 |
| H     | -3.508051395 | 0.091764227 | 5.281999588 | C  | -1.340334892 | -0.755996883 | 6.059984207 |
| H     | -2.641595125 | 2.130021811 | 4.503919601 | O  | -1.500615835 | -1.942925096 | 5.882402420 |
| C     | -2.874444485 | 2.911640167 | 6.518133640 | N  | -0.093329683 | -0.095194489 | 5.862343311 |
| H     | -3.967856884 | 2.765378475 | 6.540647984 | Pd | -0.213476315 | 2.144819736  | 5.121251106 |
| H     | -2.699059963 | 3.913437128 | 6.118251801 | C  | 1.116200805  | -0.938762307 | 5.617834091 |
| C     | -2.328644276 | 2.821677685 | 7.951228619 | H  | 1.008647680  | -1.829729438 | 6.246973038 |
| H     | -2.833987236 | 3.571220160 | 8.573091507 | C  | 1.351521850  | -1.449708462 | 4.130642414 |
| H     | -2.552029371 | 1.842599988 | 8.394639015 | C  | 2.220788240  | -0.474799752 | 3.307559013 |
| C     | -0.814411223 | 3.049517393 | 8.000218391 | H  | 2.339383602  | -0.878292680 | 2.295407534 |
| H     | -0.581188202 | 4.064434052 | 7.644437313 | H  | 1.770081520  | 0.514596879  | 3.231297493 |
| H     | -0.468626112 | 2.977747679 | 9.043572426 | H  | 3.223437548  | -0.365504116 | 3.732293129 |
| O     | -0.093204275 | 2.085918665 | 7.278419971 | C  | 2.108363628  | -2.790377140 | 4.245768070 |
| H     | -0.181670099 | 0.325896144 | 6.696766376 | H  | 2.310326338  | -3.190317869 | 3.246697426 |
| O     | -0.323448867 | 2.070064545 | 3.224555731 | H  | 3.074436903  | -2.670003176 | 4.748140335 |
| C     | -1.102117777 | 1.260589242 | 2.564043283 | H  | 1.522429109  | -3.536411762 | 4.794616699 |
| O     | -1.876623392 | 0.433943063 | 3.059050560 | C  | 0.032959763  | -1.702316880 | 3.375856400 |
| C     | -0.945621908 | 1.400430441 | 1.057056189 | H  | -0.543175638 | -2.507992506 | 3.831789494 |
| H     | 0.044982649  | 1.032797694 | 0.769965589 | H  | -0.600142360 | -0.813463688 | 3.331662178 |
| H     | -1.001942158 | 2.452237368 | 0.764785945 | H  | 0.267296880  | -1.991253853 | 2.345178843 |
| H     | -1.714298129 | 0.818235397 | 0.547374785 | C  | 2.295596123  | -0.113263667 | 6.110670567 |
| O     | -0.560334682 | 4.077784061 | 5.135666847 | C  | 3.421684027  | -0.693842888 | 6.698422909 |
| C     | 0.509410560  | 4.757473469 | 4.782209396 | N  | 2.202379465  | 1.206882000  | 5.891832352 |
| O     | 1.632804990  | 4.288756847 | 4.643684864 | C  | 4.498410225  | 0.130466357  | 7.028573513 |
| C     | 0.200759023  | 6.225615501 | 4.527922153 | H  | 3.453270197  | -1.762826800 | 6.885307312 |
| H     | -0.581698000 | 6.590027332 | 5.197021008 | C  | 3.228991747  | 1.998651743  | 6.217844009 |
| H     | -0.155042902 | 6.332395077 | 3.497440100 | C  | 4.407057762  | 1.499538302  | 6.778241634 |
| H     | 1.113030553  | 6.813016891 | 4.645432949 | H  | 5.393650532  | -0.292211622 | 7.477094650 |
|       |              |             |             | H  | 3.076712370  | 3.054288387  | 6.009272099 |
|       |              |             |             | H  | 5.225429058  | 2.170877695  | 7.019309044 |
| B7-TS |              |             |             | H  | -2.447088480 | 0.141389847  | 7.666501999 |
|       |              |             |             | H  | -3.399851561 | -0.360214591 | 6.259396076 |

|   |              |             |             |    |              |              |             |
|---|--------------|-------------|-------------|----|--------------|--------------|-------------|
| H | -2.435674906 | 1.563938856 | 4.928394318 | O  | -1.833298683 | -2.191137552 | 6.610671997 |
| C | -3.328781605 | 2.626964331 | 6.618707657 | N  | -0.212739259 | -0.563583553 | 6.534565926 |
| H | -4.365313053 | 2.260200024 | 6.665346622 | Pd | 0.235345542  | 2.265303850  | 5.019360542 |
| H | -3.307420731 | 3.482360840 | 5.935625076 | C  | 0.869496942  | -1.191158414 | 5.785817623 |
| C | -2.811955214 | 3.041551590 | 7.997155666 | H  | 1.182072759  | -2.091739655 | 6.327002525 |
| H | -3.302336693 | 3.953860521 | 8.350811005 | C  | 0.512967885  | -1.683070064 | 4.303904533 |
| H | -3.000100851 | 2.252284288 | 8.734720230 | C  | 1.725586534  | -1.496615529 | 3.367341757 |
| C | -1.307035089 | 3.237365723 | 7.795547009 | H  | 1.495090485  | -1.943096995 | 2.394814968 |
| H | -1.106010318 | 4.163510799 | 7.245894432 | H  | 1.945468664  | -0.442016900 | 3.188188553 |
| H | -0.776387751 | 3.268772125 | 8.756896973 | H  | 2.621595860  | -1.996577382 | 3.753468037 |
| O | -0.826154172 | 2.117141724 | 7.078318119 | C  | 0.184699491  | -3.189816475 | 4.376944542 |
| H | 0.064612404  | 0.461385906 | 6.710793972 | H  | -0.106794208 | -3.554308414 | 3.385727644 |
| O | 0.193802476  | 2.031796455 | 3.156537533 | H  | 1.061780691  | -3.768217564 | 4.695637226 |
| C | -0.813412011 | 1.612374663 | 2.439526558 | H  | -0.631986201 | -3.378018379 | 5.075642586 |
| O | -1.919989347 | 1.278721571 | 2.881204367 | C  | -0.687128067 | -0.923734069 | 3.714572668 |
| C | -0.475443512 | 1.498846769 | 0.962172747 | H  | -1.604778647 | -1.133776665 | 4.267671585 |
| H | 0.166477919  | 0.622281253 | 0.821051657 | H  | -0.509693801 | 0.152277559  | 3.665798903 |
| H | 0.083714053  | 2.374905348 | 0.625427723 | H  | -0.839950860 | -1.253358126 | 2.681699753 |
| H | -1.388276100 | 1.374199986 | 0.378320575 | C  | 2.061774492  | -0.240620673 | 5.856561661 |
| O | -0.670648515 | 4.095853806 | 4.858191013 | C  | 3.317762852  | -0.789060473 | 6.142957687 |
| C | 0.386415362  | 4.880723000 | 4.878352165 | N  | 1.934510946  | 1.095378518  | 5.650947094 |
| O | 1.532387495  | 4.534795284 | 5.146939754 | C  | 4.447046280  | 0.015981637  | 6.205914974 |
| C | 0.044755235  | 6.317509174 | 4.506731033 | H  | 3.391989470  | -1.858183265 | 6.307981491 |
| H | -0.934230387 | 6.606396198 | 4.896340847 | C  | 3.036041021  | 1.879207850  | 5.714375019 |
| H | 0.005482496  | 6.393528938 | 3.414833307 | C  | 4.302057743  | 1.384552360  | 5.988674164 |
| H | 0.822336376  | 6.986299992 | 4.879335403 | H  | 5.419291496  | -0.415725768 | 6.424564838 |
|   |              |             |             | H  | 2.879606485  | 2.930474281  | 5.507116795 |
|   |              |             |             | H  | 5.146870136  | 2.063441277  | 6.027197361 |
|   |              |             |             | H  | -2.155084372 | 0.192800075  | 8.452628136 |
|   |              |             |             | H  | -3.401922703 | -0.384534657 | 7.339471340 |
|   |              |             |             | H  | -2.467441082 | 1.216171861  | 5.570049763 |
|   |              |             |             | C  | -3.290487289 | 2.444917679  | 7.179969311 |
|   |              |             |             | H  | -4.248119354 | 2.030409336  | 7.505429268 |

B8



|        |              |              |             |   |              |              |             |
|--------|--------------|--------------|-------------|---|--------------|--------------|-------------|
| H      | -3.476732254 | 3.177687168  | 6.388949394 | C | 1.041945577  | -0.744713724 | 5.644869328 |
| C      | -2.486193895 | 3.087252617  | 8.323004723 | H | 0.953165174  | -1.469762206 | 6.461579800 |
| H      | -2.830258131 | 4.096163750  | 8.563673973 | C | 1.390671134  | -1.577405453 | 4.317050457 |
| H      | -2.551941156 | 2.480547428  | 9.232276917 | C | 2.290386438  | -0.786281526 | 3.341183901 |
| C      | -1.062916636 | 3.101565361  | 7.765069962 | H | 2.411688328  | -1.360406995 | 2.415626287 |
| H      | -0.839803159 | 4.005990028  | 7.196053505 | H | 1.864628553  | 0.187503129  | 3.085987806 |
| H      | -0.287650526 | 2.924591541  | 8.515722275 | H | 3.292033434  | -0.609651864 | 3.752462864 |
| O      | -1.010327816 | 1.972606182  | 6.820287228 | C | 2.133867264  | -2.853838682 | 4.760111332 |
| H      | -0.054479148 | 0.385587782  | 6.838360786 | H | 2.426559448  | -3.446430683 | 3.885992527 |
| O      | 1.427155137  | 2.998107195  | 3.582172155 | H | 3.052075624  | -2.616194248 | 5.313512802 |
| C      | 1.419653654  | 2.427970648  | 2.396874905 | H | 1.498116970  | -3.480335712 | 5.398378372 |
| O      | 0.803644240  | 1.416999340  | 2.085906744 | C | 0.103412770  | -1.971082687 | 3.565871716 |
| C      | 2.311936855  | 3.177445173  | 1.411746264 | H | -0.573691905 | -2.546708822 | 4.201716423 |
| H      | 3.350548506  | 3.150578499  | 1.757387877 | H | -0.417359084 | -1.077363014 | 3.205980778 |
| H      | 2.012337446  | 4.227737904  | 1.357445240 | H | 0.366285026  | -2.587897301 | 2.698148251 |
| H      | 2.239300489  | 2.712497473  | 0.427825600 | C | 2.156825781  | 0.229936048  | 5.946521759 |
| O      | -1.319869161 | 3.269370556  | 4.249617577 | C | 3.300535917  | -0.129571274 | 6.661283493 |
| C      | -1.388616800 | 4.549098492  | 4.526308537 | N | 2.041229010  | 1.449523330  | 5.386940479 |
| O      | -0.696523786 | 5.143444538  | 5.352571964 | C | 4.352461338  | 0.780028343  | 6.755855083 |
| C      | -2.443808794 | 5.263134956  | 3.692679644 | H | 3.359227657  | -1.106036663 | 7.130138874 |
| H      | -3.353757620 | 4.661684990  | 3.618939638 | C | 3.052555561  | 2.318642378  | 5.463827610 |
| H      | -2.057730198 | 5.396357536  | 2.676732063 | C | 4.238719463  | 2.021684647  | 6.130842686 |
| H      | -2.661786079 | 6.240229607  | 4.126223564 | H | 5.252193928  | 0.519783616  | 7.306486607 |
| =====  |              |              |             | H | 2.890176773  | 3.271902800  | 4.973577499 |
| B6-TS' |              |              |             | H | 5.041648388  | 2.750394106  | 6.167498589 |
| =====  |              |              |             | H | -3.441606522 | 0.004281651  | 6.140468121 |
| C      | -2.338901281 | 1.739687443  | 5.422528267 | H | -2.891621113 | -0.112727344 | 4.464947224 |
| C      | -2.612073898 | 0.237879932  | 5.464420319 | H | -2.644112349 | 2.213442564  | 4.489963055 |
| C      | -1.412032127 | -0.626473248 | 5.865865707 | C | -2.785482883 | 2.513454676  | 6.642681122 |
| O      | -1.523792386 | -1.771497011 | 6.301932812 | H | -3.874524593 | 2.360335588  | 6.706895828 |
| N      | -0.226363212 | -0.027462551 | 5.592640400 | H | -2.632071972 | 3.587060690  | 6.481677055 |
| Pd     | -0.272895068 | 1.903912902  | 5.198668957 | C | -2.142139196 | 2.081439972  | 7.970997334 |
|        |              |              |             | H | -2.779004335 | 2.388116837  | 8.809424400 |

|       |              |              |             |   |              |              |             |
|-------|--------------|--------------|-------------|---|--------------|--------------|-------------|
| H     | -2.053384304 | 0.990104079  | 8.021858215 | C | 1.577138662  | -1.054706335 | 3.152842045 |
| C     | -0.770888209 | 2.721941710  | 8.176292419 | H | 1.751510620  | -1.768423796 | 2.339984179 |
| H     | -0.903042853 | 3.815770149  | 8.245953560 | H | 0.725641191  | -0.424424797 | 2.886581421 |
| H     | -0.351815253 | 2.379415751  | 9.133275986 | H | 2.460168600  | -0.414321810 | 3.231664419 |
| O     | 0.179945007  | 2.426693678  | 7.164853096 | C | 2.514426947  | -2.671070337 | 4.846199989 |
| H     | 0.694017351  | 3.542254448  | 6.784900665 | H | 2.685549736  | -3.435837746 | 4.081468105 |
| O     | -0.617643058 | 1.472645521  | 3.252517462 | H | 3.429691792  | -2.078293562 | 4.925191402 |
| C     | 0.223368987  | 2.068231821  | 2.425787210 | H | 2.356095314  | -3.189379692 | 5.799777031 |
| O     | 1.181435585  | 2.761746883  | 2.749947071 | C | 0.099573508  | -2.763965607 | 4.230695724 |
| C     | -0.111593068 | 1.754564643  | 0.974035144 | H | -0.198339015 | -3.269455194 | 5.152359486 |
| H     | -1.164609551 | 1.966507435  | 0.769814789 | H | -0.770733237 | -2.223179102 | 3.851952076 |
| H     | 0.053202778  | 0.687868536  | 0.790417373 | H | 0.373194158  | -3.518637180 | 3.484514952 |
| H     | 0.529170454  | 2.344109774  | 0.316706508 | C | 2.092347860  | 0.154235259  | 5.878476143 |
| O     | -0.488749981 | 3.992938280  | 4.764662266 | C | 3.180265665  | -0.175665781 | 6.689845562 |
| C     | 0.330484957  | 4.795314312  | 5.284657478 | N | 2.057972670  | 1.325425506  | 5.215730190 |
| O     | 1.003878713  | 4.548957348  | 6.354998589 | C | 4.260412693  | 0.700841725  | 6.766845226 |
| C     | 0.578920960  | 6.110506535  | 4.599545002 | H | 3.175094128  | -1.107476711 | 7.244385242 |
| H     | -0.365789860 | 6.530215740  | 4.246655464 | C | 3.100719690  | 2.161487341  | 5.270593643 |
| H     | 1.198500633  | 5.904069901  | 3.719153643 | C | 4.235698223  | 1.882620573  | 6.025907993 |
| H     | 1.095341802  | 6.808898449  | 5.259478569 | H | 5.114246368  | 0.460402638  | 7.394237518 |
| ===== |              |              |             | H | 2.994895458  | 3.066989660  | 4.684447289 |
| B7'   |              |              |             | H | 5.064352512  | 2.582516432  | 6.046607494 |
| ===== |              |              |             | H | -3.535676241 | 0.177074000  | 5.814054489 |
| C     | -2.281167746 | 1.876134634  | 5.290477276 | H | -2.814714909 | 0.096071444  | 4.196218967 |
| C     | -2.632124424 | 0.392430395  | 5.234425068 | H | -2.540256023 | 2.424991369  | 4.385193825 |
| C     | -1.504245281 | -0.514198422 | 5.743125439 | C | -2.707952499 | 2.593753815  | 6.551829338 |
| O     | -1.696045876 | -1.562317967 | 6.353481770 | H | -3.805950165 | 2.510220289  | 6.583635330 |
| N     | -0.282903939 | -0.061726697 | 5.339725018 | H | -2.480154991 | 3.662732363  | 6.467599392 |
| Pd    | -0.206118241 | 1.914144397  | 5.111198425 | C | -2.127657890 | 2.034304380  | 7.861775875 |
| C     | 0.943429530  | -0.804972529 | 5.633676052 | H | -2.750021219 | 2.355215311  | 8.705739021 |
| H     | 0.774780035  | -1.400992751 | 6.539905071 | H | -2.139797926 | 0.938800275  | 7.860125065 |
| C     | 1.292569518  | -1.815683126 | 4.459591866 | C | -0.709575355 | 2.539401054  | 8.116425514 |
|       |              |              |             | H | -0.745125353 | 3.638018608  | 8.221555710 |

|        |              |              |             |   |              |              |             |
|--------|--------------|--------------|-------------|---|--------------|--------------|-------------|
| H      | -0.341956615 | 2.129428148  | 9.068039894 | H | 2.495200157  | -0.393897206 | 3.094672918 |
| O      | 0.237715319  | 2.189988613  | 7.118518353 | C | 2.644851685  | -2.718886852 | 4.619942188 |
| H      | 0.896336555  | 3.340096951  | 6.823754311 | H | 2.832880259  | -3.443607092 | 3.820327282 |
| O      | -0.482607782 | 1.708637714  | 3.116197348 | H | 3.542810440  | -2.102499962 | 4.726963520 |
| C      | 0.412030369  | 2.350862741  | 2.389170885 | H | 2.506143808  | -3.281397104 | 5.551311016 |
| O      | 1.347211838  | 3.023490429  | 2.812011957 | C | 0.206957430  | -2.821831226 | 4.058047295 |
| C      | 0.181095153  | 2.128919363  | 0.900856614 | H | -0.028947555 | -3.390534639 | 4.960950851 |
| H      | -0.880155325 | 2.206004858  | 0.654511213 | H | -0.688025415 | -2.259069204 | 3.778223038 |
| H      | 0.511642158  | 1.118095040  | 0.640690804 | H | 0.435418308  | -3.521713734 | 3.245699167 |
| H      | 0.761045694  | 2.855122089  | 0.330185205 | C | 2.234723330  | -0.017808396 | 5.869871140 |
| O      | -0.295796394 | 4.049734116  | 4.900244236 | C | 3.151600122  | -0.371544123 | 6.866823196 |
| C      | 0.596831918  | 4.726150513  | 5.468004704 | N | 2.345787048  | 1.136677504  | 5.196043968 |
| O      | 1.266483188  | 4.323198318  | 6.497405529 | C | 4.209878445  | 0.489767015  | 7.149887562 |
| C      | 0.952823520  | 6.071660519  | 4.904026508 | H | 3.031666040  | -1.305944324 | 7.405534744 |
| H      | 0.044520430  | 6.608083248  | 4.621768951 | C | 3.360445499  | 1.964699388  | 5.468416691 |
| H      | 1.527152419  | 5.889627457  | 3.988933325 | C | 4.324165821  | 1.682792306  | 6.435300827 |
| H      | 1.547967196  | 6.652905941  | 5.608586788 | H | 4.931731701  | 0.235563904  | 7.921451569 |
| =====  |              |              |             | H | 3.378882408  | 2.876563787  | 4.877337933 |
| B7'-TS |              |              |             | H | 5.133515358  | 2.381020308  | 6.625078678 |
| =====  |              |              |             | H | -2.829968214 | 0.071480803  | 7.223778725 |
| C      | -2.454296589 | 1.567793250  | 5.734217644 | H | -3.290898800 | -0.372120678 | 5.573936939 |
| C      | -2.532495499 | 0.148412496  | 6.176336765 | H | -2.438672304 | 1.673902869  | 4.649064541 |
| C      | -1.235158443 | -0.683961511 | 6.056503773 | C | -3.228704453 | 2.678396225  | 6.393045902 |
| O      | -1.246899128 | -1.795355082 | 6.588230133 | H | -4.279509544 | 2.357286692  | 6.436364174 |
| N      | -0.183911845 | -0.172443852 | 5.351094246 | H | -3.188987494 | 3.567564487  | 5.754160881 |
| Pd     | -0.134588227 | 1.837946057  | 5.007246971 | C | -2.690890551 | 3.014319897  | 7.788973331 |
| C      | 1.080578566  | -0.932446480 | 5.501165867 | H | -3.114862919 | 3.949905157  | 8.168313980 |
| H      | 0.923416495  | -1.604989171 | 6.350471497 | H | -2.938964605 | 2.216179132  | 8.496544838 |
| C      | 1.400899887  | -1.873613238 | 4.281126499 | C | -1.171755433 | 3.082045078  | 7.610414982 |
| C      | 1.650901914  | -1.081956267 | 2.991903782 | H | -0.874682724 | 3.989221573  | 7.069661617 |
| H      | 1.871038437  | -1.771601796 | 2.167657614 | H | -0.650661409 | 3.066051722  | 8.577105522 |
| H      | 0.768663943  | -0.494964510 | 2.732922316 | O | -0.811731696 | 1.902763009  | 6.927692413 |
|        |              |              |             | H | -0.839677393 | 2.948600769  | 2.770888805 |

|    |              |              |             |   |              |              |             |
|----|--------------|--------------|-------------|---|--------------|--------------|-------------|
| O  | 0.095358513  | 1.722589016  | 2.890382290 | H | 3.436004639  | -2.167782307 | 4.389005184 |
| C  | 1.202247858  | 2.258708954  | 2.363207340 | H | 2.587076187  | -3.130371332 | 5.618639469 |
| O  | 1.906397820  | 3.084936619  | 2.922887802 | C | 0.023673370  | -2.783107996 | 4.539765835 |
| C  | 1.468154311  | 1.783342361  | 0.945276499 | H | -0.059704453 | -3.209243059 | 5.542128086 |
| H  | 0.564774454  | 1.888580799  | 0.336771876 | H | -0.897749543 | -2.230535269 | 4.339302540 |
| H  | 1.728434324  | 0.721591651  | 0.958228767 | H | 0.098546565  | -3.596555710 | 3.808854818 |
| H  | 2.285843611  | 2.358395576  | 0.508559167 | C | 2.282415628  | 0.282466769  | 5.433976650 |
| O  | -0.295382798 | 3.983054399  | 4.827760220 | C | 3.596572399  | 0.008426364  | 5.831726551 |
| C  | -0.789456129 | 4.540552616  | 3.831624031 | N | 1.970181584  | 1.499364734  | 4.947212219 |
| O  | -1.212219357 | 3.907567978  | 2.768901348 | C | 4.573140144  | 0.988150239  | 5.703109741 |
| C  | -0.930997491 | 6.034352779  | 3.776930332 | H | 3.831869125  | -0.949625075 | 6.277709007 |
| H  | -0.910813332 | 6.454465866  | 4.782254696 | C | 2.902665615  | 2.456412554  | 4.842039585 |
| H  | -1.846810460 | 6.311962605  | 3.250882626 | C | 4.228857994  | 2.241145134  | 5.190171242 |
| H  | -0.082099289 | 6.430076122  | 3.208399773 | H | 5.591910362  | 0.785024524  | 6.021090508 |
|    |              |              |             | H | 2.545161247  | 3.419278860  | 4.486424446 |
|    |              |              |             | H | 4.960148811  | 3.035903454  | 5.088280678 |
|    |              |              |             | H | -2.182720423 | 1.003965259  | 7.570619583 |
|    |              |              |             | H | -3.182361603 | -0.104038157 | 6.630494118 |
|    |              |              |             | H | -2.469687939 | 0.962980926  | 4.515452862 |
|    |              |              |             | C | -3.140324831 | 2.735514641  | 5.600580692 |
|    |              |              |             | H | -3.887824059 | 2.541211843  | 6.382798672 |
|    |              |              |             | H | -3.696154356 | 2.881977081  | 4.665264606 |
|    |              |              |             | C | -2.436980963 | 4.069257259  | 5.938337803 |
| Pd | -0.260630637 | 1.851808906  | 5.161129951 | H | -3.217782736 | 4.826478004  | 6.087574482 |
| C  | 1.175469756  | -0.757604718 | 5.552395821 | H | -1.875424147 | 3.979640245  | 6.870456696 |
| H  | 1.313304305  | -1.268864989 | 6.513001919 | C | -1.502043009 | 4.576787472  | 4.831583500 |
| C  | 1.253700614  | -1.862358928 | 4.420202732 | H | -2.063975573 | 4.586163521  | 3.876702070 |
| C  | 1.270292640  | -1.233139277 | 3.017471313 | H | -1.242158651 | 5.622896671  | 5.058359623 |
| H  | 1.322959185  | -2.019627094 | 2.255515814 | O | -0.291986108 | 3.861814022  | 4.695230484 |
| H  | 0.363550186  | -0.650229573 | 2.853368521 | H | 0.071083553  | 3.626470566  | 3.171175957 |
| H  | 2.135150194  | -0.573736370 | 2.877995491 | O | -0.601470828 | 1.362881303  | 3.083632708 |
| C  | 2.519149065  | -2.724777222 | 4.602295876 | C | -0.214152381 | 2.055143356  | 2.118866682 |
| H  | 2.489554167  | -3.572947025 | 3.909515858 | O | 0.194525942  | 3.285429716  | 2.205724001 |

=====  
B7"  
=====

|   |              |             |              |   |              |              |             |
|---|--------------|-------------|--------------|---|--------------|--------------|-------------|
| C | -0.171975151 | 1.444551587 | 0.746194899  | H | -0.129672691 | -2.862276316 | 4.678051472 |
| H | -1.051808357 | 0.815757275 | 0.598096132  | H | -0.314892858 | -1.621633768 | 3.434351921 |
| H | 0.710035026  | 0.797073007 | 0.693517745  | H | 0.589663386  | -3.104784966 | 3.064371586 |
| H | -0.105724379 | 2.213406086 | -0.023611072 | C | 2.542259693  | 0.052618962  | 6.015185356 |
| O | -0.179663926 | 2.432720900 | 7.079196453  | C | 3.247148037  | -0.298761755 | 7.173052311 |
| C | 0.646279871  | 1.960124612 | 7.994853973  | N | 2.866164684  | 1.134619117  | 5.288528442 |
| O | 1.442801714  | 1.044563532 | 7.883892536  | C | 4.317910194  | 0.489758492  | 7.584194660 |
| C | 0.466929317  | 2.737210989 | 9.298356056  | H | 2.940645933  | -1.167585492 | 7.746281147 |
| H | -0.551055908 | 2.596177101 | 9.674057007  | C | 3.888098240  | 1.893947244  | 5.696052551 |
| H | 0.610083163  | 3.806754827 | 9.121452332  | C | 4.650308609  | 1.616601586  | 6.831100464 |
| H | 1.186012626  | 2.374646425 | 10.033752441 | H | 4.873745918  | 0.237910867  | 8.483627319 |
|   |              |             |              | H | 4.104988575  | 2.768647432  | 5.084808350 |
|   |              |             |              | H | 5.472974300  | 2.266238213  | 7.114749432 |
|   |              |             |              | H | -1.741613507 | 1.295746207  | 7.179527283 |
|   |              |             |              | H | -2.977161884 | 0.312558234  | 6.397650719 |
|   |              |             |              | H | -2.688247204 | 1.574570060  | 4.235322475 |
|   |              |             |              | C | -3.367454052 | 2.972805738  | 5.830590248 |
|   |              |             |              | H | -3.971774578 | 2.514147282  | 6.622374058 |
|   |              |             |              | H | -4.038873672 | 3.376548529  | 5.065769196 |
|   |              |             |              | C | -2.504326582 | 4.105973721  | 6.419364452 |
|   |              |             |              | H | -3.126090288 | 4.893134117  | 6.857148170 |
|   |              |             |              | H | -1.848843217 | 3.708794117  | 7.200155735 |
|   |              |             |              | C | -1.658635259 | 4.610190868  | 5.242263794 |
|   |              |             |              | H | -2.208801508 | 5.367710114  | 4.666123390 |
|   |              |             |              | H | -0.708162129 | 5.026043415  | 5.593974113 |
|   |              |             |              | O | -1.413531780 | 3.492619991  | 4.402883530 |
|   |              |             |              | H | -1.537254572 | 3.266738176  | 2.937046528 |
|   |              |             |              | O | -0.370113909 | 1.178957582  | 2.819037914 |
|   |              |             |              | C | -0.952591062 | 1.750960112  | 1.879737139 |
|   |              |             |              | O | -1.575961113 | 2.897032499  | 1.974587321 |
|   |              |             |              | C | -0.947538257 | 1.128736496  | 0.510703564 |
|   |              |             |              | H | -1.015485287 | 0.043470766  | 0.604603291 |
|   |              |             |              | H | 0.009620442  | 1.364472628  | 0.032114994 |

=====

B7"-TS

=====

|    |              |              |             |   |              |             |             |
|----|--------------|--------------|-------------|---|--------------|-------------|-------------|
| C  | -2.464296818 | 1.922169805  | 5.239749908 | H | -2.688247204 | 1.574570060 | 4.235322475 |
| C  | -2.027040482 | 0.849768579  | 6.221298218 | C | -3.367454052 | 2.972805738 | 5.830590248 |
| C  | -0.974243760 | -0.269601017 | 5.988737583 | H | -3.971774578 | 2.514147282 | 6.622374058 |
| O  | -1.235669374 | -1.384762764 | 6.446713924 | H | -4.038873672 | 3.376548529 | 5.065769196 |
| N  | 0.186627701  | 0.069168411  | 5.378893852 | C | -2.504326582 | 4.105973721 | 6.419364452 |
| Pd | 0.088029914  | 1.966625452  | 4.781134129 | H | -3.126090288 | 4.893134117 | 6.857148170 |
| C  | 1.359736800  | -0.783456564 | 5.550162315 | H | -1.848843217 | 3.708794117 | 7.200155735 |
| H  | 1.104007363  | -1.473544717 | 6.362871647 | C | -1.658635259 | 4.610190868 | 5.242263794 |
| C  | 1.680067420  | -1.687152982 | 4.302287102 | H | -2.208801508 | 5.367710114 | 4.666123390 |
| C  | 2.276551723  | -0.906456649 | 3.117785215 | H | -0.708162129 | 5.026043415 | 5.593974113 |
| H  | 2.394667864  | -1.583333254 | 2.262134790 | O | -1.413531780 | 3.492619991 | 4.402883530 |
| H  | 1.621421456  | -0.086749047 | 2.818757296 | H | -1.537254572 | 3.266738176 | 2.937046528 |
| H  | 3.257796288  | -0.487729698 | 3.353760719 | O | -0.370113909 | 1.178957582 | 2.819037914 |
| C  | 2.682881594  | -2.767839670 | 4.752469540 | C | -0.952591062 | 1.750960112 | 1.879737139 |
| H  | 2.930212259  | -3.430493593 | 3.915549994 | O | -1.575961113 | 2.897032499 | 1.974587321 |
| H  | 3.617108822  | -2.324455023 | 5.114224911 | C | -0.947538257 | 1.128736496 | 0.510703564 |
| H  | 2.267580748  | -3.386567831 | 5.556974888 | H | -1.015485287 | 0.043470766 | 0.604603291 |
| C  | 0.374612927  | -2.365259171 | 3.844918013 | H | 0.009620442  | 1.364472628 | 0.032114994 |

|       |              |              |              |   |              |              |             |
|-------|--------------|--------------|--------------|---|--------------|--------------|-------------|
| H     | -1.757572412 | 1.522998333  | -0.104046620 | C | 2.318377256  | 0.230046630  | 5.230437279 |
| O     | 0.649617672  | 2.943583250  | 6.438500404  | C | 3.665945053  | -0.054264337 | 5.476984501 |
| C     | 0.809345722  | 2.447837114  | 7.650759697  | N | 1.957755804  | 1.453763604  | 4.811765194 |
| O     | 0.418782771  | 1.353658557  | 8.059944153  | C | 4.628333569  | 0.919101417  | 5.233431816 |
| C     | 1.588678718  | 3.410940886  | 8.543549538  | H | 3.952749014  | -1.007672787 | 5.897736073 |
| H     | 1.349050045  | 4.455381870  | 8.316531181  | C | 2.877243996  | 2.400087595  | 4.585832119 |
| H     | 2.658262491  | 3.258108377  | 8.349415779  | C | 4.236409664  | 2.171838284  | 4.760862350 |
| H     | 1.381175876  | 3.184059620  | 9.591659546  | H | 5.675467014  | 0.705530345  | 5.428131104 |
|       |              |              |              | H | 2.485251188  | 3.366048813  | 4.278121948 |
|       |              |              |              | H | 4.956506252  | 2.958939314  | 4.564281940 |
|       |              |              |              | H | -2.856993198 | 0.386556059  | 7.201001167 |
|       |              |              |              | H | -3.019413948 | -0.363644272 | 5.605939388 |
|       |              |              |              | H | -2.645864487 | 1.654201388  | 4.496464252 |
|       |              |              |              | C | -2.871100187 | 2.846919298  | 6.311923504 |
|       |              |              |              | H | -2.356767893 | 2.886875629  | 7.275052547 |
|       |              |              |              | H | -3.924549341 | 2.607774734  | 6.530441284 |
|       |              |              |              | C | -2.800634623 | 4.222959042  | 5.606472969 |
|       |              |              |              | H | -3.721270800 | 4.406825066  | 5.036377907 |
|       |              |              |              | H | -2.751611948 | 4.994677067  | 6.382535458 |
|       |              |              |              | C | -1.611558318 | 4.387533188  | 4.634570122 |
|       |              |              |              | H | -1.848690987 | 3.913288116  | 3.667523146 |
|       |              |              |              | H | -1.478604317 | 5.461193085  | 4.423764706 |
|       |              |              |              | O | -0.382687181 | 3.933488369  | 5.127588272 |
|       |              |              |              | H | -0.601630688 | -0.307120383 | 4.454103947 |
|       |              |              |              | O | -0.515449166 | 1.978639245  | 3.172072411 |
|       |              |              |              | C | -1.049116135 | 0.998183131  | 2.525492668 |
|       |              |              |              | O | -1.418837190 | -0.088059783 | 3.021453142 |
|       |              |              |              | C | -1.185716629 | 1.225094676  | 1.031415224 |
|       |              |              |              | H | -1.154391646 | 2.286401033  | 0.783600986 |
|       |              |              |              | H | -2.113227367 | 0.768374264  | 0.679239094 |
|       |              |              |              | H | -0.352879047 | 0.719161570  | 0.530651152 |
|       |              |              |              | O | -0.226144165 | 2.161882162  | 7.254240036 |
|       |              |              |              | C | 0.722838223  | 1.713842154  | 8.047217369 |
| ===== |              |              |              |   |              |              |             |
| B7"   |              |              |              |   |              |              |             |
| ===== |              |              |              |   |              |              |             |
| C     | -2.305130005 | 1.685122728  | 5.531011581  | H | -2.645864487 | 1.654201388  | 4.496464252 |
| C     | -2.397460222 | 0.306762934  | 6.213287830  | C | -2.871100187 | 2.846919298  | 6.311923504 |
| C     | -1.064224005 | -0.414383620 | 6.443294048  | H | -2.356767893 | 2.886875629  | 7.275052547 |
| O     | -0.813266039 | -1.075704455 | 7.422032356  | H | -3.924549341 | 2.607774734  | 6.530441284 |
| N     | -0.122683525 | -0.189601734 | 5.384020805  | C | -2.800634623 | 4.222959042  | 5.606472969 |
| Pd    | -0.257383674 | 1.959527612  | 5.224410057  | H | -3.721270800 | 4.406825066  | 5.036377907 |
| C     | 1.225181460  | -0.814977050 | 5.477030277  | H | -2.751611948 | 4.994677067  | 6.382535458 |
| H     | 1.325612068  | -1.130213380 | 6.518593311  | C | -1.611558318 | 4.387533188  | 4.634570122 |
| C     | 1.310919285  | -2.101544619 | 4.563738823  | H | -1.848690987 | 3.913288116  | 3.667523146 |
| C     | 1.483155847  | -1.737006783 | 3.076598406  | H | -1.478604317 | 5.461193085  | 4.423764706 |
| H     | 1.576595664  | -2.651802778 | 2.480566740  | O | -0.382687181 | 3.933488369  | 5.127588272 |
| H     | 0.624564052  | -1.181720734 | 2.694179773  | H | -0.601630688 | -0.307120383 | 4.454103947 |
| H     | 2.386969328  | -1.140291333 | 2.915999413  | O | -0.515449166 | 1.978639245  | 3.172072411 |
| C     | 2.494964361  | -2.992938757 | 4.997152805  | C | -1.049116135 | 0.998183131  | 2.525492668 |
| H     | 2.415857553  | -3.967445850 | 4.504281044  | O | -1.418837190 | -0.088059783 | 3.021453142 |
| H     | 3.459112406  | -2.571664810 | 4.705955029  | C | -1.185716629 | 1.225094676  | 1.031415224 |
| H     | 2.499593973  | -3.166446209 | 6.079268932  | H | -1.154391646 | 2.286401033  | 0.783600986 |
| C     | 0.020097919  | -2.932065010 | 4.749785900  | H | -2.113227367 | 0.768374264  | 0.679239094 |
| H     | -0.172048703 | -3.134297132 | 5.808019161  | H | -0.352879047 | 0.719161570  | 0.530651152 |
| H     | -0.856919944 | -2.435234547 | 4.325129986  | O | -0.226144165 | 2.161882162  | 7.254240036 |
| H     | 0.123592444  | -3.890323877 | 4.230766773  | C | 0.722838223  | 1.713842154  | 8.047217369 |

|   |              |             |              |   |              |              |             |
|---|--------------|-------------|--------------|---|--------------|--------------|-------------|
| O | 1.717306137  | 1.081086397 | 7.720729351  | C | 4.389900684  | 1.058002949  | 6.625323772 |
| C | 0.413303643  | 2.043406963 | 9.503291130  | H | 3.373148680  | -0.727795124 | 7.295516491 |
| H | -0.406450748 | 1.399533510 | 9.838739395  | C | 3.289647579  | 2.153236151  | 4.806923866 |
| H | 0.090788454  | 3.082218170 | 9.605714798  | C | 4.349955082  | 2.109930515  | 5.707963943 |
| H | 1.296249509  | 1.852200031 | 10.114515305 | H | 5.187714100  | 0.992290497  | 7.359869480 |
|   |              |             |              | H | 3.198996067  | 2.963447809  | 4.087406158 |
|   |              |             |              | H | 5.110703468  | 2.883934975  | 5.699291706 |
|   |              |             |              | H | -1.950247884 | 1.075563908  | 7.398280144 |
|   |              |             |              | H | -3.127768517 | 0.154958516  | 6.496180534 |
|   |              |             |              | H | -2.842873573 | 1.641368389  | 4.480216503 |
|   |              |             |              | C | -3.344925165 | 2.915348053  | 6.245649338 |
|   |              |             |              | H | -3.906406403 | 2.415654421  | 7.044060707 |
|   |              |             |              | H | -4.052278519 | 3.397152185  | 5.563674450 |
|   |              |             |              | C | -2.428658724 | 3.991879225  | 6.858122826 |
|   |              |             |              | H | -3.017090321 | 4.776314259  | 7.345198154 |
|   |              |             |              | H | -1.764319777 | 3.541653156  | 7.602079868 |
|   |              |             |              | C | -1.588318706 | 4.562315941  | 5.694786072 |
|   |              |             |              | H | -2.110401154 | 5.414062500  | 5.233730316 |
|   |              |             |              | H | -0.593856514 | 4.866223335  | 6.039411545 |
|   |              |             |              | O | -1.510737896 | 3.596200228  | 4.669744968 |
|   |              |             |              | H | -0.446191758 | -0.409495056 | 4.318299770 |
|   |              |             |              | O | -0.720360577 | 1.722998142  | 2.867533207 |
|   |              |             |              | C | -1.193472028 | 0.641975105  | 2.344915390 |
|   |              |             |              | O | -1.402430773 | -0.427954257 | 2.951367855 |
|   |              |             |              | C | -1.455913544 | 0.739269137  | 0.851930201 |
|   |              |             |              | H | -1.788008213 | 1.741813898  | 0.576560080 |
|   |              |             |              | H | -2.189354420 | -0.012418329 | 0.555772483 |
|   |              |             |              | H | -0.516848862 | 0.536120415  | 0.324829936 |
|   |              |             |              | O | 0.454982817  | 2.779387951  | 6.573934078 |
|   |              |             |              | C | 0.753454626  | 2.111027241  | 7.655769348 |
|   |              |             |              | O | 0.477960259  | 0.932902992  | 7.879843712 |
|   |              |             |              | C | 1.537313581  | 2.948987007  | 8.656357765 |
|   |              |             |              | H | 1.145296574  | 3.967425108  | 8.710990906 |

=====  
B7"-TS  
=====

|          |              |              |             |          |              |              |              |
|----------|--------------|--------------|-------------|----------|--------------|--------------|--------------|
| H        | 2.574471235  | 3.007742643  | 8.309370041 | H        | 1.514323950  | 2.471723318  | 9.636958122  |
| =====    |              |              |             |          |              |              |              |
| DG of A7 |              |              |             |          |              |              |              |
| =====    |              |              |             |          |              |              |              |
| C        | -2.003298044 | 1.733590007  | 5.658583641 | C        | -2.870291233 | 1.614654064  | 4.418304443  |
| C        | -2.082743168 | 0.537379503  | 6.603325844 | H        | -3.903799295 | 1.769015670  | 4.767639160  |
| C        | -1.132419348 | -0.605732203 | 6.287368298 | H        | -2.829074860 | 0.592023849  | 4.021880627  |
| O        | -1.217699528 | -1.718702674 | 6.729433060 | C        | -2.549407005 | 2.626377583  | 3.313450098  |
| N        | -0.067795075 | -0.231654331 | 5.328826904 | H        | -3.383454561 | 2.682637691  | 2.604788065  |
| C        | 1.187108397  | -1.046050310 | 5.409080505 | H        | -2.430223942 | 3.615048409  | 3.764827967  |
| H        | 1.057275772  | -1.705595374 | 6.268937588 | C        | -1.247769475 | 2.233288765  | 2.565388918  |
| C        | 1.379370332  | -1.948555589 | 4.136713028 | H        | -1.507869244 | 1.670562267  | 1.654581547  |
| C        | 1.741281748  | -1.111371160 | 2.895477057 | H        | -0.708724916 | 3.138456106  | 2.251086950  |
| H        | 1.776550531  | -1.760641098 | 2.013725758 | O        | -0.411910772 | 1.372675180  | 3.297996759  |
| H        | 1.020103097  | -0.310499549 | 2.707242966 | H        | -0.468513906 | -0.279834867 | 4.379312992  |
| H        | 2.723052740  | -0.642273486 | 3.007597208 | H        | -2.121820688 | 2.691059113  | 6.165179253  |
| C        | 2.506985426  | -2.963103771 | 4.415449619 |          |              |              |              |
| H        | 2.613593340  | -3.637798786 | 3.559735298 | =====    |              |              |              |
| H        | 3.470988512  | -2.470277309 | 4.566015720 | MF of A7 |              |              |              |
| H        | 2.289839506  | -3.575375557 | 5.298816204 | =====    |              |              |              |
| C        | 0.080760323  | -2.743698359 | 3.879588842 | Pd       | 0.017698042  | 1.873292089  | 5.180344105  |
| H        | -0.259439796 | -3.256942987 | 4.783556938 | O        | 0.510912180  | 2.437598705  | 7.108030319  |
| H        | -0.738032997 | -2.106566191 | 3.526029110 | C        | 0.812105238  | 1.570464373  | 8.029578209  |
| H        | 0.254844755  | -3.489200592 | 3.097326756 | O        | 0.623475432  | 0.350105375  | 7.971038342  |
| C        | 2.369470835  | -0.136092395 | 5.684048176 | C        | 1.459309936  | 2.210163832  | 9.251514435  |
| C        | 3.465821266  | -0.594228566 | 6.419640541 | H        | 0.848811567  | 3.043146372  | 9.611198425  |
| N        | 2.329123497  | 1.108847618  | 5.181966782 | H        | 2.433451891  | 2.618214846  | 8.964273453  |
| C        | 4.556160450  | 0.250821829  | 6.603229046 | H        | 1.587067246  | 1.465916634  | 10.038647652 |
| H        | 3.447472334  | -1.587321520 | 6.854370594 | O        | -0.308241785 | 3.859951496  | 4.928243160  |
| C        | 3.376320124  | 1.927985072  | 5.363536358 | C        | 0.688645065  | 4.570507050  | 4.455729961  |
| C        | 4.518718243  | 1.532675505  | 6.054747105 | O        | 1.769475460  | 4.131087303  | 4.079079151  |
| H        | 5.416659832  | -0.083173610 | 7.176235676 | C        | 0.366747051  | 6.059205055  | 4.437094212  |
| H        | 3.252838373  | 2.921575069  | 4.947531700 | H        | 0.474637181  | 6.454195976  | 5.452873230  |



|             |              |              |             |             |              |              |              |
|-------------|--------------|--------------|-------------|-------------|--------------|--------------|--------------|
| H           | -0.663416088 | 6.234983444  | 4.118486881 | H           | 5.606891155  | 0.497793317  | 6.864958763  |
| H           | 1.065936804  | 6.574484825  | 3.776837111 | H           | 3.345690966  | 2.675855637  | 3.902729273  |
| =====       |              |              |             |             |              |              |              |
| DG of A7-TS |              |              |             |             |              |              |              |
| =====       |              |              |             |             |              |              |              |
| C           | -2.340305567 | 1.348458767  | 5.317164898 | H           | -4.100543022 | 2.476241112  | 5.188184261  |
| C           | -2.290280104 | -0.146181583 | 5.388811111 | H           | -3.853742123 | 1.383310795  | 3.799547911  |
| C           | -0.973711014 | -0.703738153 | 5.943057060 | C           | -2.680699110 | 3.226228714  | 3.736930847  |
| O           | -0.895380318 | -1.369969249 | 6.947628975 | H           | -3.409472942 | 3.771929741  | 3.128543615  |
| N           | 0.165532663  | -0.337191522 | 5.167659760 | H           | -2.230509758 | 3.920340300  | 4.451608658  |
| C           | 1.434020758  | -1.080704331 | 5.406471729 | C           | -1.579634428 | 2.565206528  | 2.901648521  |
| H           | 1.332446337  | -1.526552200 | 6.398359299 | H           | -2.016229153 | 2.109035492  | 1.999670386  |
| C           | 1.600737929  | -2.252139091 | 4.372354031 | H           | -0.818427801 | 3.294510126  | 2.597060442  |
| C           | 1.790992260  | -1.723391771 | 2.937767267 | O           | -0.974321425 | 1.534590602  | 3.651282787  |
| H           | 1.886886597  | -2.566583157 | 2.245053053 | H           | -0.056689292 | -0.245235920 | 4.175175190  |
| H           | 0.943200052  | -1.118222952 | 2.595396280 | H           | -2.010679722 | 1.846936822  | 6.231816292  |
| H           | 2.685639620  | -1.103106618 | 2.851083755 | =====       |              |              |              |
| C           | 2.831774950  | -3.091442347 | 4.770133495 | MF of A7-TS |              |              |              |
| H           | 2.922643423  | -3.956716299 | 4.105384827 | =====       |              |              |              |
| H           | 3.757805824  | -2.515359640 | 4.697599411 | Pd          | 0.169411793  | 1.892289639  | 5.303278923  |
| H           | 2.743061543  | -3.468090534 | 5.795874119 | O           | 1.156883717  | 1.948812127  | 7.066642761  |
| C           | 0.356747091  | -3.162407875 | 4.425655365 | C           | 0.369044095  | 1.809748888  | 8.098751068  |
| H           | 0.149969980  | -3.498614788 | 5.446154594 | O           | -0.857961595 | 1.669922829  | 8.054452896  |
| H           | -0.539485276 | -2.655048609 | 4.051615715 | C           | 1.125179887  | 1.838995218  | 9.418681145  |
| H           | 0.510473371  | -4.043806076 | 3.794773102 | H           | 1.450142622  | 2.864558220  | 9.622675896  |
| C           | 2.604966402  | -0.114842154 | 5.415998459 | H           | 2.021668673  | 1.216655612  | 9.354005814  |
| C           | 3.699116230  | -0.306665480 | 6.261374474 | H           | 0.477921963  | 1.495635629  | 10.226613045 |
| N           | 2.514740705  | 0.923491240  | 4.576952457 | O           | -0.032202262 | 3.911193371  | 5.379256248  |
| C           | 4.741527557  | 0.617491663  | 6.218870163 | C           | 0.740564585  | 4.564840794  | 4.545978069  |
| H           | 3.728618622  | -1.155382156 | 6.937580109 | O           | 1.464103818  | 4.060463905  | 3.688109636  |
| C           | 3.506185293  | 1.823529601  | 4.555791855 | C           | 0.662408471  | 6.073802948  | 4.744875908  |
| C           | 4.644735813  | 1.705740929  | 5.352827549 |             |              |              |              |

|          |              |              |             |          |              |              |             |
|----------|--------------|--------------|-------------|----------|--------------|--------------|-------------|
| H        | 1.180289268  | 6.338318348  | 5.672589779 | C        | 4.146627426  | 1.647502780  | 6.979259968 |
| H        | -0.376224279 | 6.399799347  | 4.844866753 | H        | 4.916510105  | -0.062250905 | 8.052008629 |
| H        | 1.142194748  | 6.580231190  | 3.905877590 | H        | 3.041829586  | 3.123425484  | 5.811354637 |
| =====    |              |              |             | H        | 4.924361706  | 2.333846092  | 7.298436165 |
| DG of B7 |              |              |             | H        | -2.894485474 | 0.319433033  | 6.922387600 |
| =====    |              |              |             | H        | -3.508051395 | 0.091764227  | 5.281999588 |
| C        | -2.359063148 | 1.893539429  | 5.524950504 | H        | -2.641595125 | 2.130021811  | 4.503919601 |
| C        | -2.644064188 | 0.430946469  | 5.859982014 | C        | -2.874444485 | 2.911640167  | 6.518133640 |
| C        | -1.549705863 | -0.590525925 | 5.596333504 | H        | -3.967856884 | 2.765378475  | 6.540647984 |
| O        | -1.731233716 | -1.770971060 | 5.463703156 | H        | -2.699059963 | 3.913437128  | 6.118251801 |
| N        | -0.215327337 | -0.008259121 | 5.710235119 | C        | -2.328644276 | 2.821677685  | 7.951228619 |
| C        | 1.024040699  | -0.852984965 | 5.521387577 | H        | -2.833987236 | 3.571220160  | 8.573091507 |
| H        | 0.865802348  | -1.739779830 | 6.145720005 | H        | -2.552029371 | 1.842599988  | 8.394639015 |
| C        | 1.408965945  | -1.387033820 | 4.084675789 | C        | -0.814411223 | 3.049517393  | 8.000218391 |
| C        | 1.994619370  | -0.292918056 | 3.168680191 | H        | -0.581188202 | 4.064434052  | 7.644437313 |
| H        | 2.145102262  | -0.714377463 | 2.168548107 | H        | -0.468626112 | 2.977747679  | 9.043572426 |
| H        | 1.345797181  | 0.576916218  | 3.083458185 | O        | -0.093204275 | 2.085918665  | 7.278419971 |
| H        | 2.966329098  | 0.059335846  | 3.525334597 | H        | -0.181670099 | 0.325896144  | 6.696766376 |
| C        | 2.506012440  | -2.456581116 | 4.311582088 | =====    |              |              |             |
| H        | 2.805799961  | -2.874432325 | 3.345292568 | MF of B7 |              |              |             |
| H        | 3.402956247  | -2.041671991 | 4.780584812 | =====    |              |              |             |
| H        | 2.141981602  | -3.285182476 | 4.930972099 | Pd       | -0.274936020 | 2.082752228  | 5.276018620 |
| C        | 0.235625699  | -2.085224152 | 3.371746778 | O        | -0.323448867 | 2.070064545  | 3.224555731 |
| H        | -0.170155451 | -2.900745153 | 3.973577738 | C        | -1.102117777 | 1.260589242  | 2.564043283 |
| H        | -0.577653289 | -1.398990989 | 3.138691664 | O        | -1.876623392 | 0.433943063  | 3.059050560 |
| H        | 0.603875339  | -2.506201506 | 2.428906441 | C        | -0.945621908 | 1.400430441  | 1.057056189 |
| C        | 2.143018246  | -0.000967022 | 6.102022171 | H        | 0.044982649  | 1.032797694  | 0.769965589 |
| C        | 3.118151188  | -0.522531569 | 6.952069283 | H        | -1.001942158 | 2.452237368  | 0.764785945 |
| N        | 2.141193867  | 1.288661599  | 5.722744465 | H        | -1.714298129 | 0.818235397  | 0.547374785 |
| C        | 4.140880108  | 0.317767620  | 7.392975330 | O        | -0.560334682 | 4.077784061  | 5.135666847 |
| H        | 3.076455355  | -1.563957334 | 7.254367352 | C        | 0.509410560  | 4.757473469  | 4.782209396 |
| C        | 3.116565228  | 2.095971584  | 6.150791645 | O        | 1.632804990  | 4.288756847  | 4.643684864 |















|         |         |         |         |         |         |         |         |         |         |         |         |
|---------|---------|---------|---------|---------|---------|---------|---------|---------|---------|---------|---------|
| 1523.60 | 1529.28 | 1545.44 | 1558.13 | 1615.08 | 1625.27 | 1490.14 | 1492.56 | 1507.35 | 1508.08 | 1514.02 | 1519.55 |
| 1660.33 | 1744.77 | 1768.80 | 2479.16 | 3000.19 | 3036.54 | 1524.21 | 1524.97 | 1530.36 | 1543.11 | 1628.30 | 1651.60 |
| 3038.87 | 3039.72 | 3046.67 | 3048.04 | 3052.70 | 3060.70 | 1657.43 | 1743.85 | 1761.55 | 2991.09 | 3033.79 | 3034.85 |
| 3061.46 | 3061.52 | 3069.65 | 3086.14 | 3099.73 | 3101.29 | 3040.38 | 3042.24 | 3044.27 | 3046.18 | 3049.07 | 3059.46 |
| 3104.76 | 3113.94 | 3120.15 | 3122.87 | 3131.02 | 3132.95 | 3062.31 | 3069.37 | 3080.87 | 3092.00 | 3095.68 | 3101.10 |
| 3134.61 | 3146.59 | 3158.21 | 3169.74 | 3169.92 | 3191.33 | 3105.29 | 3120.20 | 3122.25 | 3130.82 | 3131.13 | 3133.67 |
| 3205.96 | 3220.91 | 3231.80 |         |         |         | 3135.29 | 3145.70 | 3148.03 | 3165.84 | 3170.65 | 3191.00 |
| =====   |         |         |         |         |         | 3215.39 | 3220.52 | 3236.71 |         |         |         |

A6'

|         |         |         |         |         |         |
|---------|---------|---------|---------|---------|---------|
| 37.34   | 44.76   | 51.22   | 57.00   | 63.26   | 70.11   |
| 74.17   | 85.02   | 97.00   | 102.45  | 113.85  | 115.12  |
| 127.93  | 137.72  | 143.18  | 154.87  | 168.53  | 174.89  |
| 182.67  | 189.05  | 206.43  | 213.29  | 237.66  | 254.60  |
| 264.11  | 271.12  | 275.77  | 284.10  | 297.77  | 305.52  |
| 314.38  | 318.37  | 321.41  | 330.29  | 338.95  | 354.32  |
| 368.42  | 370.53  | 406.66  | 419.77  | 433.98  | 441.83  |
| 460.51  | 483.25  | 496.20  | 522.58  | 529.76  | 534.34  |
| 558.44  | 562.00  | 604.87  | 615.08  | 633.77  | 652.77  |
| 674.38  | 689.85  | 690.36  | 739.43  | 745.83  | 774.42  |
| 808.62  | 821.66  | 866.39  | 868.54  | 892.00  | 901.75  |
| 914.09  | 926.92  | 931.63  | 934.75  | 951.87  | 952.59  |
| 976.40  | 981.49  | 984.13  | 993.90  | 998.55  | 1012.12 |
| 1019.69 | 1028.70 | 1036.86 | 1053.41 | 1056.33 | 1059.55 |
| 1065.38 | 1069.52 | 1074.74 | 1079.79 | 1085.98 | 1098.49 |
| 1122.28 | 1139.53 | 1143.03 | 1192.46 | 1195.47 | 1210.86 |
| 1237.43 | 1249.44 | 1251.89 | 1255.36 | 1259.52 | 1291.51 |
| 1297.68 | 1307.19 | 1313.70 | 1328.11 | 1345.82 | 1350.06 |
| 1358.72 | 1366.14 | 1376.64 | 1388.84 | 1396.76 | 1408.84 |
| 1414.55 | 1419.02 | 1423.00 | 1426.56 | 1452.63 | 1467.33 |
| 1474.81 | 1477.72 | 1479.09 | 1481.76 | 1486.52 | 1488.63 |

B4

|         |         |         |         |         |         |
|---------|---------|---------|---------|---------|---------|
| 26.48   | 35.06   | 49.57   | 54.72   | 59.75   | 75.22   |
| 90.45   | 98.26   | 106.43  | 118.40  | 127.85  | 128.82  |
| 139.59  | 156.23  | 171.37  | 178.66  | 203.44  | 218.62  |
| 226.47  | 241.47  | 251.08  | 256.37  | 267.51  | 275.40  |
| 283.54  | 295.83  | 310.18  | 315.77  | 322.55  | 339.77  |
| 353.13  | 364.70  | 403.72  | 409.39  | 414.23  | 431.16  |
| 454.80  | 466.01  | 474.49  | 490.42  | 530.31  | 556.29  |
| 572.89  | 605.63  | 632.45  | 642.80  | 663.43  | 678.43  |
| 736.60  | 742.08  | 775.95  | 781.34  | 804.90  | 810.24  |
| 869.02  | 871.78  | 895.96  | 905.81  | 918.40  | 921.73  |
| 947.64  | 951.74  | 976.56  | 980.55  | 992.00  | 1008.20 |
| 1013.37 | 1028.35 | 1031.71 | 1035.16 | 1050.01 | 1055.62 |
| 1057.98 | 1062.58 | 1077.86 | 1080.40 | 1088.38 | 1093.64 |
| 1118.02 | 1142.02 | 1144.52 | 1192.50 | 1203.44 | 1211.39 |
| 1217.23 | 1236.42 | 1247.51 | 1255.21 | 1259.60 | 1282.38 |
| 1290.32 | 1297.05 | 1312.62 | 1321.12 | 1324.32 | 1328.51 |
| 1351.13 | 1357.67 | 1366.29 | 1396.50 | 1404.03 | 1411.43 |
| 1416.53 | 1419.61 | 1441.56 | 1449.54 | 1462.32 | 1474.07 |
| 1477.16 | 1488.32 | 1489.77 | 1500.60 | 1503.56 | 1506.95 |
| 1507.85 | 1514.71 | 1519.85 | 1525.41 | 1529.47 | 1538.83 |

1544.20 1621.44 1656.11 1731.54 1740.31 2969.28  
2973.95 3012.79 3018.00 3022.80 3030.71 3032.13  
3035.62 3036.77 3039.61 3046.59 3058.33 3066.46  
3100.03 3103.70 3110.70 3118.13 3122.53 3130.74  
3133.24 3145.11 3180.26 3185.92 3194.04 3215.80  
3222.57 3342.19 3820.31

=====

B5

=====

21.06 51.22 55.21 58.55 73.70 95.65  
101.26 119.32 136.50 147.56 193.19 224.72  
243.14 244.06 256.31 259.58 270.30 290.43  
306.61 307.73 311.32 323.66 349.24 389.28  
390.15 404.73 408.07 426.44 433.56 473.55  
486.47 518.63 550.87 557.24 574.26 633.86  
650.26 677.95 732.58 742.13 775.41 810.34  
811.60 856.19 867.67 898.25 903.62 917.98  
921.22 948.83 952.15 969.49 974.93 977.66  
1003.52 1010.85 1012.83 1028.27 1036.83 1056.72  
1062.62 1078.74 1081.75 1099.98 1106.88 1124.68  
1148.52 1173.03 1192.93 1212.96 1221.73 1236.49  
1249.34 1256.39 1261.71 1283.75 1297.77 1305.48  
1320.28 1325.31 1353.25 1361.44 1362.68 1371.82  
1396.33 1402.38 1415.50 1418.86 1431.67 1448.61  
1476.06 1478.41 1484.06 1489.69 1493.78 1501.35  
1507.04 1513.88 1518.64 1519.05 1525.71 1539.14  
1620.92 1655.48 1728.00 2994.10 3018.26 3025.18  
3029.09 3031.57 3032.07 3034.78 3038.86 3044.98  
3045.11 3061.95 3074.69 3089.49 3097.40 3100.18  
3110.25 3118.22 3121.78 3142.57 3183.11 3192.25  
3214.70 3222.70 3853.60

=====

B6

=====

41.09 43.74 47.29 52.01 55.50 66.38  
69.30 83.04 86.40 104.98 108.02 114.41  
124.97 129.61 152.00 160.38 165.87 176.67  
186.97 203.26 214.51 228.80 230.80 252.55  
263.57 280.08 282.28 291.03 296.13 300.14  
305.81 319.55 321.01 324.45 330.19 358.95  
373.02 396.43 406.38 417.49 440.11 453.84  
463.80 488.45 518.79 534.40 541.57 546.88  
560.88 589.03 609.42 611.04 642.22 652.91  
674.14 689.17 700.93 738.82 754.28 775.70  
801.98 809.31 863.72 874.04 891.11 908.11  
914.27 916.34 930.44 939.84 951.07 951.21  
976.97 978.80 981.37 992.36 1011.89 1015.87  
1017.14 1029.74 1041.45 1051.73 1060.53 1063.21  
1065.79 1068.95 1072.44 1081.74 1109.18 1114.39  
1126.23 1140.14 1176.87 1191.80 1207.80 1215.95  
1235.63 1243.61 1248.03 1255.49 1257.06 1284.87  
1300.56 1306.76 1310.40 1326.41 1343.57 1355.73  
1367.71 1373.44 1380.59 1388.97 1396.67 1409.47  
1419.40 1421.67 1424.02 1448.27 1454.15 1470.75  
1476.18 1479.04 1481.48 1484.48 1486.95 1488.66  
1489.84 1503.64 1506.11 1507.75 1517.11 1519.57  
1524.34 1530.58 1542.58 1590.29 1617.55 1628.98  
1654.94 1737.21 1757.51 2508.21 2999.48 3028.02  
3033.29 3040.39 3044.00 3049.93 3053.67 3056.99  
3059.90 3060.25 3078.51 3082.32 3101.15 3102.37  
3107.42 3112.25 3120.37 3122.78 3133.36 3134.05  
3146.64 3152.19 3154.77 3166.95 3170.43 3190.85

3214.41 3219.94 3248.61

3136.03 3138.42 3149.34 3156.70 3168.03 3190.10

=====

3195.59 3218.77 3234.83

B6'

=====

=====

A6-TS

=====

28.21 44.64 52.32 53.55 66.44 74.39

83.37 85.93 89.35 97.97 101.43 110.25

125.45 139.10 149.93 152.66 163.05 185.65

188.31 202.26 212.82 223.03 239.88 255.59

266.88 271.21 277.28 286.52 295.35 308.49

310.61 316.32 320.14 337.44 346.36 360.25

393.83 405.98 410.91 424.22 427.63 433.77

473.97 495.30 513.67 537.83 550.18 551.11

552.35 573.78 604.15 615.14 631.99 655.44

674.49 677.27 697.15 721.15 742.51 772.95

804.05 813.84 857.36 864.70 897.49 911.11

914.69 925.04 933.75 936.01 951.84 954.79

973.21 980.83 988.28 991.00 1013.89 1024.66

1028.15 1035.22 1045.48 1056.16 1059.21 1064.88

1068.20 1070.74 1078.59 1088.23 1111.27 1117.45

1132.29 1140.96 1163.51 1195.62 1203.60 1211.00

1238.44 1245.25 1254.57 1256.59 1273.95 1286.67

1294.19 1304.01 1317.29 1327.37 1340.16 1346.57

1372.14 1378.68 1382.90 1386.83 1395.31 1411.89

1416.75 1418.50 1420.79 1424.80 1452.58 1465.94

1477.31 1478.02 1481.78 1488.46 1489.22 1491.74

1492.38 1496.51 1508.29 1515.08 1516.99 1519.92

1523.83 1530.63 1533.34 1547.41 1623.21 1641.37

1660.68 1744.66 1768.43 2648.68 3007.64 3009.84

3016.93 3023.42 3039.57 3041.38 3046.72 3049.88

3055.12 3057.47 3062.29 3065.03 3084.39 3089.21

3097.85 3102.40 3110.22 3121.40 3128.23 3130.37

-1315.52 31.83 37.06 46.70 53.92 63.23

77.83 84.38 89.07 90.15 100.63 104.62

110.03 116.39 118.77 125.55 140.28 166.00

171.86 179.21 200.23 211.78 219.26 230.62

243.84 258.23 267.03 270.69 285.69 294.07

307.73 314.99 320.30 325.87 331.25 345.06

367.25 388.59 407.83 421.51 432.51 442.41

454.78 490.30 508.40 520.22 536.12 550.84

555.61 568.11 607.50 610.02 622.45 639.47

647.98 678.28 682.31 695.05 721.85 753.55

779.78 812.98 818.80 852.09 886.59 908.08

919.89 924.23 934.92 937.45 939.68 950.29

951.47 961.66 982.84 989.00 1007.64 1011.60

1024.42 1025.01 1028.66 1029.03 1043.35 1061.19

1062.25 1064.13 1067.46 1073.30 1082.55 1091.36

1111.46 1137.17 1138.96 1192.83 1198.59 1206.60

1218.58 1239.09 1244.64 1256.80 1258.01 1261.68

1294.75 1307.98 1314.60 1318.46 1325.94 1328.78

1332.29 1349.23 1383.77 1389.70 1391.87 1396.63

1403.32 1418.88 1421.51 1426.41 1456.00 1470.63

1475.62 1480.17 1481.44 1483.10 1488.92 1489.38

1495.81 1499.55 1502.92 1506.24 1509.38 1515.13

1516.29 1529.10 1532.49 1543.21 1626.92 1653.26

1729.86 1739.21 1750.05 1817.35 3008.60 3014.40

3038.44 3042.58 3045.98 3048.05 3054.32 3055.24

3058.58 3060.57 3082.26 3102.50 3107.33 3107.52

|         |         |         |         |         |         |         |         |         |         |         |         |
|---------|---------|---------|---------|---------|---------|---------|---------|---------|---------|---------|---------|
| 3110.95 | 3125.54 | 3126.37 | 3127.55 | 3128.48 | 3133.48 | 3058.72 | 3060.45 | 3102.61 | 3107.59 | 3116.31 | 3117.38 |
| 3136.32 | 3151.30 | 3159.88 | 3161.35 | 3166.58 | 3190.06 | 3119.53 | 3126.88 | 3129.39 | 3130.13 | 3131.19 | 3131.25 |
| 3211.52 | 3223.45 | 3228.62 |         |         |         | 3133.45 | 3151.99 | 3165.23 | 3165.61 | 3189.11 | 3209.89 |

=====

A7

=====

|         |         |         |         |         |         |
|---------|---------|---------|---------|---------|---------|
| 31.33   | 38.58   | 42.95   | 50.91   | 60.27   | 69.24   |
| 77.68   | 81.75   | 87.47   | 99.85   | 106.89  | 111.30  |
| 113.03  | 121.11  | 127.75  | 142.48  | 160.91  | 163.21  |
| 181.07  | 191.61  | 205.06  | 208.70  | 232.14  | 242.33  |
| 248.36  | 253.76  | 272.48  | 278.74  | 281.10  | 290.81  |
| 304.01  | 311.52  | 316.56  | 330.82  | 347.90  | 365.86  |
| 374.70  | 407.28  | 415.47  | 421.27  | 433.79  | 459.13  |
| 487.51  | 508.68  | 522.76  | 523.94  | 547.64  | 560.00  |
| 571.35  | 602.99  | 614.65  | 620.79  | 633.15  | 645.99  |
| 674.74  | 681.99  | 690.43  | 711.77  | 749.27  | 779.70  |
| 804.95  | 815.02  | 820.05  | 875.75  | 887.61  | 903.70  |
| 917.12  | 927.08  | 935.01  | 939.15  | 942.12  | 950.99  |
| 954.89  | 965.74  | 986.20  | 1001.61 | 1007.18 | 1023.38 |
| 1025.20 | 1031.26 | 1032.57 | 1033.12 | 1043.98 | 1059.71 |
| 1064.46 | 1069.91 | 1071.76 | 1076.53 | 1082.12 | 1088.96 |
| 1108.59 | 1135.88 | 1137.34 | 1164.65 | 1192.26 | 1207.87 |
| 1221.49 | 1233.31 | 1244.56 | 1259.50 | 1261.90 | 1266.07 |
| 1282.91 | 1309.14 | 1319.93 | 1324.76 | 1330.89 | 1332.39 |
| 1345.41 | 1356.21 | 1377.41 | 1387.04 | 1392.11 | 1399.17 |
| 1401.55 | 1415.73 | 1422.09 | 1433.13 | 1453.63 | 1460.07 |
| 1464.98 | 1476.91 | 1479.73 | 1481.27 | 1481.39 | 1489.29 |
| 1490.00 | 1497.10 | 1498.95 | 1504.49 | 1509.08 | 1512.84 |
| 1517.86 | 1529.76 | 1531.85 | 1541.67 | 1628.42 | 1652.17 |
| 1701.74 | 1747.93 | 1865.94 | 2982.66 | 2998.55 | 3027.21 |
| 3037.38 | 3040.26 | 3045.69 | 3053.67 | 3055.11 | 3057.98 |

3218.05 3231.32 3307.60

=====

A7-TS

=====

|         |         |         |         |         |         |
|---------|---------|---------|---------|---------|---------|
| -298.11 | 21.01   | 32.94   | 39.89   | 44.85   | 52.33   |
| 55.87   | 58.51   | 65.21   | 71.12   | 72.54   | 84.25   |
| 92.91   | 101.64  | 110.28  | 123.56  | 131.54  | 132.20  |
| 156.33  | 160.04  | 174.21  | 185.94  | 207.27  | 211.47  |
| 238.69  | 240.04  | 258.09  | 270.21  | 281.69  | 287.99  |
| 291.81  | 301.25  | 303.34  | 316.84  | 327.90  | 344.27  |
| 363.28  | 378.71  | 408.93  | 419.56  | 425.62  | 438.30  |
| 460.29  | 464.16  | 503.01  | 517.08  | 526.03  | 557.03  |
| 565.09  | 582.07  | 608.83  | 612.94  | 627.92  | 643.34  |
| 672.89  | 683.66  | 696.98  | 737.32  | 750.21  | 770.60  |
| 812.65  | 847.46  | 868.78  | 877.30  | 901.55  | 905.03  |
| 910.57  | 930.39  | 933.94  | 937.70  | 940.48  | 945.94  |
| 948.96  | 953.35  | 979.78  | 990.06  | 993.42  | 1007.85 |
| 1009.99 | 1014.25 | 1022.60 | 1025.25 | 1027.98 | 1045.91 |
| 1060.18 | 1062.88 | 1063.19 | 1074.19 | 1078.02 | 1088.70 |
| 1110.34 | 1133.78 | 1148.81 | 1163.04 | 1188.52 | 1196.33 |
| 1212.81 | 1225.09 | 1244.77 | 1255.02 | 1257.85 | 1261.92 |
| 1276.11 | 1300.04 | 1315.16 | 1328.61 | 1331.46 | 1341.71 |
| 1348.06 | 1350.27 | 1370.50 | 1385.18 | 1393.99 | 1395.08 |
| 1398.94 | 1423.02 | 1428.36 | 1432.61 | 1445.15 | 1459.66 |
| 1475.15 | 1480.92 | 1481.47 | 1482.36 | 1489.45 | 1489.78 |
| 1492.85 | 1494.08 | 1499.29 | 1508.25 | 1509.41 | 1519.43 |
| 1523.66 | 1525.76 | 1527.91 | 1538.43 | 1633.04 | 1647.42 |
| 1704.79 | 1725.15 | 1839.70 | 2995.44 | 3019.38 | 3038.37 |

|         |         |         |         |         |         |         |         |         |         |         |         |
|---------|---------|---------|---------|---------|---------|---------|---------|---------|---------|---------|---------|
| 3038.85 | 3043.43 | 3045.23 | 3056.96 | 3057.67 | 3067.35 | 1708.96 | 1736.17 | 1791.17 | 3033.29 | 3041.97 | 3044.32 |
| 3074.18 | 3080.01 | 3098.72 | 3099.24 | 3104.93 | 3108.81 | 3047.20 | 3050.29 | 3053.12 | 3056.24 | 3057.53 | 3060.17 |
| 3113.28 | 3115.77 | 3127.18 | 3128.08 | 3128.13 | 3131.54 | 3084.44 | 3095.31 | 3107.50 | 3114.21 | 3116.25 | 3123.23 |
| 3134.66 | 3142.67 | 3161.55 | 3166.04 | 3183.57 | 3199.80 | 3124.84 | 3127.00 | 3127.05 | 3128.27 | 3130.68 | 3142.43 |
| 3206.93 | 3219.28 | 3474.06 |         |         |         | 3147.12 | 3161.19 | 3164.36 | 3170.16 | 3197.13 | 3223.64 |
|         |         |         |         |         |         |         | 3254.12 | 3278.33 | 3622.77 |         |         |

A8

---

|         |         |         |         |         |         |
|---------|---------|---------|---------|---------|---------|
| 23.78   | 32.71   | 34.45   | 44.51   | 49.61   | 55.67   |
| 63.56   | 74.78   | 76.23   | 78.36   | 87.99   | 97.09   |
| 100.73  | 115.02  | 124.27  | 137.96  | 152.23  | 159.96  |
| 167.58  | 180.95  | 187.40  | 192.81  | 193.62  | 216.22  |
| 224.57  | 233.15  | 239.55  | 254.26  | 268.16  | 288.70  |
| 296.12  | 301.01  | 310.27  | 320.33  | 332.15  | 337.14  |
| 347.12  | 380.27  | 409.88  | 423.12  | 457.36  | 462.34  |
| 484.02  | 516.46  | 527.24  | 534.42  | 549.24  | 569.87  |
| 574.52  | 607.34  | 611.19  | 646.56  | 651.57  | 664.97  |
| 680.78  | 687.88  | 703.67  | 752.81  | 776.66  | 780.69  |
| 787.94  | 818.76  | 846.80  | 877.29  | 899.58  | 900.43  |
| 927.47  | 930.45  | 934.02  | 935.67  | 944.59  | 953.29  |
| 958.04  | 967.72  | 972.09  | 978.04  | 993.90  | 1015.10 |
| 1023.09 | 1027.00 | 1034.07 | 1044.47 | 1047.68 | 1055.65 |
| 1060.09 | 1061.40 | 1063.38 | 1075.12 | 1094.06 | 1109.98 |
| 1135.86 | 1139.41 | 1181.85 | 1198.81 | 1211.52 | 1217.60 |
| 1221.61 | 1231.66 | 1248.81 | 1270.82 | 1279.27 | 1283.11 |
| 1304.89 | 1310.89 | 1321.63 | 1325.12 | 1338.20 | 1346.84 |
| 1355.80 | 1366.34 | 1386.00 | 1390.95 | 1400.01 | 1402.33 |
| 1407.59 | 1417.27 | 1422.26 | 1426.04 | 1459.55 | 1478.52 |
| 1481.25 | 1481.81 | 1486.13 | 1488.87 | 1489.00 | 1490.79 |
| 1499.92 | 1502.43 | 1503.34 | 1503.64 | 1513.48 | 1520.56 |
| 1523.63 | 1527.34 | 1529.30 | 1535.18 | 1628.26 | 1657.10 |

A6-TS'

---

|         |         |         |         |         |         |
|---------|---------|---------|---------|---------|---------|
| -210.66 | 8.10    | 37.38   | 52.26   | 56.13   | 56.29   |
| 60.36   | 69.03   | 78.85   | 82.09   | 85.36   | 94.51   |
| 106.76  | 117.22  | 129.05  | 129.26  | 141.46  | 153.33  |
| 170.75  | 184.12  | 204.59  | 212.09  | 233.59  | 236.73  |
| 257.74  | 261.76  | 272.39  | 278.02  | 297.99  | 301.72  |
| 313.89  | 318.71  | 322.23  | 342.67  | 357.89  | 374.20  |
| 379.83  | 406.83  | 421.30  | 429.73  | 430.53  | 436.84  |
| 464.07  | 487.57  | 503.36  | 521.84  | 550.53  | 553.16  |
| 556.73  | 584.13  | 601.73  | 607.92  | 628.27  | 637.04  |
| 655.79  | 675.33  | 684.33  | 729.39  | 741.67  | 747.29  |
| 773.44  | 804.89  | 810.05  | 856.64  | 888.72  | 899.34  |
| 912.12  | 918.55  | 935.32  | 946.17  | 949.93  | 953.22  |
| 953.98  | 963.60  | 971.39  | 980.64  | 995.54  | 1014.72 |
| 1025.36 | 1025.94 | 1033.49 | 1047.07 | 1053.59 | 1060.60 |
| 1064.92 | 1070.07 | 1070.49 | 1074.22 | 1080.57 | 1103.99 |
| 1108.23 | 1138.02 | 1141.53 | 1195.58 | 1202.55 | 1205.41 |
| 1238.94 | 1240.92 | 1255.77 | 1256.02 | 1258.38 | 1297.53 |
| 1301.19 | 1302.99 | 1319.10 | 1326.77 | 1326.86 | 1341.51 |
| 1349.38 | 1377.68 | 1387.72 | 1390.14 | 1391.54 | 1405.37 |
| 1416.12 | 1419.66 | 1422.03 | 1423.21 | 1451.92 | 1472.73 |
| 1474.16 | 1474.88 | 1478.68 | 1480.60 | 1482.39 | 1488.94 |
| 1491.01 | 1496.24 | 1501.34 | 1507.23 | 1511.56 | 1514.51 |

1520.10 1523.20 1530.01 1545.39 1622.19 1656.51  
1660.39 1735.47 1749.16 1764.78 2998.47 3013.74  
3032.73 3036.33 3039.98 3045.93 3052.01 3056.64  
3057.67 3059.27 3064.56 3074.80 3089.71 3095.83  
3102.23 3112.71 3118.04 3118.69 3127.97 3130.18  
3134.72 3143.67 3155.61 3165.77 3174.08 3185.76  
3191.63 3213.94 3225.53

=====

1491.48 1495.72 1496.20 1505.81 1512.99 1515.60  
1519.50 1522.64 1529.81 1545.81 1624.14 1660.59  
1685.04 1740.09 1748.14 1763.99 3000.97 3001.76  
3034.78 3035.79 3037.82 3046.71 3048.18 3054.84  
3058.03 3058.98 3062.02 3069.50 3086.65 3096.65  
3102.99 3119.13 3120.32 3122.15 3130.92 3132.27  
3136.27 3143.40 3155.05 3167.99 3179.46 3187.28  
3194.23 3218.04 3233.80

=====

A7'

=====

A7'-TS

=====

24.52 35.99 49.50 51.28 56.66 60.73  
67.33 74.07 80.72 85.96 93.52 104.50  
113.09 126.32 128.03 135.31 140.83 154.22  
170.46 184.01 212.15 226.04 232.57 236.27  
257.93 260.61 275.00 279.63 300.17 311.77  
315.01 322.86 327.14 342.78 366.65 378.87  
383.78 405.84 411.86 424.45 431.04 436.55  
463.83 484.89 499.01 522.80 540.06 549.83  
554.89 583.58 606.20 607.61 632.39 653.83  
659.35 675.82 681.87 726.32 745.94 770.39  
805.15 808.57 855.96 886.37 897.11 909.47  
916.41 934.56 936.30 947.69 952.32 953.99  
962.46 968.53 979.76 992.03 1009.46 1012.26  
1026.09 1028.50 1032.91 1052.06 1053.39 1059.44  
1065.27 1069.73 1070.77 1079.00 1085.77 1103.64  
1133.94 1140.53 1151.38 1195.15 1202.57 1203.76  
1239.24 1240.22 1253.44 1255.23 1257.55 1297.69  
1299.66 1305.69 1318.30 1325.21 1327.41 1341.14  
1348.01 1374.90 1385.20 1387.02 1388.50 1395.82  
1415.63 1421.63 1422.47 1424.49 1451.95 1468.93  
1474.30 1475.39 1478.19 1480.44 1482.84 1489.36

-141.63 6.24 30.30 38.89 54.81 64.60  
70.89 77.13 85.54 93.20 101.32 107.30  
114.12 115.68 117.24 123.53 131.46 147.76  
156.78 164.27 181.23 197.05 206.10 219.89  
235.34 241.96 256.64 267.69 272.58 285.18  
296.74 313.37 316.15 320.70 330.87 337.85  
365.44 396.96 407.60 424.07 429.64 432.48  
465.18 472.95 492.38 508.01 515.77 541.65  
558.52 568.84 593.17 604.43 632.47 653.14  
656.45 678.22 690.80 719.57 748.82 771.50  
802.18 816.18 829.62 851.67 891.95 896.96  
915.40 916.44 923.78 927.39 940.71 945.94  
954.53 969.72 972.65 977.17 998.16 1009.29  
1015.31 1030.95 1036.62 1039.49 1046.43 1054.70  
1060.02 1064.02 1070.58 1075.55 1087.53 1120.00  
1124.15 1132.33 1137.23 1180.62 1185.56 1189.96  
1206.67 1240.37 1241.39 1249.09 1257.17 1265.84  
1281.83 1295.47 1298.28 1312.66 1326.85 1338.70  
1364.67 1367.55 1380.49 1387.67 1398.57 1401.25  
1416.12 1420.49 1435.83 1438.07 1449.57 1456.07

1473.88 1474.75 1479.03 1482.52 1483.79 1486.34  
1493.80 1493.96 1494.90 1502.95 1512.25 1515.92  
1520.43 1525.13 1541.61 1562.88 1626.46 1646.39  
1709.83 1741.62 1782.24 2448.16 2976.33 2978.77  
3021.78 3033.94 3044.22 3048.45 3050.67 3056.63  
3061.18 3064.67 3071.91 3087.20 3103.37 3106.16  
3108.19 3114.15 3123.22 3127.47 3131.37 3148.26  
3150.89 3153.51 3169.33 3173.41 3186.09 3186.61  
3206.65 3207.65 3213.56

1404.95 1416.23 1421.34 1429.31 1442.52 1459.28  
1477.82 1479.27 1480.89 1481.40 1487.34 1488.13  
1497.03 1503.33 1503.99 1507.48 1512.93 1521.36  
1530.52 1533.63 1538.15 1553.81 1628.96 1652.18  
1688.92 1733.42 1751.79 1810.54 2993.88 3019.11  
3035.50 3036.45 3046.94 3053.98 3057.67 3057.87  
3060.38 3066.72 3067.30 3082.70 3106.90 3108.12  
3108.45 3116.20 3117.06 3123.24 3128.92 3134.79  
3156.52 3165.02 3170.12 3176.21 3188.04 3188.11  
3207.22 3213.36 3230.16

=====

B6-TS

=====

-1256.56 36.74 40.68 50.57 53.67 60.64  
72.03 77.94 82.25 88.79 93.33 111.01  
114.27 122.22 127.97 138.87 151.07 159.71  
171.01 182.07 194.01 210.89 230.00 237.38  
250.94 263.70 280.07 282.95 289.81 299.64  
315.19 325.16 330.52 333.97 343.57 378.81  
392.55 393.64 415.14 427.18 431.45 438.23  
445.50 478.96 518.24 520.19 524.79 538.89  
560.93 564.67 584.29 602.77 610.02 643.07  
655.43 671.95 682.64 687.18 738.82 755.48  
779.64 816.26 818.34 854.57 874.47 895.19  
898.71 919.60 925.25 937.17 939.13 952.57  
955.40 968.32 984.17 985.92 1006.73 1015.35  
1021.97 1022.63 1032.36 1033.60 1042.45 1060.57  
1063.43 1067.95 1070.14 1077.26 1083.02 1092.47  
1125.44 1130.18 1135.56 1190.19 1202.51 1219.18  
1232.94 1239.58 1246.38 1251.52 1261.79 1266.81  
1301.26 1306.72 1318.86 1322.69 1330.72 1333.15  
1351.61 1356.94 1374.30 1382.13 1391.26 1391.76

=====

B7

=====

37.93 45.42 52.09 58.11 63.43 69.64  
72.02 79.35 86.69 93.64 102.70 112.86  
119.75 126.94 143.81 147.27 169.49 179.56  
185.86 195.18 210.25 224.41 231.71 246.81  
253.88 262.75 274.51 284.65 285.38 310.19  
319.94 333.15 335.49 337.98 369.78 381.55  
390.22 397.91 417.46 430.42 437.58 460.24  
475.01 496.09 509.58 523.39 528.21 543.89  
557.93 568.56 602.09 618.41 637.19 645.87  
663.92 684.13 696.04 709.47 753.28 777.76  
814.61 830.18 843.19 864.85 885.04 891.16  
916.45 921.75 938.32 940.48 942.28 949.96  
958.96 977.31 985.74 1003.24 1006.01 1016.89  
1021.72 1023.44 1030.13 1033.47 1059.59 1064.54  
1067.07 1070.85 1074.82 1078.30 1084.10 1115.41  
1128.43 1132.10 1144.77 1187.00 1189.39 1198.91  
1228.61 1237.02 1238.75 1242.95 1260.24 1265.94  
1297.03 1300.32 1309.98 1321.46 1328.90 1351.18

1358.51 1362.07 1377.07 1388.61 1392.78 1399.00  
 1404.17 1411.83 1423.30 1434.34 1443.35 1463.73  
 1472.46 1479.03 1479.92 1481.39 1488.50 1489.70  
 1492.36 1498.51 1499.01 1507.22 1508.56 1511.96  
 1517.90 1527.91 1534.59 1553.09 1630.49 1650.26  
 1699.15 1749.60 1865.21 2986.87 2988.79 3022.84  
 3036.07 3039.00 3047.09 3051.49 3054.51 3057.94  
 3058.88 3061.45 3075.26 3107.55 3114.70 3118.42  
 3119.35 3123.81 3130.02 3131.06 3132.50 3133.89  
 3164.02 3167.71 3180.57 3187.63 3189.99 3199.29  
 3205.10 3212.03 3228.88

=====

B7-TS

=====

-347.21 20.88 35.15 43.67 48.59 58.36  
 65.89 71.83 74.77 81.33 81.79 88.04  
 89.65 101.46 108.25 111.96 120.57 138.92  
 152.04 170.65 185.57 194.28 208.75 211.81  
 248.47 254.00 273.23 279.57 285.78 287.84  
 303.45 312.40 326.97 333.15 341.67 345.06  
 358.50 373.26 399.56 420.49 424.74 432.13  
 458.53 474.40 515.80 526.74 548.36 557.15  
 566.82 580.61 605.29 616.92 637.89 639.10  
 664.85 685.26 700.39 715.26 749.71 776.41  
 815.49 836.57 861.00 878.58 888.35 896.38  
 905.84 911.28 921.22 928.42 937.07 950.40  
 955.84 966.56 982.59 1005.06 1013.33 1017.07  
 1019.34 1022.96 1029.97 1032.81 1040.86 1056.28  
 1059.03 1065.72 1067.85 1069.52 1077.07 1098.71  
 1100.99 1133.79 1147.72 1187.59 1192.20 1204.00  
 1211.01 1230.07 1238.47 1247.51 1259.63 1269.58

1276.16 1300.85 1308.72 1311.57 1330.94 1346.92  
 1350.69 1354.29 1390.76 1394.36 1399.96 1401.30  
 1402.70 1419.94 1429.12 1438.87 1458.96 1465.21  
 1472.16 1472.79 1479.57 1480.11 1481.97 1489.39  
 1489.76 1501.89 1502.32 1506.92 1512.40 1512.89  
 1519.08 1529.98 1533.79 1551.95 1628.95 1646.20  
 1696.47 1739.16 1825.94 3024.61 3028.38 3035.40  
 3043.71 3047.46 3053.04 3053.81 3054.09 3056.51  
 3057.16 3057.39 3090.35 3098.51 3104.14 3104.31  
 3109.08 3113.08 3115.89 3129.91 3130.00 3132.84  
 3162.72 3167.82 3168.34 3172.19 3182.89 3199.52  
 3204.64 3213.78 3375.01

=====

B8

=====

24.59 32.27 39.55 43.03 46.41 59.18  
 59.76 70.63 84.58 87.48 89.30 93.97  
 101.52 115.79 123.05 125.98 137.67 152.12  
 165.15 171.20 196.37 198.52 204.80 225.58  
 234.96 250.10 252.50 264.87 277.67 290.04  
 305.68 308.37 312.79 326.68 335.71 346.60  
 362.03 368.62 416.05 420.15 438.41 457.39  
 478.07 523.07 534.86 549.91 555.15 604.49  
 608.40 613.83 622.19 655.37 665.24 680.86  
 692.85 696.68 711.49 729.16 742.15 776.54  
 806.69 817.56 850.29 863.52 878.71 887.42  
 906.51 924.69 931.47 932.88 943.16 949.74  
 956.97 975.98 981.89 988.07 995.75 1008.52  
 1018.07 1022.66 1025.89 1030.20 1037.32 1059.36  
 1059.58 1060.74 1065.68 1070.82 1095.09 1125.47  
 1141.87 1149.22 1201.36 1204.58 1212.36 1218.69



|         |         |         |         |         |         |         |         |         |         |         |         |
|---------|---------|---------|---------|---------|---------|---------|---------|---------|---------|---------|---------|
| 1228.74 | 1235.88 | 1243.74 | 1257.21 | 1274.27 | 1288.61 | 1122.52 | 1138.98 | 1141.46 | 1190.17 | 1201.21 | 1208.88 |
| 1296.05 | 1310.60 | 1318.65 | 1325.16 | 1335.47 | 1337.52 | 1234.58 | 1241.12 | 1248.60 | 1251.24 | 1253.55 | 1300.46 |
| 1354.06 | 1366.83 | 1369.67 | 1389.30 | 1392.41 | 1394.54 | 1303.47 | 1306.80 | 1309.68 | 1327.48 | 1346.52 | 1357.05 |
| 1396.82 | 1419.24 | 1419.37 | 1425.98 | 1456.08 | 1469.95 | 1366.84 | 1375.59 | 1388.59 | 1391.02 | 1403.60 | 1413.98 |
| 1476.09 | 1481.04 | 1482.00 | 1488.60 | 1488.81 | 1489.66 | 1417.93 | 1420.83 | 1422.17 | 1437.58 | 1452.08 | 1468.86 |
| 1500.28 | 1500.77 | 1511.45 | 1515.70 | 1520.40 | 1522.59 | 1472.51 | 1480.99 | 1481.54 | 1481.70 | 1484.60 | 1487.41 |
| 1532.91 | 1543.23 | 1548.03 | 1597.36 | 1620.59 | 1661.72 | 1501.17 | 1501.87 | 1502.58 | 1506.56 | 1517.09 | 1519.39 |
| 1725.85 | 1755.67 | 1793.28 | 3026.60 | 3039.73 | 3043.62 | 1525.94 | 1527.23 | 1528.78 | 1552.11 | 1628.05 | 1642.99 |
| 3052.15 | 3056.42 | 3057.66 | 3058.76 | 3066.45 | 3075.35 | 1656.31 | 1715.50 | 1731.09 | 1742.65 | 2964.71 | 2998.93 |
| 3076.57 | 3093.40 | 3107.41 | 3119.29 | 3121.90 | 3124.61 | 3020.58 | 3027.00 | 3033.65 | 3039.31 | 3052.00 | 3056.29 |
| 3126.65 | 3128.02 | 3132.59 | 3133.64 | 3148.16 | 3148.95 | 3057.38 | 3058.74 | 3062.25 | 3073.71 | 3088.27 | 3094.45 |
| 3155.81 | 3159.59 | 3163.37 | 3166.60 | 3197.18 | 3216.29 | 3096.59 | 3100.88 | 3104.96 | 3107.51 | 3129.80 | 3134.42 |
| 3221.74 | 3242.94 | 3601.70 |         |         |         | 3142.71 | 3145.55 | 3147.31 | 3164.94 | 3172.83 | 3189.23 |

=====

B6-TS'

=====

|         |         |         |         |         |         |
|---------|---------|---------|---------|---------|---------|
| -197.96 | 37.28   | 39.60   | 45.45   | 53.62   | 61.46   |
| 67.99   | 79.00   | 86.42   | 92.58   | 100.25  | 104.32  |
| 113.96  | 121.83  | 124.02  | 151.52  | 158.89  | 164.05  |
| 173.45  | 188.00  | 207.39  | 212.12  | 223.51  | 239.81  |
| 255.90  | 278.44  | 279.91  | 284.20  | 298.40  | 301.16  |
| 316.79  | 323.54  | 332.05  | 348.85  | 363.12  | 381.41  |
| 383.74  | 409.01  | 414.07  | 419.48  | 439.52  | 451.52  |
| 458.06  | 474.49  | 491.83  | 529.92  | 546.39  | 548.59  |
| 557.72  | 576.88  | 602.06  | 609.95  | 640.67  | 649.44  |
| 655.36  | 675.43  | 694.53  | 728.72  | 747.14  | 773.20  |
| 806.07  | 808.47  | 861.60  | 875.31  | 882.09  | 899.56  |
| 908.83  | 913.02  | 930.56  | 933.87  | 949.51  | 950.19  |
| 956.92  | 971.40  | 984.11  | 985.43  | 995.19  | 1009.96 |
| 1020.54 | 1023.22 | 1027.36 | 1050.93 | 1057.05 | 1062.38 |
| 1065.48 | 1072.24 | 1072.77 | 1079.62 | 1097.16 | 1116.72 |

=====

B7'

=====

|         |         |         |         |         |         |
|---------|---------|---------|---------|---------|---------|
| 33.65   | 43.34   | 45.27   | 51.64   | 54.08   | 61.78   |
| 67.63   | 75.25   | 85.56   | 108.50  | 108.63  | 115.62  |
| 124.48  | 130.76  | 150.62  | 160.14  | 169.85  | 171.37  |
| 177.14  | 194.72  | 211.83  | 218.47  | 224.23  | 242.24  |
| 254.40  | 263.11  | 279.78  | 283.36  | 293.37  | 298.48  |
| 304.77  | 313.33  | 320.49  | 328.82  | 357.16  | 371.36  |
| 378.75  | 405.94  | 418.84  | 428.29  | 438.04  | 456.32  |
| 467.56  | 487.23  | 491.33  | 530.66  | 545.78  | 551.21  |
| 562.59  | 596.03  | 602.02  | 609.13  | 643.67  | 653.24  |
| 665.34  | 674.90  | 696.70  | 741.26  | 757.01  | 775.96  |
| 806.41  | 810.57  | 865.76  | 876.48  | 891.10  | 909.67  |
| 915.94  | 923.62  | 933.43  | 937.23  | 950.81  | 951.27  |
| 978.46  | 980.82  | 986.54  | 992.69  | 1011.61 | 1018.10 |
| 1021.53 | 1027.31 | 1048.01 | 1048.82 | 1060.02 | 1061.54 |

|         |         |         |         |         |         |         |         |         |         |         |         |
|---------|---------|---------|---------|---------|---------|---------|---------|---------|---------|---------|---------|
| 1065.04 | 1070.65 | 1073.02 | 1079.89 | 1110.60 | 1116.01 | 1023.39 | 1029.99 | 1032.02 | 1034.15 | 1041.80 | 1049.67 |
| 1122.81 | 1139.04 | 1191.02 | 1205.41 | 1208.90 | 1235.12 | 1062.45 | 1068.40 | 1076.58 | 1077.18 | 1079.91 | 1087.38 |
| 1238.27 | 1249.06 | 1250.18 | 1254.86 | 1287.08 | 1301.29 | 1122.80 | 1147.87 | 1155.51 | 1177.09 | 1194.51 | 1211.36 |
| 1305.53 | 1311.30 | 1316.60 | 1326.25 | 1344.00 | 1355.16 | 1214.81 | 1233.63 | 1238.89 | 1244.73 | 1252.25 | 1259.73 |
| 1366.79 | 1374.27 | 1386.54 | 1390.20 | 1390.84 | 1409.27 | 1263.21 | 1269.03 | 1288.48 | 1307.53 | 1319.17 | 1350.80 |
| 1418.67 | 1422.90 | 1423.30 | 1436.28 | 1453.07 | 1469.86 | 1355.79 | 1383.12 | 1388.35 | 1389.92 | 1395.31 | 1400.76 |
| 1472.85 | 1478.75 | 1480.66 | 1480.88 | 1485.21 | 1488.32 | 1410.73 | 1418.53 | 1419.34 | 1427.28 | 1456.24 | 1463.81 |
| 1490.86 | 1496.46 | 1505.28 | 1506.53 | 1506.91 | 1516.30 | 1464.23 | 1474.28 | 1477.13 | 1479.07 | 1486.44 | 1488.97 |
| 1523.93 | 1525.11 | 1529.95 | 1542.05 | 1627.96 | 1654.35 | 1493.61 | 1495.25 | 1502.52 | 1504.64 | 1505.12 | 1508.91 |
| 1657.10 | 1732.21 | 1738.82 | 1778.60 | 2960.47 | 2998.99 | 1514.47 | 1521.90 | 1526.91 | 1544.05 | 1591.60 | 1610.80 |
| 3026.61 | 3034.71 | 3042.60 | 3044.71 | 3050.78 | 3053.86 | 1636.60 | 1653.27 | 1687.56 | 2613.80 | 2972.37 | 2976.20 |
| 3059.80 | 3060.95 | 3063.75 | 3075.20 | 3100.75 | 3102.61 | 2979.50 | 2982.64 | 2986.52 | 2994.62 | 3003.23 | 3009.90 |
| 3111.36 | 3114.57 | 3120.44 | 3124.18 | 3135.06 | 3139.68 | 3014.21 | 3014.89 | 3016.80 | 3021.25 | 3037.08 | 3046.41 |
| 3144.26 | 3146.63 | 3149.99 | 3169.15 | 3178.75 | 3189.40 | 3050.80 | 3052.44 | 3053.45 | 3059.64 | 3074.40 | 3075.72 |
| 3211.53 | 3218.06 | 3234.97 |         |         |         | 3077.64 | 3078.61 | 3096.97 | 3102.33 | 3119.70 | 3123.15 |

=====

B7'-TS

=====

|         |        |        |         |         |         |
|---------|--------|--------|---------|---------|---------|
| -368.40 | 40.41  | 47.54  | 66.61   | 69.23   | 81.92   |
| 86.81   | 89.66  | 103.03 | 104.76  | 113.93  | 127.37  |
| 128.91  | 149.96 | 152.89 | 160.20  | 171.61  | 180.37  |
| 191.77  | 202.80 | 208.19 | 211.65  | 229.88  | 234.28  |
| 243.78  | 250.00 | 267.98 | 288.96  | 293.83  | 308.37  |
| 314.79  | 317.15 | 333.26 | 338.68  | 351.69  | 368.67  |
| 376.55  | 390.26 | 420.36 | 428.28  | 432.25  | 450.91  |
| 471.63  | 490.84 | 502.33 | 508.82  | 540.81  | 564.50  |
| 567.64  | 588.37 | 618.82 | 620.25  | 635.43  | 641.93  |
| 657.12  | 660.00 | 683.27 | 715.80  | 756.26  | 784.39  |
| 823.82  | 843.29 | 853.63 | 872.74  | 891.08  | 895.06  |
| 903.20  | 912.44 | 913.31 | 929.89  | 948.21  | 953.77  |
| 957.88  | 978.29 | 988.35 | 1002.47 | 1008.21 | 1012.44 |

|         |         |         |  |  |  |
|---------|---------|---------|--|--|--|
| 3133.61 | 3146.76 | 3152.70 |  |  |  |
|---------|---------|---------|--|--|--|

=====

B7''

=====

|        |        |        |        |        |        |
|--------|--------|--------|--------|--------|--------|
| 31.98  | 41.70  | 44.08  | 50.21  | 62.97  | 66.13  |
| 77.49  | 79.36  | 82.30  | 88.62  | 92.70  | 98.43  |
| 108.64 | 126.10 | 134.58 | 146.21 | 148.35 | 170.83 |
| 180.14 | 188.67 | 210.28 | 221.10 | 230.60 | 235.44 |
| 252.88 | 260.26 | 268.06 | 281.92 | 286.06 | 297.11 |
| 301.37 | 316.54 | 322.28 | 328.68 | 352.57 | 360.75 |
| 396.20 | 405.42 | 410.80 | 424.38 | 431.28 | 442.94 |
| 470.54 | 481.70 | 495.31 | 535.53 | 541.95 | 549.64 |
| 549.97 | 571.09 | 602.47 | 603.44 | 635.75 | 655.40 |
| 660.54 | 674.49 | 688.06 | 723.29 | 740.49 | 773.50 |
| 805.76 | 813.72 | 854.87 | 865.27 | 899.72 | 913.32 |
| 918.02 | 928.95 | 933.61 | 934.71 | 951.44 | 953.41 |

|         |         |         |         |         |         |         |         |         |         |         |         |
|---------|---------|---------|---------|---------|---------|---------|---------|---------|---------|---------|---------|
| 974.08  | 980.03  | 983.03  | 993.74  | 1013.91 | 1024.06 | 907.00  | 918.96  | 925.05  | 927.37  | 949.86  | 951.23  |
| 1029.95 | 1034.44 | 1049.87 | 1054.66 | 1058.74 | 1066.05 | 956.86  | 972.88  | 981.04  | 982.42  | 1003.51 | 1005.01 |
| 1071.70 | 1078.11 | 1086.09 | 1091.25 | 1109.19 | 1120.82 | 1013.46 | 1031.30 | 1040.85 | 1045.20 | 1050.61 | 1060.65 |
| 1132.13 | 1140.93 | 1196.22 | 1199.08 | 1206.21 | 1217.73 | 1064.17 | 1065.44 | 1069.77 | 1075.35 | 1078.17 | 1101.06 |
| 1237.97 | 1243.87 | 1254.78 | 1257.83 | 1270.25 | 1284.01 | 1107.88 | 1132.95 | 1147.07 | 1188.30 | 1196.33 | 1209.73 |
| 1285.24 | 1303.08 | 1313.08 | 1328.86 | 1342.66 | 1346.08 | 1211.10 | 1245.40 | 1246.59 | 1253.13 | 1266.77 | 1272.17 |
| 1367.81 | 1381.22 | 1383.03 | 1385.22 | 1386.51 | 1404.32 | 1289.19 | 1299.85 | 1301.81 | 1326.19 | 1340.06 | 1356.78 |
| 1412.69 | 1417.77 | 1419.13 | 1422.07 | 1450.05 | 1464.13 | 1367.29 | 1377.19 | 1378.50 | 1381.41 | 1387.69 | 1391.58 |
| 1471.38 | 1477.28 | 1482.82 | 1485.37 | 1488.25 | 1491.78 | 1397.98 | 1416.99 | 1419.47 | 1422.13 | 1430.37 | 1450.54 |
| 1492.63 | 1493.41 | 1508.16 | 1510.33 | 1513.49 | 1520.17 | 1473.41 | 1476.44 | 1485.45 | 1489.81 | 1491.76 | 1493.64 |
| 1522.57 | 1529.92 | 1540.86 | 1545.62 | 1623.01 | 1660.01 | 1499.07 | 1501.15 | 1502.84 | 1508.12 | 1513.99 | 1514.78 |
| 1689.24 | 1738.73 | 1776.31 | 2559.84 | 2915.77 | 2996.01 | 1521.96 | 1525.37 | 1539.36 | 1553.87 | 1624.70 | 1646.36 |
| 3010.87 | 3032.91 | 3035.78 | 3037.11 | 3044.65 | 3045.76 | 1698.35 | 1703.36 | 1712.45 | 2586.28 | 2965.43 | 3012.30 |
| 3054.73 | 3055.12 | 3059.64 | 3067.12 | 3092.70 | 3101.43 | 3028.92 | 3035.02 | 3036.72 | 3041.36 | 3050.67 | 3050.86 |
| 3101.88 | 3118.07 | 3119.87 | 3124.31 | 3132.04 | 3138.34 | 3063.81 | 3073.09 | 3086.79 | 3099.37 | 3103.26 | 3105.31 |
| 3142.90 | 3147.75 | 3166.69 | 3169.01 | 3183.05 | 3186.84 | 3105.49 | 3107.83 | 3110.72 | 3116.96 | 3129.56 | 3136.29 |
| 3193.06 | 3217.35 | 3235.36 |         |         |         | 3139.83 | 3148.49 | 3156.91 | 3163.65 | 3179.43 | 3181.48 |

=====

B7"-TS

=====

|         |        |        |        |        |        |
|---------|--------|--------|--------|--------|--------|
| -281.16 | 17.58  | 36.22  | 42.14  | 56.91  | 61.36  |
| 66.38   | 71.49  | 73.56  | 78.38  | 82.48  | 88.66  |
| 98.79   | 113.29 | 125.48 | 128.99 | 141.85 | 154.34 |
| 165.82  | 168.87 | 184.93 | 190.68 | 200.68 | 210.98 |
| 227.94  | 244.09 | 253.65 | 258.48 | 262.41 | 284.62 |
| 293.71  | 296.86 | 299.14 | 323.70 | 333.43 | 341.30 |
| 363.26  | 382.17 | 386.18 | 408.02 | 418.11 | 424.05 |
| 442.07  | 466.52 | 494.54 | 536.14 | 541.08 | 560.91 |
| 573.72  | 594.42 | 606.45 | 610.68 | 626.44 | 635.71 |
| 667.47  | 682.97 | 684.89 | 733.83 | 758.05 | 766.53 |
| 820.88  | 831.44 | 865.40 | 880.00 | 892.07 | 903.94 |

3198.73 3201.18 3210.09

=====

B7'''

=====

|        |        |        |        |        |        |
|--------|--------|--------|--------|--------|--------|
| 20.44  | 39.04  | 43.88  | 57.23  | 59.23  | 60.02  |
| 66.65  | 69.66  | 78.62  | 83.41  | 87.10  | 109.30 |
| 115.19 | 137.59 | 141.31 | 142.67 | 155.82 | 167.23 |
| 182.41 | 197.62 | 204.56 | 214.75 | 225.10 | 242.56 |
| 253.01 | 258.50 | 266.38 | 271.50 | 278.21 | 288.85 |
| 293.25 | 308.64 | 319.17 | 337.98 | 348.44 | 357.73 |
| 376.48 | 408.49 | 415.03 | 427.48 | 436.47 | 471.12 |
| 489.74 | 516.83 | 525.66 | 530.40 | 534.23 | 543.07 |
| 559.08 | 600.55 | 608.55 | 620.51 | 628.52 | 654.67 |
| 670.97 | 684.96 | 693.11 | 720.17 | 745.29 | 771.35 |

|         |         |         |         |         |         |         |         |         |         |         |         |
|---------|---------|---------|---------|---------|---------|---------|---------|---------|---------|---------|---------|
| 776.12  | 803.29  | 837.67  | 857.39  | 898.80  | 908.24  | 240.97  | 248.93  | 260.23  | 270.35  | 273.71  | 278.26  |
| 918.62  | 931.30  | 936.13  | 939.00  | 944.67  | 950.72  | 285.74  | 304.17  | 313.01  | 318.92  | 325.83  | 345.68  |
| 955.47  | 983.18  | 984.71  | 992.72  | 1012.26 | 1027.78 | 360.89  | 411.53  | 412.93  | 418.48  | 428.20  | 441.03  |
| 1032.97 | 1034.17 | 1040.42 | 1041.81 | 1060.29 | 1061.69 | 459.61  | 475.96  | 525.31  | 526.58  | 539.59  | 553.90  |
| 1064.81 | 1068.96 | 1073.36 | 1081.35 | 1092.32 | 1114.02 | 567.23  | 583.17  | 606.81  | 610.62  | 628.94  | 638.92  |
| 1137.03 | 1140.90 | 1170.08 | 1197.71 | 1200.66 | 1211.16 | 669.74  | 685.28  | 688.23  | 700.75  | 752.06  | 770.67  |
| 1231.28 | 1236.79 | 1248.17 | 1258.73 | 1262.33 | 1278.76 | 817.15  | 821.22  | 852.89  | 872.72  | 882.53  | 893.99  |
| 1289.75 | 1309.64 | 1312.34 | 1314.14 | 1332.49 | 1337.68 | 906.26  | 916.26  | 925.96  | 937.93  | 947.69  | 951.77  |
| 1342.40 | 1374.24 | 1380.74 | 1386.81 | 1393.48 | 1402.26 | 954.31  | 957.00  | 978.17  | 986.82  | 999.18  | 1007.75 |
| 1418.57 | 1420.96 | 1421.42 | 1427.18 | 1457.43 | 1460.45 | 1009.22 | 1013.44 | 1033.53 | 1037.04 | 1040.35 | 1052.00 |
| 1477.09 | 1478.56 | 1482.19 | 1482.92 | 1489.81 | 1491.70 | 1062.17 | 1062.78 | 1067.12 | 1068.28 | 1071.64 | 1084.21 |
| 1493.05 | 1500.58 | 1503.42 | 1505.71 | 1514.17 | 1522.11 | 1123.31 | 1131.75 | 1151.90 | 1190.38 | 1202.93 | 1209.65 |
| 1527.02 | 1534.34 | 1548.81 | 1568.07 | 1629.47 | 1646.50 | 1211.77 | 1226.25 | 1246.97 | 1259.75 | 1262.42 | 1273.68 |
| 1657.95 | 1760.87 | 1841.67 | 2894.79 | 2972.10 | 2992.13 | 1278.21 | 1303.88 | 1308.36 | 1323.80 | 1339.66 | 1341.59 |
| 3001.94 | 3032.95 | 3042.29 | 3045.27 | 3045.64 | 3051.10 | 1352.23 | 1359.57 | 1369.80 | 1378.64 | 1388.18 | 1395.23 |
| 3058.52 | 3059.25 | 3080.27 | 3105.91 | 3108.84 | 3110.06 | 1409.40 | 1420.87 | 1423.65 | 1430.09 | 1431.38 | 1459.91 |
| 3114.74 | 3118.95 | 3126.14 | 3131.58 | 3133.39 | 3133.68 | 1469.50 | 1475.55 | 1479.82 | 1481.39 | 1487.33 | 1490.42 |
| 3137.68 | 3148.90 | 3156.65 | 3167.88 | 3173.45 | 3189.15 | 1491.74 | 1495.80 | 1498.27 | 1500.97 | 1507.47 | 1510.55 |
| 3194.94 | 3218.69 | 3254.16 |         |         |         | 1517.67 | 1529.31 | 1530.07 | 1541.88 | 1626.76 | 1648.75 |
| =====   |         |         |         |         |         | 1661.53 | 1729.13 | 1822.62 | 2942.27 | 2997.85 | 3000.47 |
| B7"-TS  |         |         |         |         |         | 3035.86 | 3046.18 | 3048.71 | 3053.39 | 3057.76 | 3057.82 |
| =====   |         |         |         |         |         | 3066.31 | 3080.10 | 3104.39 | 3104.77 | 3107.78 | 3117.39 |
| -265.36 | 11.66   | 33.97   | 55.06   | 61.86   | 66.40   | 3118.42 | 3121.37 | 3122.80 | 3124.29 | 3131.15 | 3133.49 |
| 73.87   | 77.03   | 80.06   | 84.60   | 90.81   | 97.30   | 3139.17 | 3154.69 | 3166.55 | 3170.87 | 3177.03 | 3188.88 |
| 105.29  | 111.17  | 121.99  | 129.50  | 138.62  | 157.04  | 3210.00 | 3216.84 | 3221.32 |         |         |         |
| 164.77  | 169.41  | 185.49  | 196.05  | 220.31  | 230.08  |         |         |         |         |         |         |

## VI. Reference

- (1) D. Morton, D. Pearson, R. A. Field, R. A. Stockman, *Synlett* **2003**, *13*, 1985.
- (2) (a) S. D. Kuduk, R. M. DiPardo, R. K. Chang, C. Ng, M. G. Bock, *Tetrahedron Lett.* **2004**, *45*, 6641;  
(b) K. R. Prasad, O. Revu, *Tetrahedron* **2013**, *69*, 8422.
- (3) B. Li, M. Driess, J. F. Hartwig, *J. Am. Chem. Soc.* **2014**, *136*, 6586.
- (4) P. A. Evans, J. D. Roseman, L. T. Garber, *Synth. Commun.* **1996**, *26*, 4685.
- (5) S. Lee, P. S. J. Kaib, B. List, *J. Am. Chem. Soc.* **2017**, *139*, 2156.
- (6) Parr, R. G.; Yang, W., *Density Functional Theory of Atoms and Molecules*. Oxford University Press: New York, **1989**.
- (7) Bochevarov, A. D.; Harder, E.; Hughes, T. F.; Greenwood, J. R.; Braden, D. A.; Philipp, D. M.; Rinaldo, D.; Halls, M. D.; Zhang, J.; Friesner, R. A., *Int. J. Quantum Chem.* **2013**, *113*, 2110.
- (8) (a) Marten, B.; Kim, K.; Cortis, C.; Friesner, R. A.; Murphy, R. B.; Ringnald, M. N.; Sitkoff, D.; Honig, B., *J. Phys. Chem.* **1996**, *100*, 11775. (b) Edinger, S. R.; Cortis, C.; Shenkin, P. S.; Friesner, R. A., *J. Phys. Chem. B* **1997**, *101*, 1190. (c) Friedrichs, M.; Zhou, R. H.; Edinger, S. R.; Friesner, R. A., *J. Phys. Chem. B* **1999**, *103*, 3057.
- (9) Grimme, S.; Antony, J.; Ehrlich, S. & Krieg, H. *J. Chem. Phys.* **2010**, *132*, 154104.
- (10) Ditchfield, R.; Hehre, W. J.; Pople, J. A., *J. Chem. Phys.* **1971**, *54*, 724.
- (11) (a) Hay, P. J.; Wadt, W. R., *J. Chem. Phys.* **1985**, *82*, 270. (b) Wadt, W. R.; Hay, P. J., *J. Chem. Phys.* **1985**, *82*, 284. (c) Hay, P. J.; Wadt, W. R., *J. Chem. Phys.* **1985**, *82*, 299.
- (12) Dunning, T. H., Jr., *J. Chem. Phys.* **1989**, *90*, 1007.
- (13) (a) Marten, B.; Kim, K.; Cortis, C.; Friesner, R. A.; Murphy, R. B.; Ringnald, M. N.; Sitkoff, D.; Honig, B., *J. Phys. Chem.* **1996**, *100*, 11775. (b) Edinger, S. R.; Cortis, C.; Shenkin, P. S.; Friesner, R. A., *J. Phys. Chem. B* **1997**, *101*, 1190. (c) Friedrichs, M.; Zhou, R. H.; Edinger, S. R.; Friesner, R. A., *J. Phys. Chem. B* **1999**, *103*, 3057.

# *Appendix I*

**Spectral Copies of  $^1\text{H}$ ,  $^{13}\text{C}$  NMR Data  
Obtained in this Study**

***N*-((*S*)-2,2-dimethyl-1-(pyridin-2-yl)propyl)-2-((*S*)-tetrahydrofuran-2-yl)acetamide (2a).**

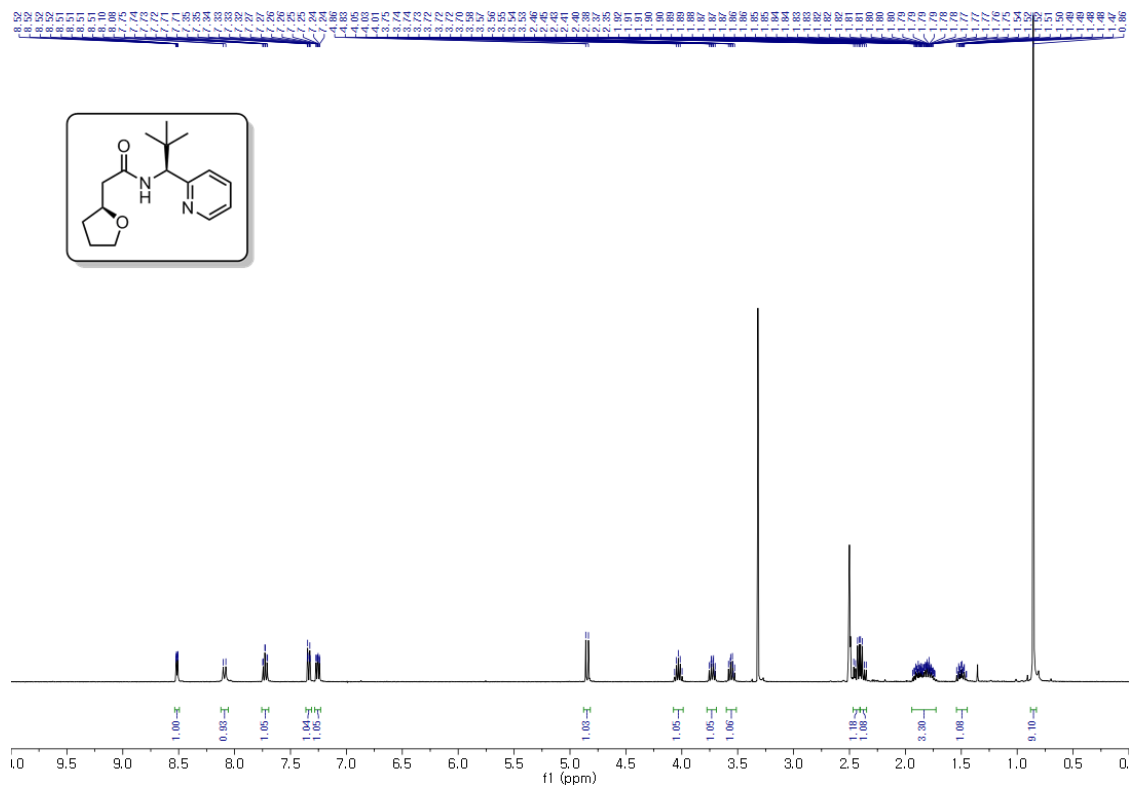

400 MHz, <sup>1</sup>H NMR in DMSO-*d*<sub>6</sub>

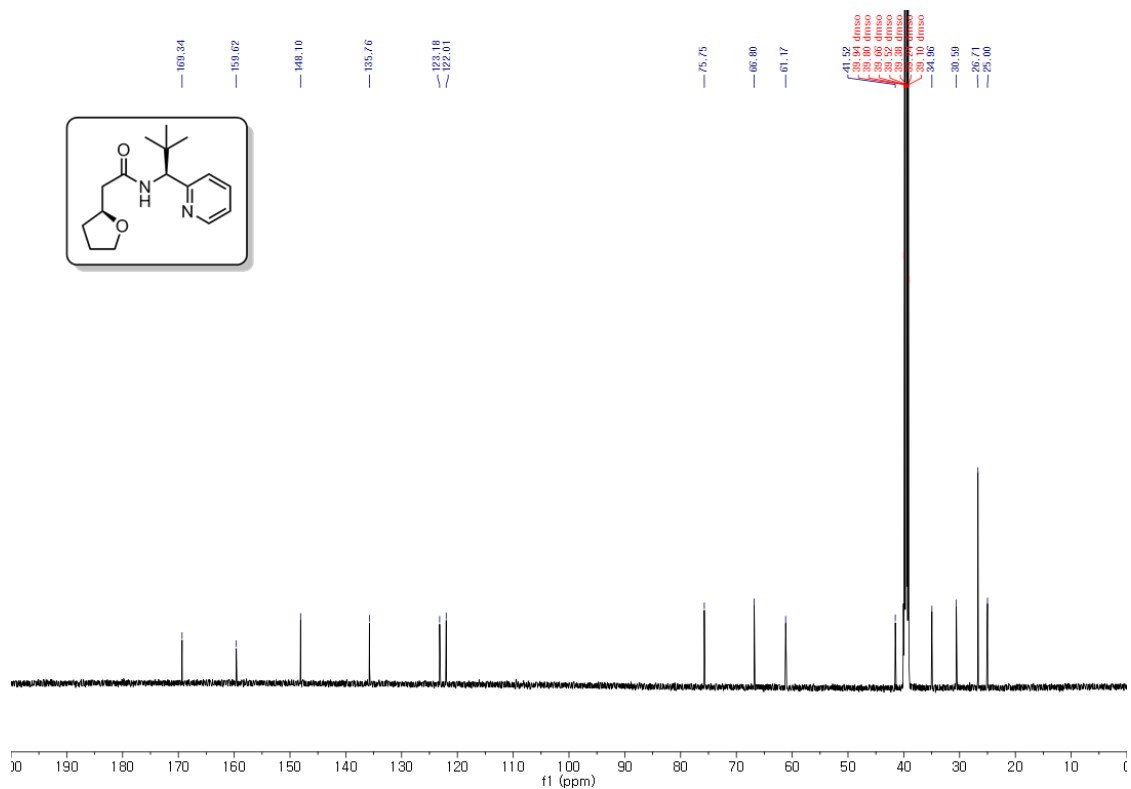

151 MHz, <sup>13</sup>C NMR in DMSO-*d*<sub>6</sub>

***N*-((*S*)-2,2-dimethyl-1-(pyridin-2-yl)propyl)-2-((*S*)-5,5-dimethyltetrahydrofuran-2-yl)acetamide (2b).**

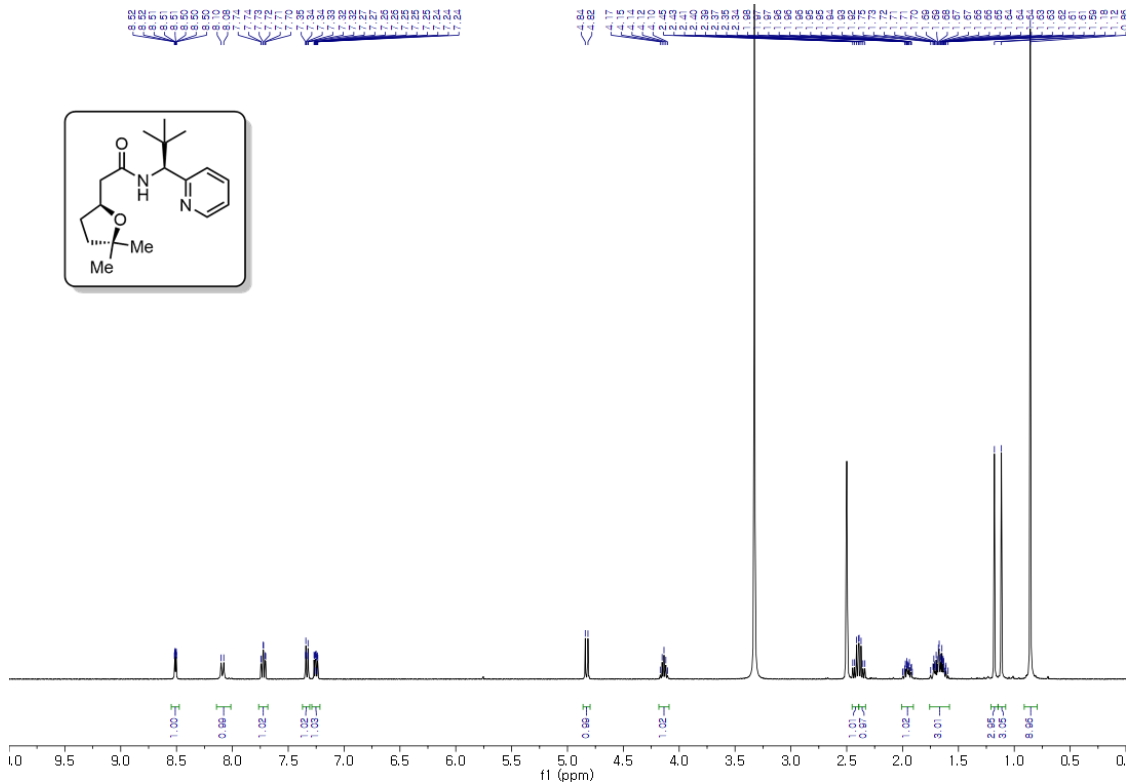

**400 MHz, <sup>1</sup>H NMR in DMSO-*d*<sub>6</sub>**

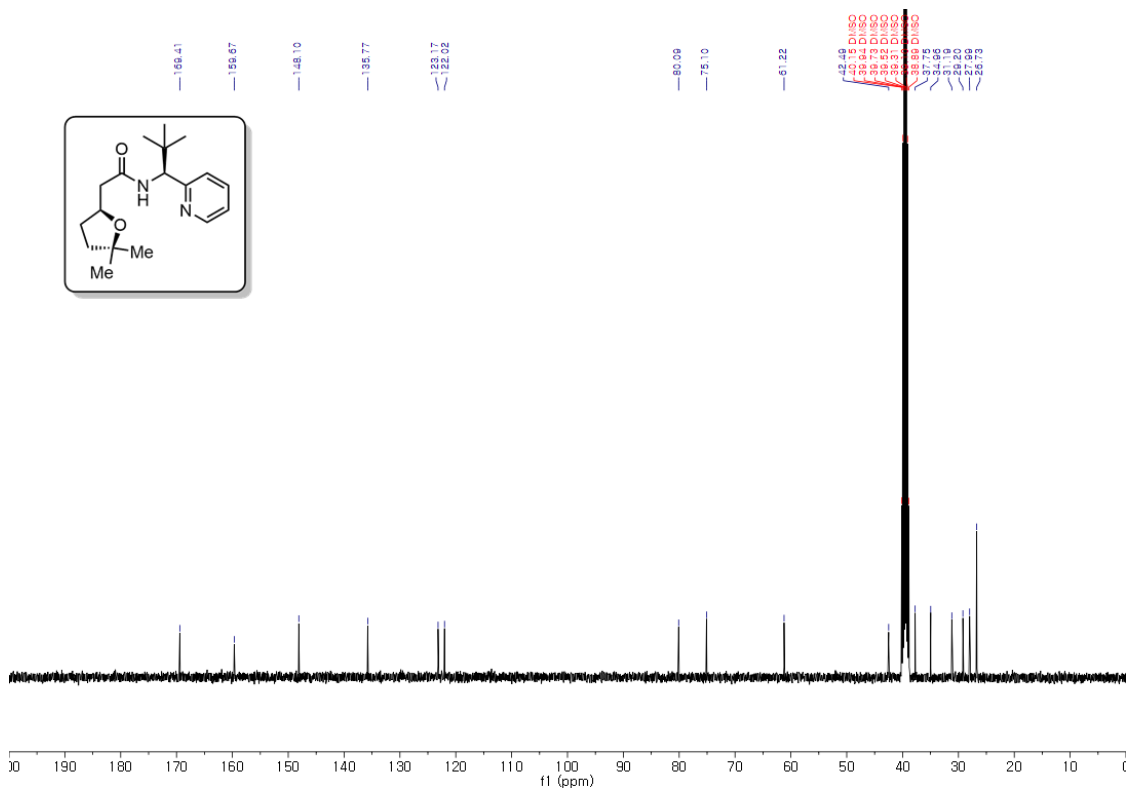

**151 MHz, <sup>13</sup>C NMR in DMSO-*d*<sub>6</sub>**



***N*-((*S*)-2,2-dimethyl-1-(pyridin-2-yl)propyl)-2-((*S*)-5-oxaspiro[3.4]octan-6-yl)acetamide (**2c**).**

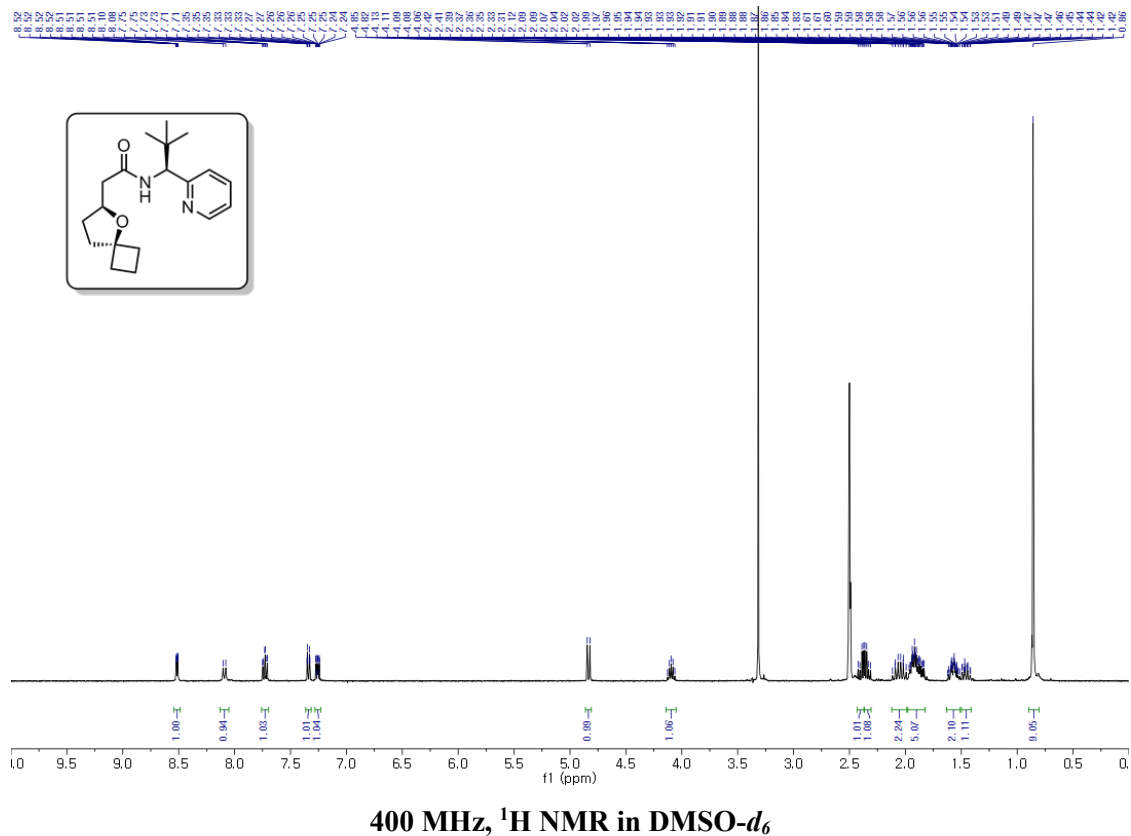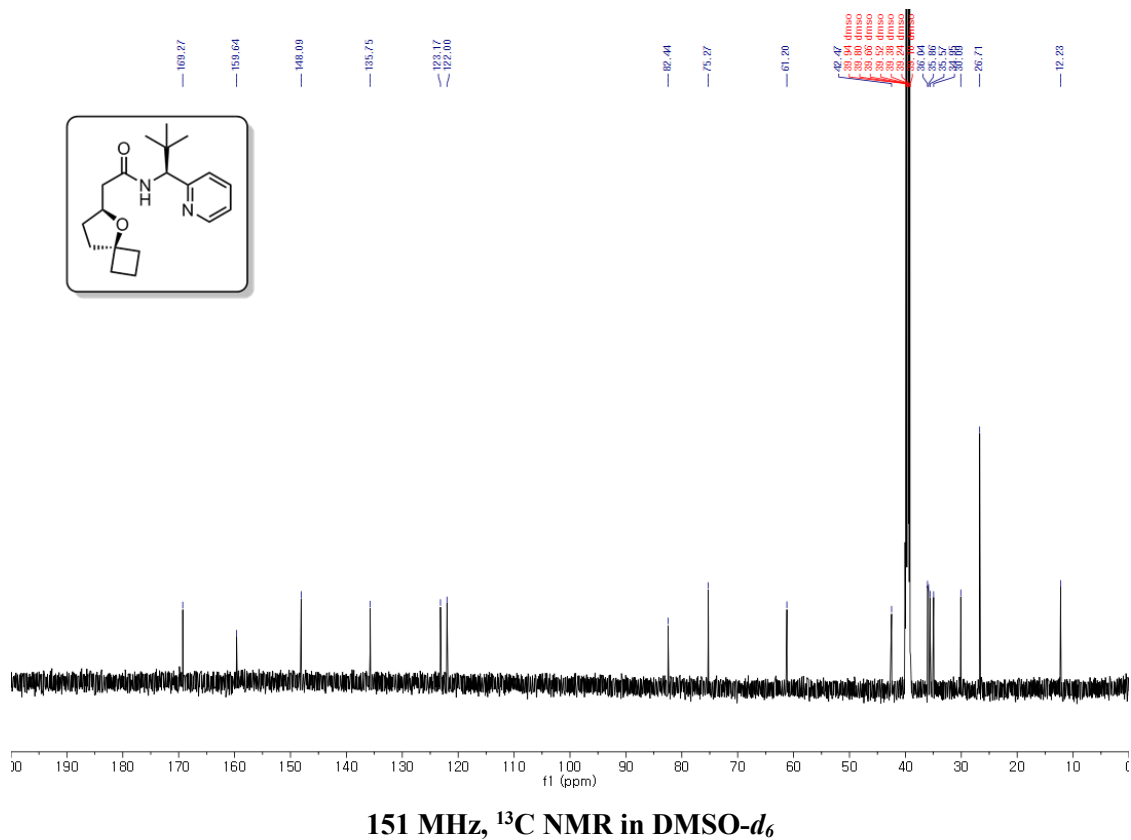

***N*-((*S*)-2,2-dimethyl-1-(pyridin-2-yl)propyl)-2-((2*S*,5*S*)-5-methyltetrahydrofuran-2-yl)acetamide (2d).**

Chemical structure and NMR spectra of compound 2d.

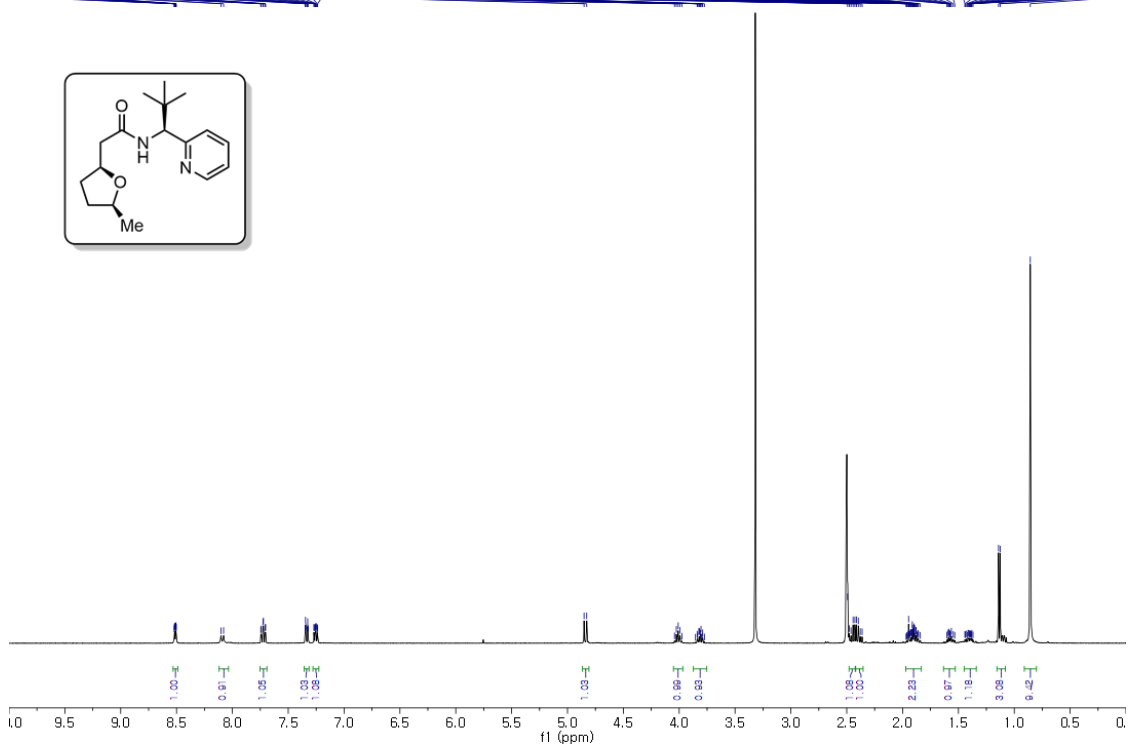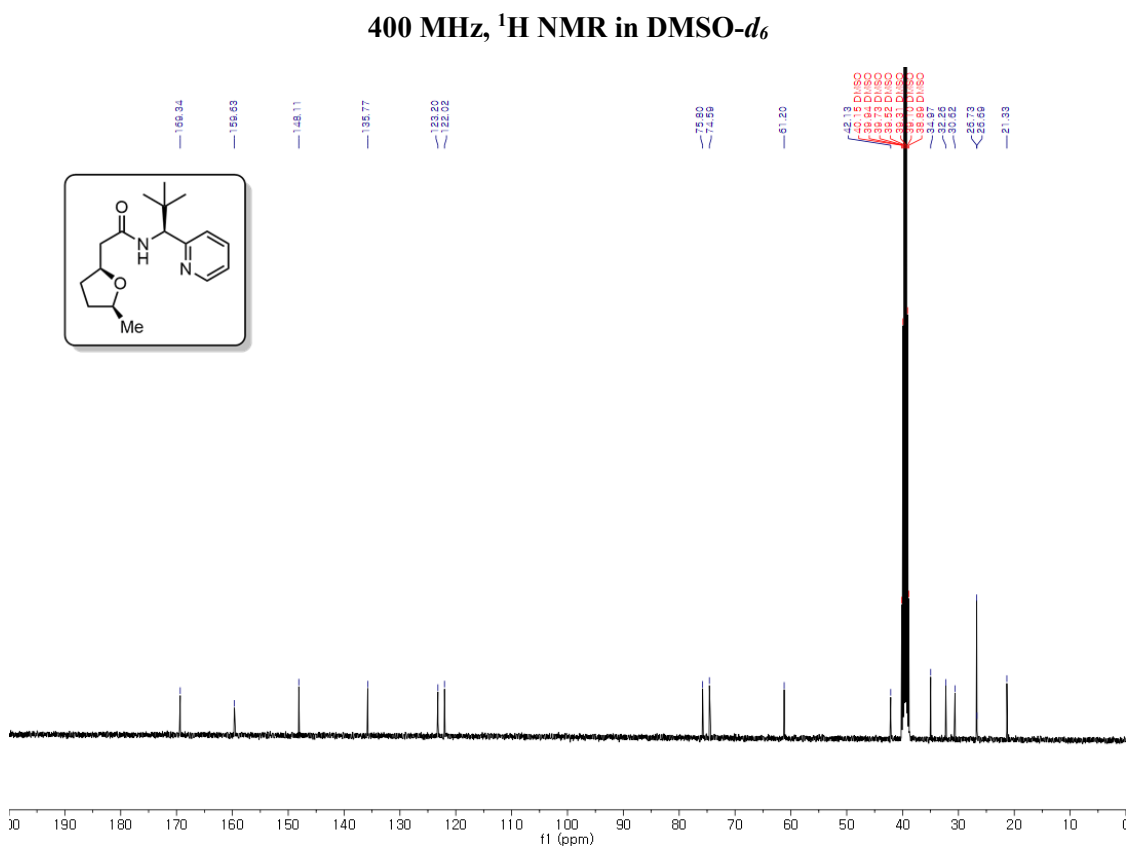

***N*-((*S*)-2,2-dimethyl-1-(pyridin-2-yl)propyl)-2-((*2S,5R*)-5-methyltetrahydrofuran-2-yl)acetamide (2e).**

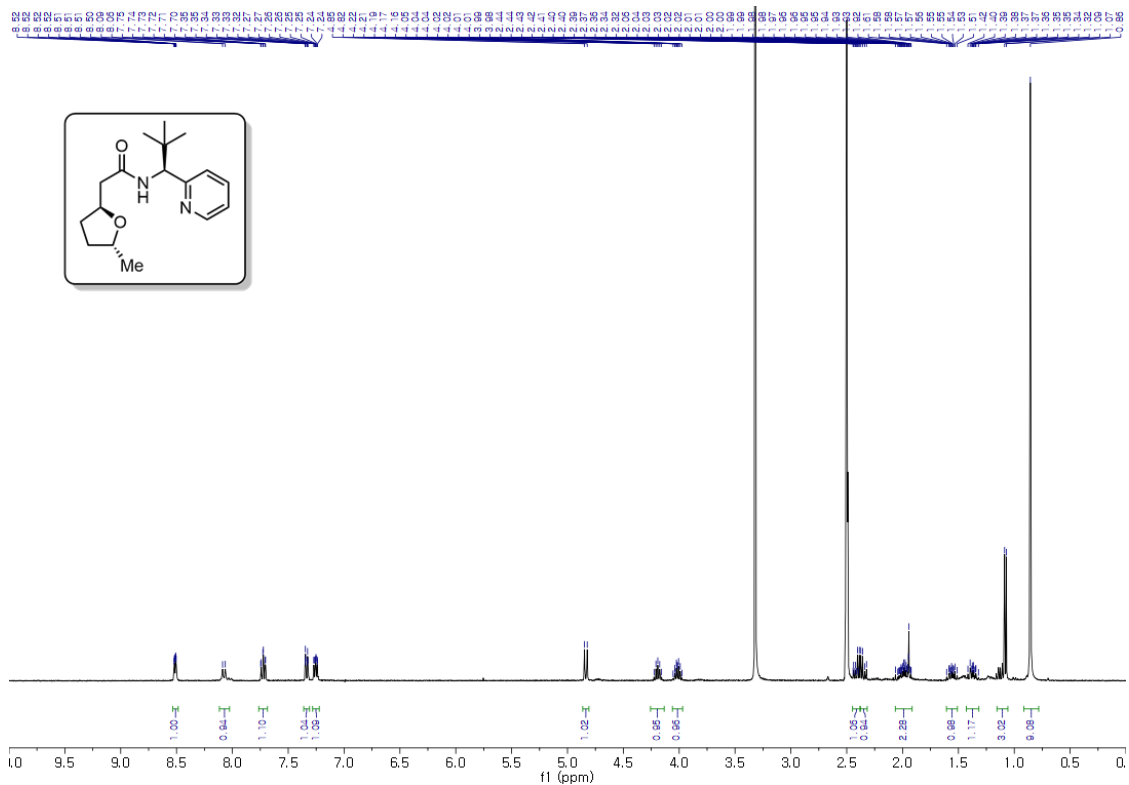

400 MHz, <sup>1</sup>H NMR in DMSO-*d*<sub>6</sub>

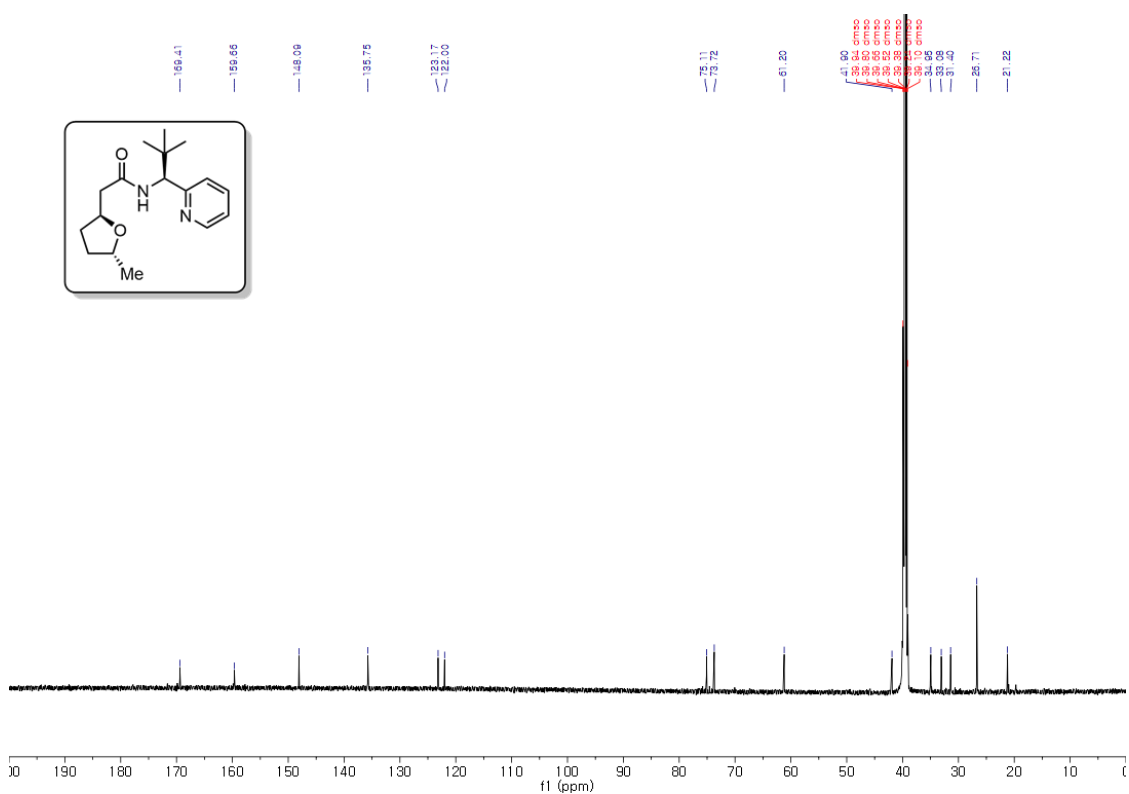

151 MHz, <sup>13</sup>C NMR in DMSO-*d*<sub>6</sub>

*tert*-butyl (S)-6-(2-(((S)-2,2-dimethyl-1-(pyridin-2-yl)propyl)amino)-2-oxoethyl)-5-oxa-2-azaspiro[3.4]octane-2-carboxylate (2f).

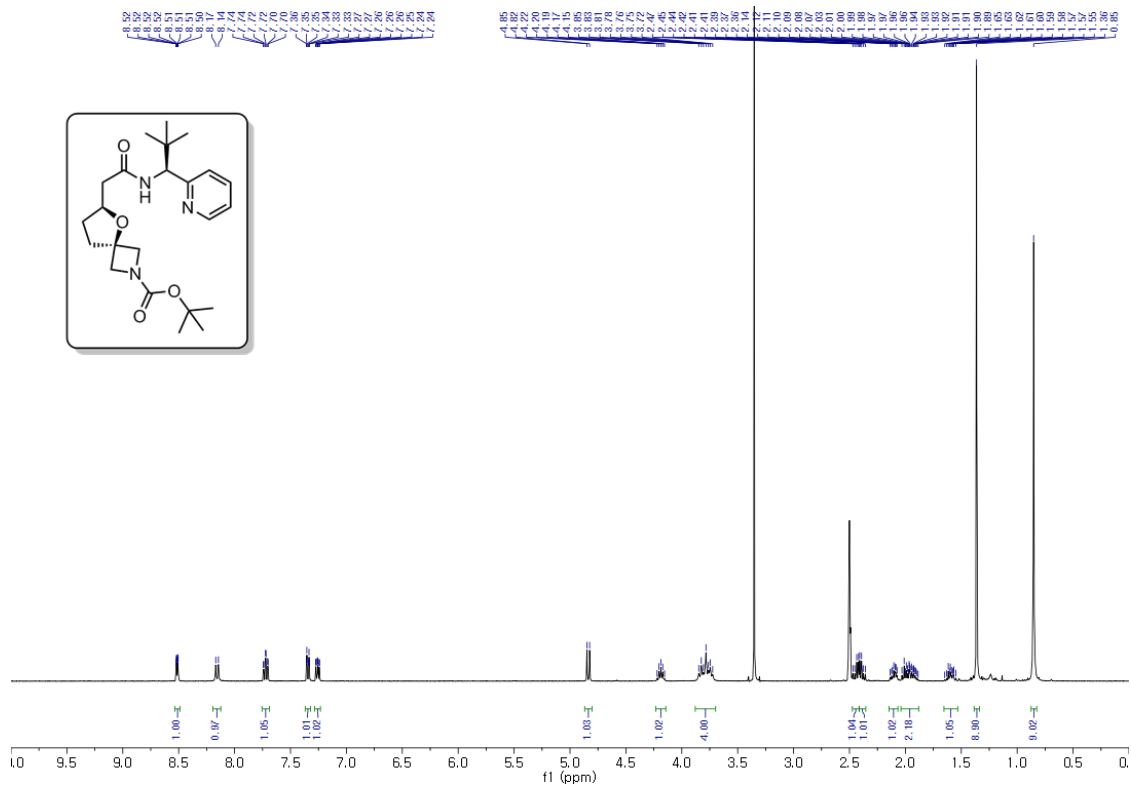

400 MHz, <sup>1</sup>H NMR in DMSO-*d*<sub>6</sub>

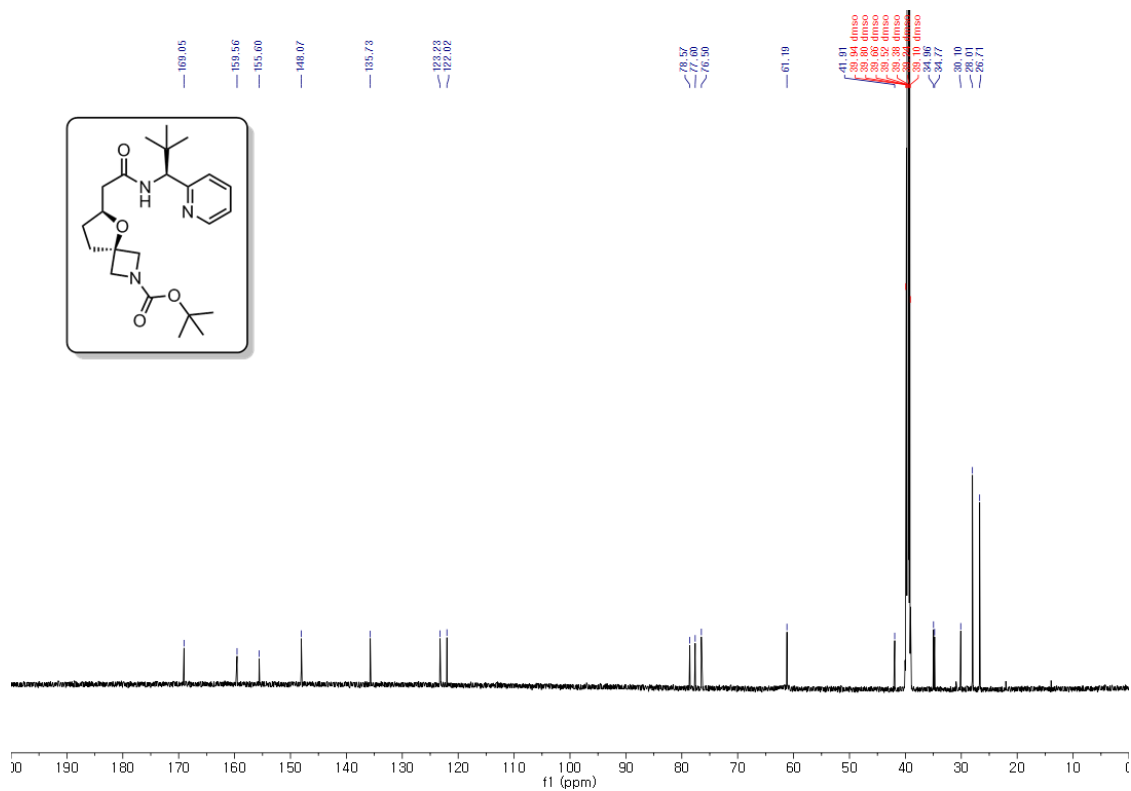

151 MHz, <sup>13</sup>C NMR in DMSO-*d*<sub>6</sub>

2-((*S*)-2-acetyl-5-oxa-2-azaspiro[3.4]octan-6-yl)-*N*-((*S*)-2,2-dimethyl-1-(pyridin-2-yl)propyl)acetamide (2g).

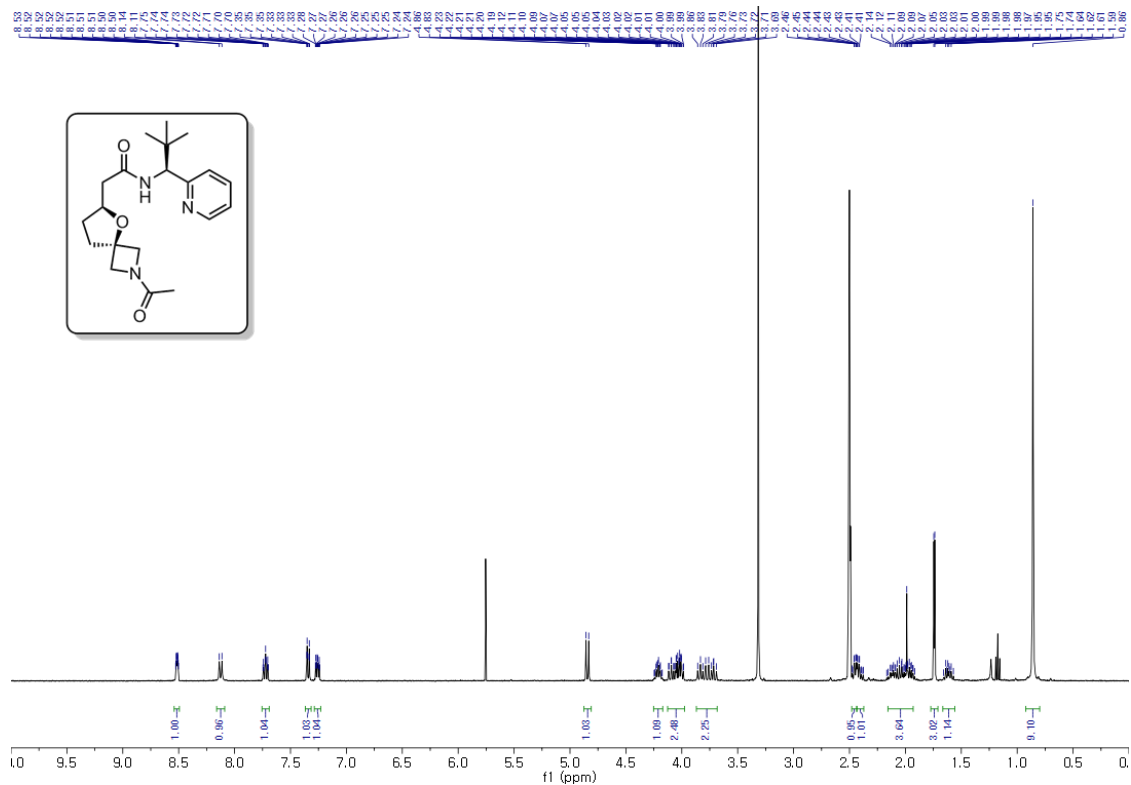

400 MHz,  $^1\text{H}$  NMR in  $\text{DMSO-}d_6$

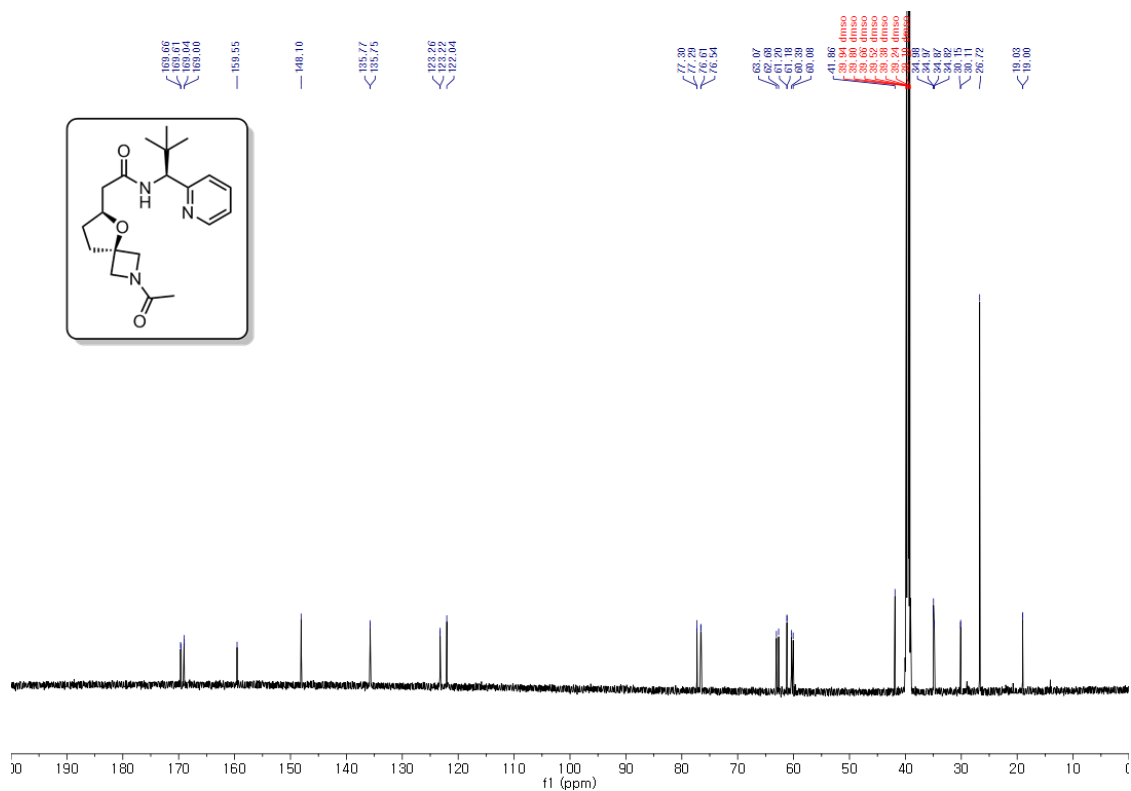

151 MHz,  $^{13}\text{C}$  NMR in  $\text{DMSO-}d_6$

***N*-((*S*)-2,2-dimethyl-1-(pyridin-2-yl)propyl)-2-((*S*)-2-(methylsulfonyl)-5-oxa-2-azaspiro[3.4]octan-6-yl)acetamide (2h).**

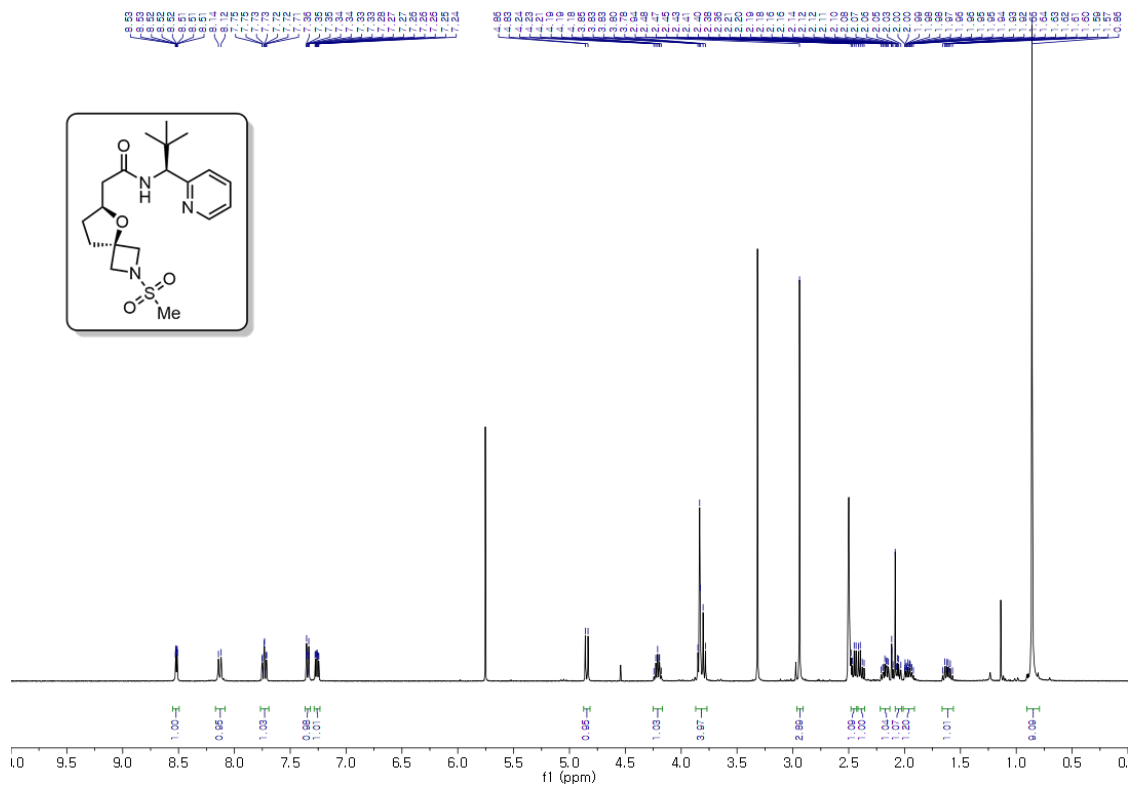

400 MHz, <sup>1</sup>H NMR in DMSO-*d*<sub>6</sub>

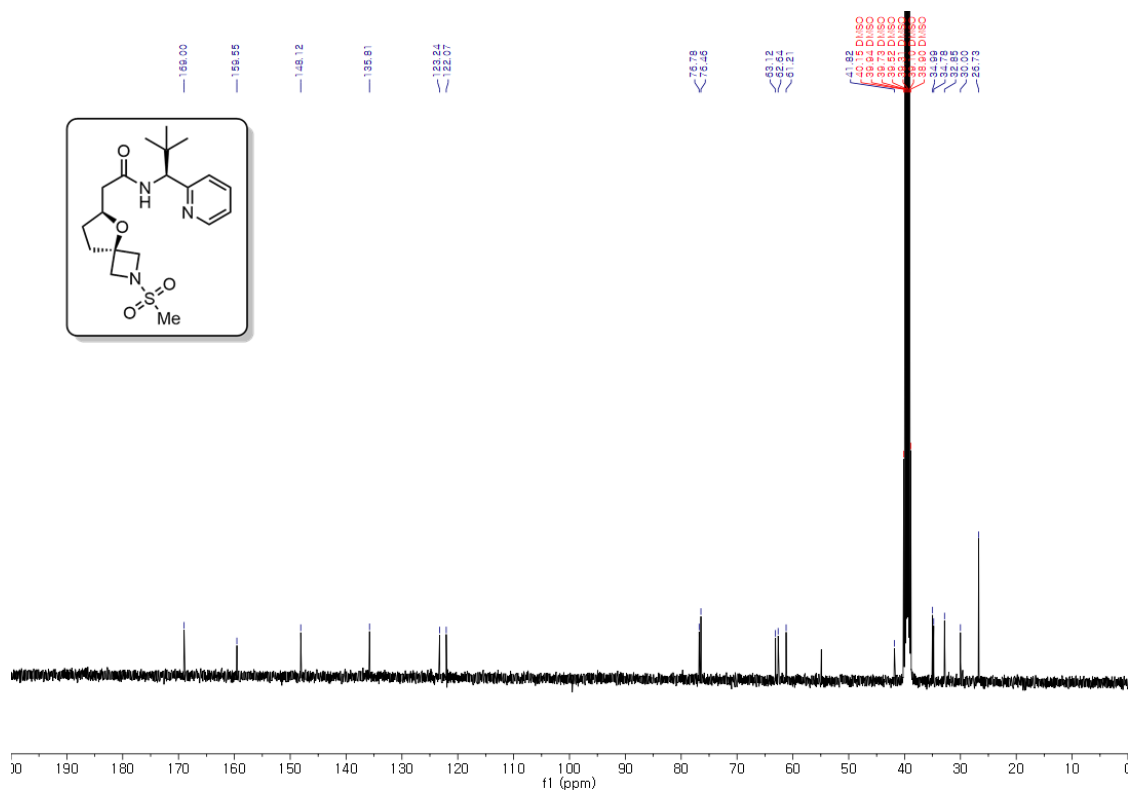

151 MHz, <sup>13</sup>C NMR in DMSO-*d*<sub>6</sub>

***N*-((*S*)-2,2-dimethyl-1-(pyridin-2-yl)propyl)-2-((*S*)-2-tosyl-5-oxa-2-azaspiro[3.4]octan-6-yl)acetamide (**2i**).**

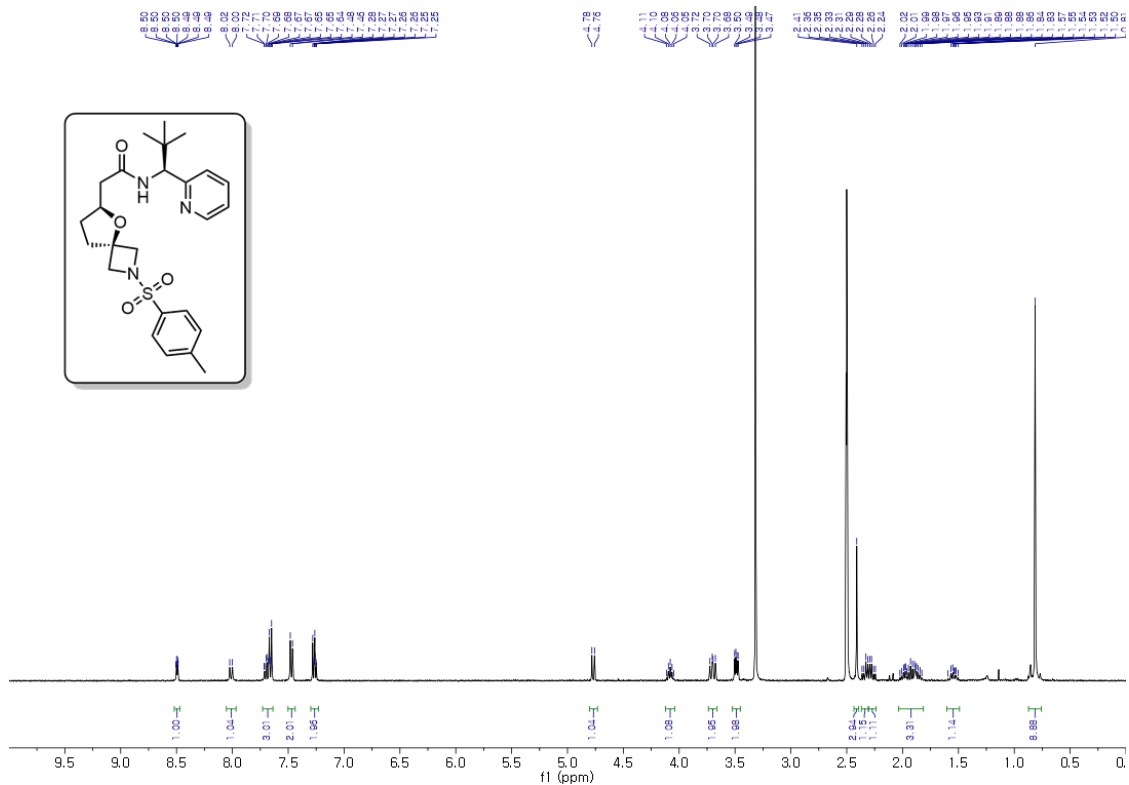

400 MHz, <sup>1</sup>H NMR in DMSO-*d*<sub>6</sub>

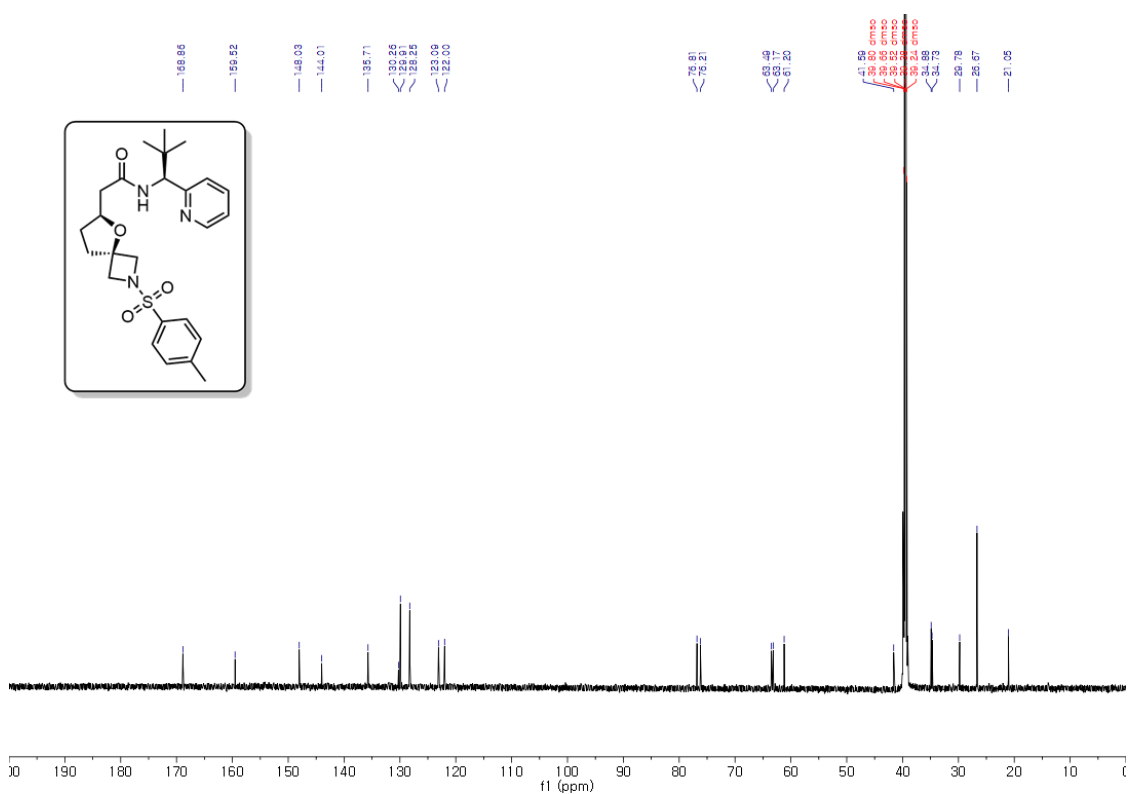

151 MHz, <sup>13</sup>C NMR in DMSO-*d*<sub>6</sub>

*N*-((*S*)-2,2-dimethyl-1-(pyridin-2-yl)propyl)-2-((*S*)-1-oxaspiro[4.4]nonan-2-yl)acetamide (**2j**).

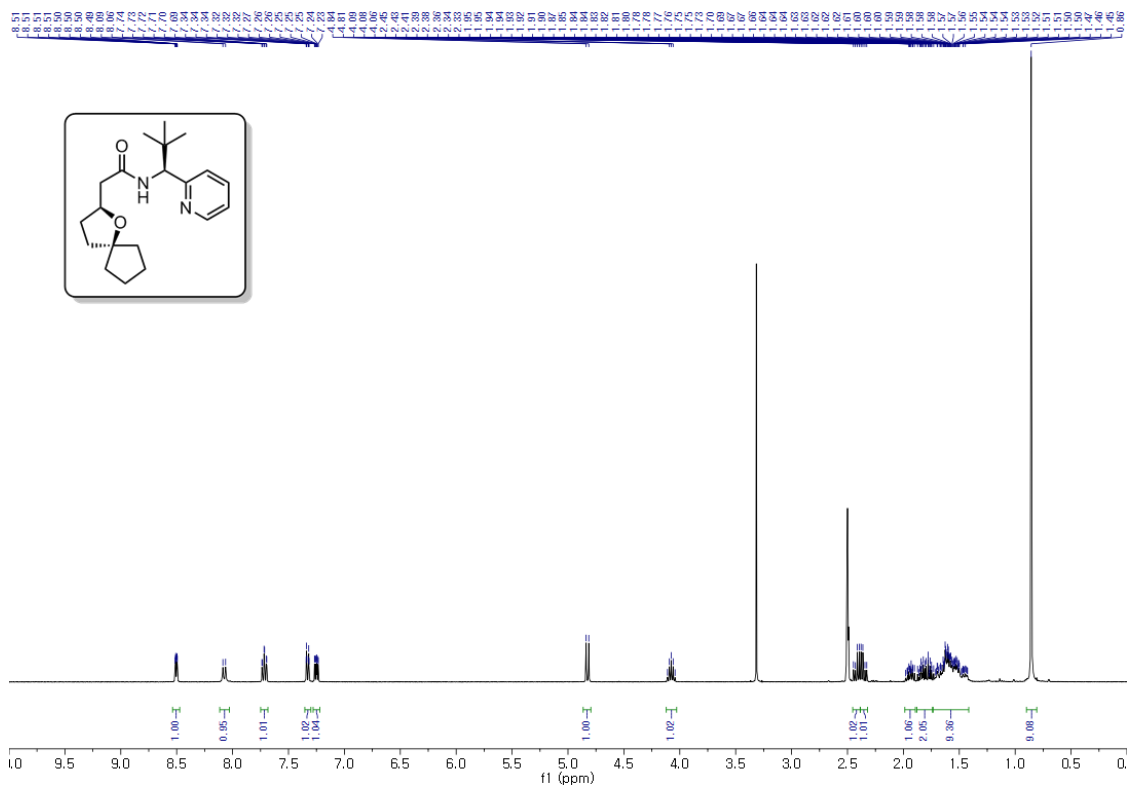

400 MHz, <sup>1</sup>H NMR in DMSO-*d*<sub>6</sub>

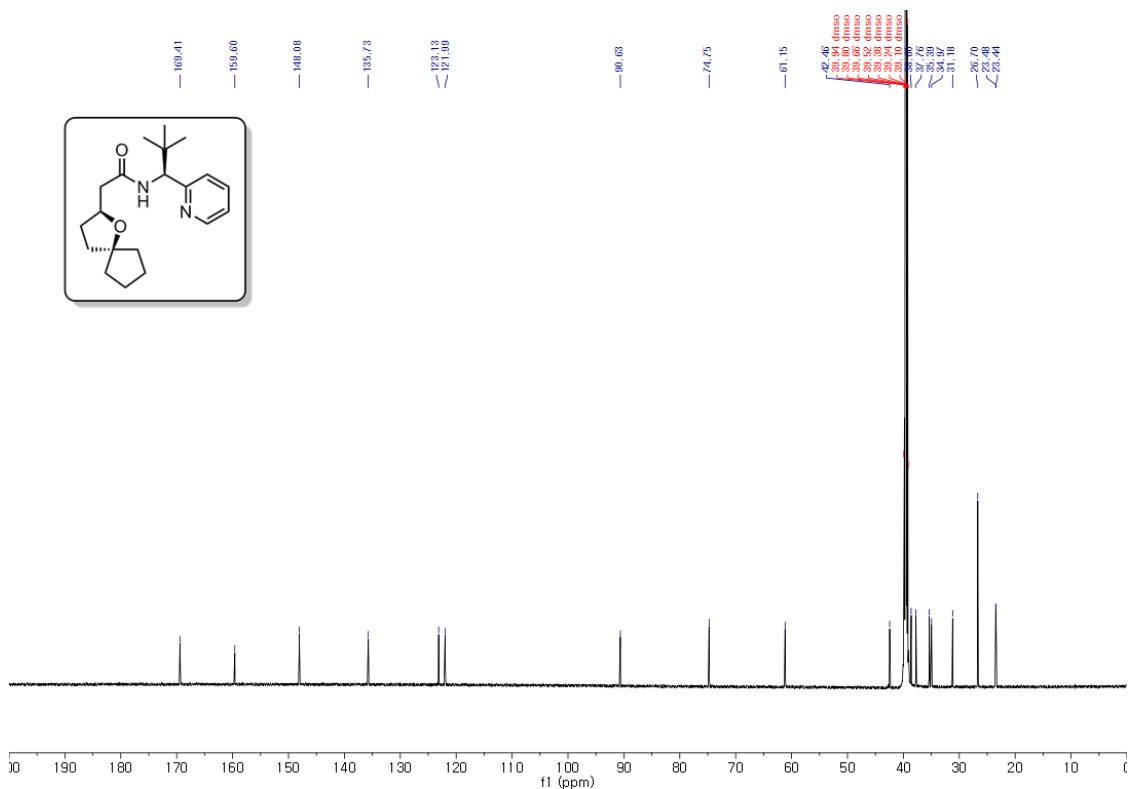

151 MHz, <sup>13</sup>C NMR in DMSO-*d*<sub>6</sub>





***N*-((*S*)-2,2-dimethyl-1-(pyridin-2-yl)propyl)-2-((*S*)-8,8-dimethyl-1-oxaspiro[4.5]decan-2-yl)acetamide (2l).**

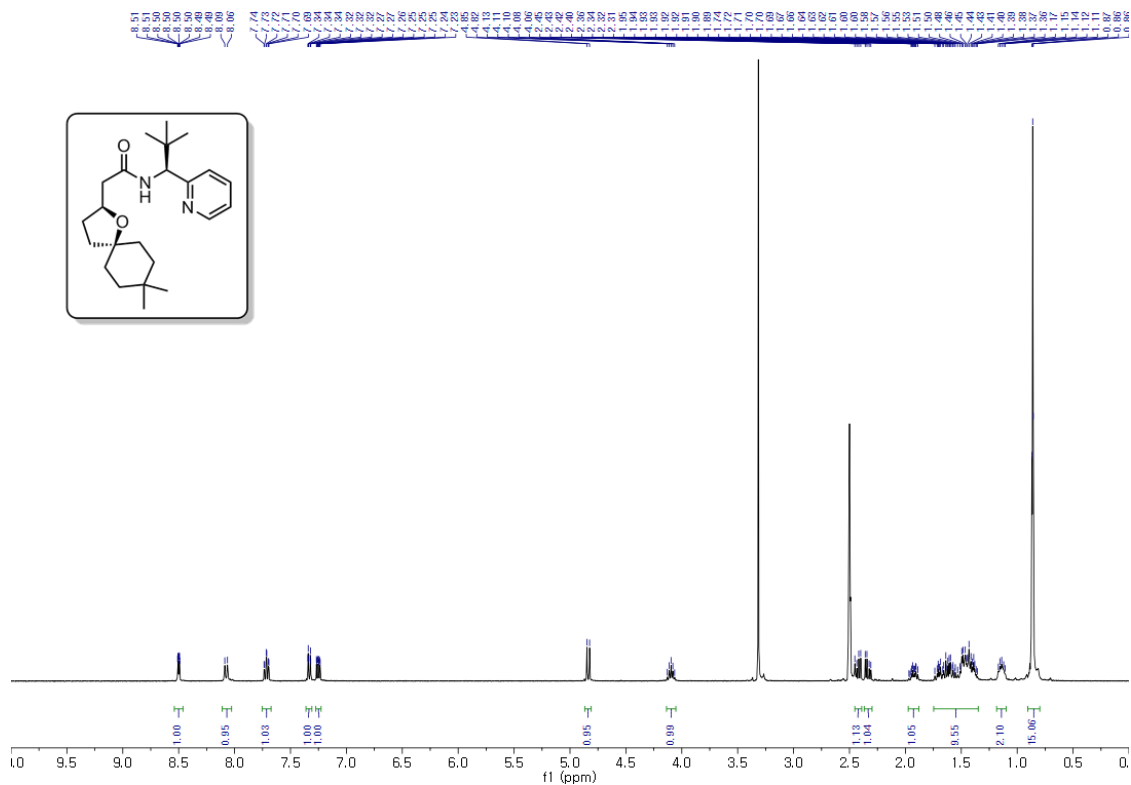

400 MHz,  $^1\text{H}$  NMR in  $\text{DMSO-}d_6$

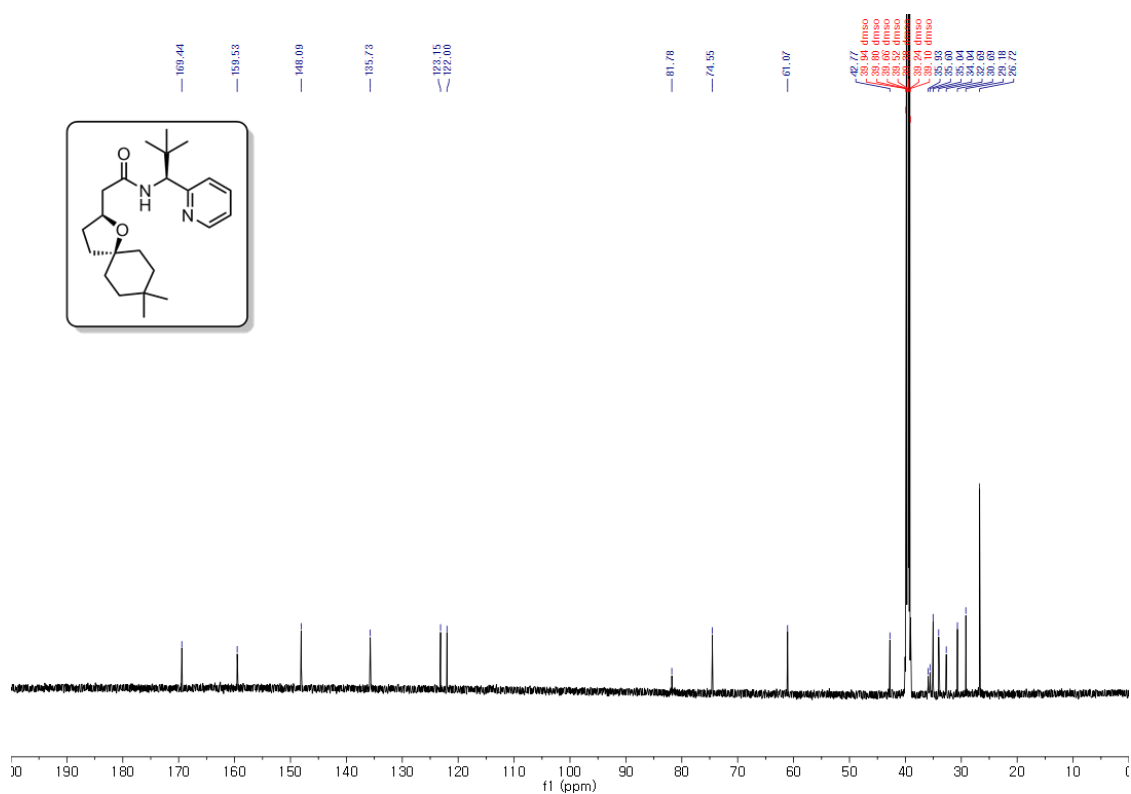

151 MHz,  $^{13}\text{C}$  NMR in  $\text{DMSO-}d_6$





*tert*-butyl (S)-2-(2-(((S)-2,2-dimethyl-1-(pyridin-2-yl)propyl)amino)-2-oxoethyl)-1-oxa-8-azaspiro[4.5]decane-8-carboxylate (2o).

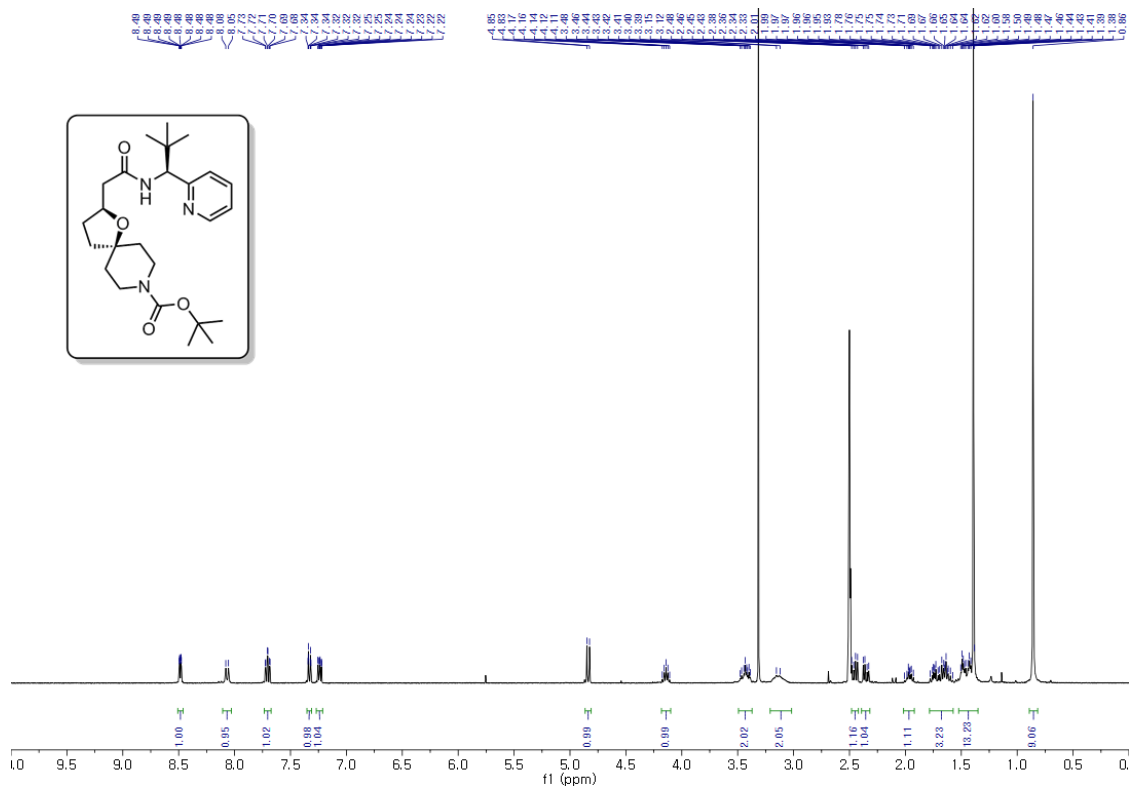

400 MHz, <sup>1</sup>H NMR in DMSO-*d*<sub>6</sub>

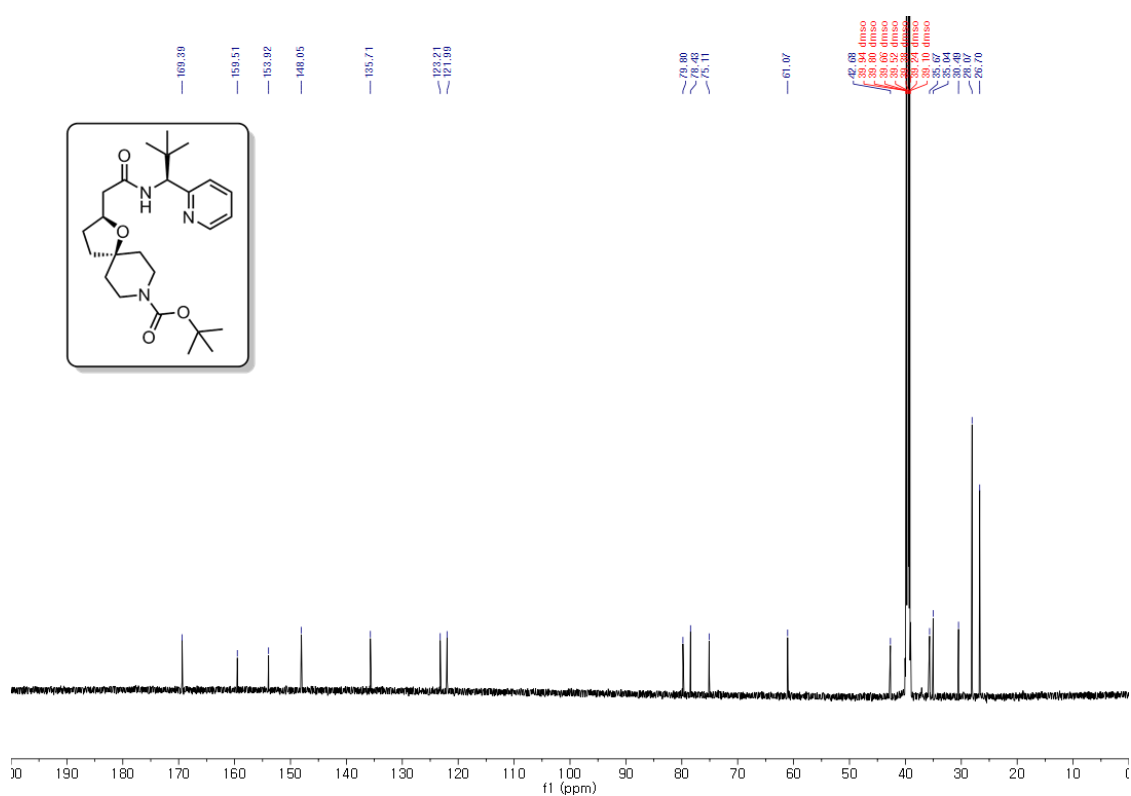

151 MHz, <sup>13</sup>C NMR in DMSO-*d*<sub>6</sub>

2-((*S*)-8-acetyl-1-oxa-8-azaspiro[4.5]decan-2-yl)-*N*-((*S*)-2,2-dimethyl-1-(pyridin-2-yl)propyl)acetamide (2p).

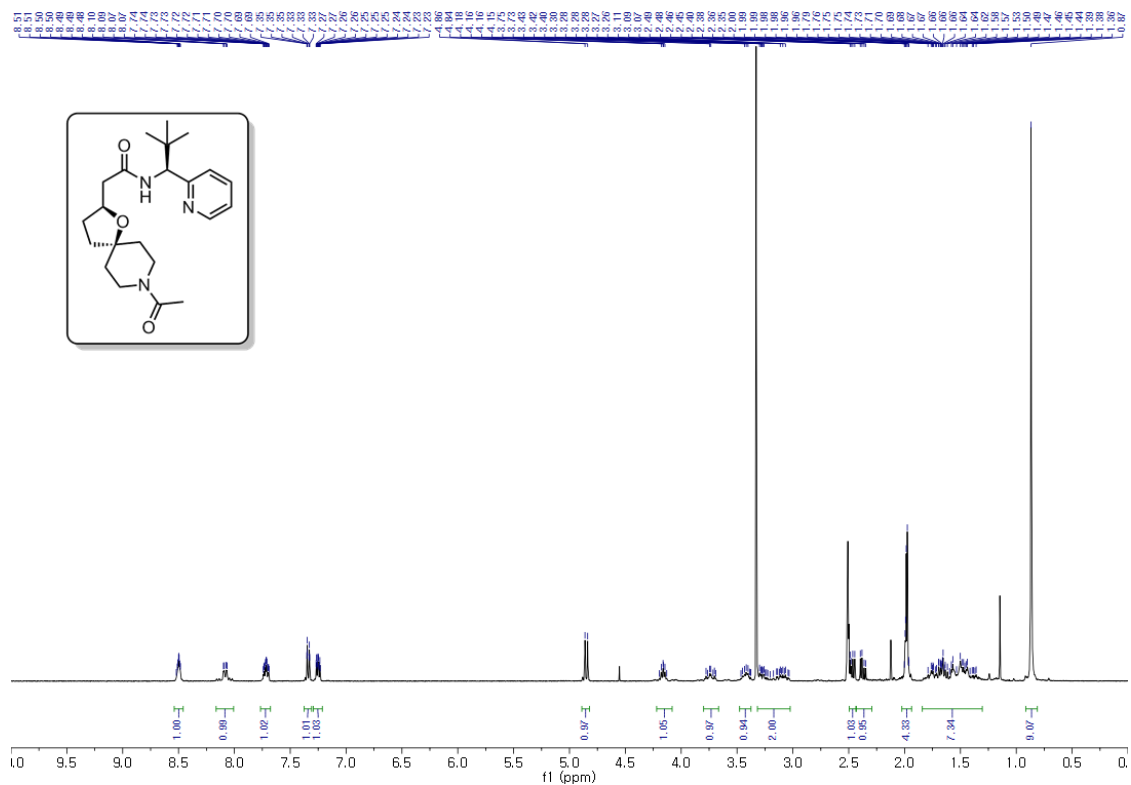

400 MHz, <sup>1</sup>H NMR in DMSO-*d*<sub>6</sub>

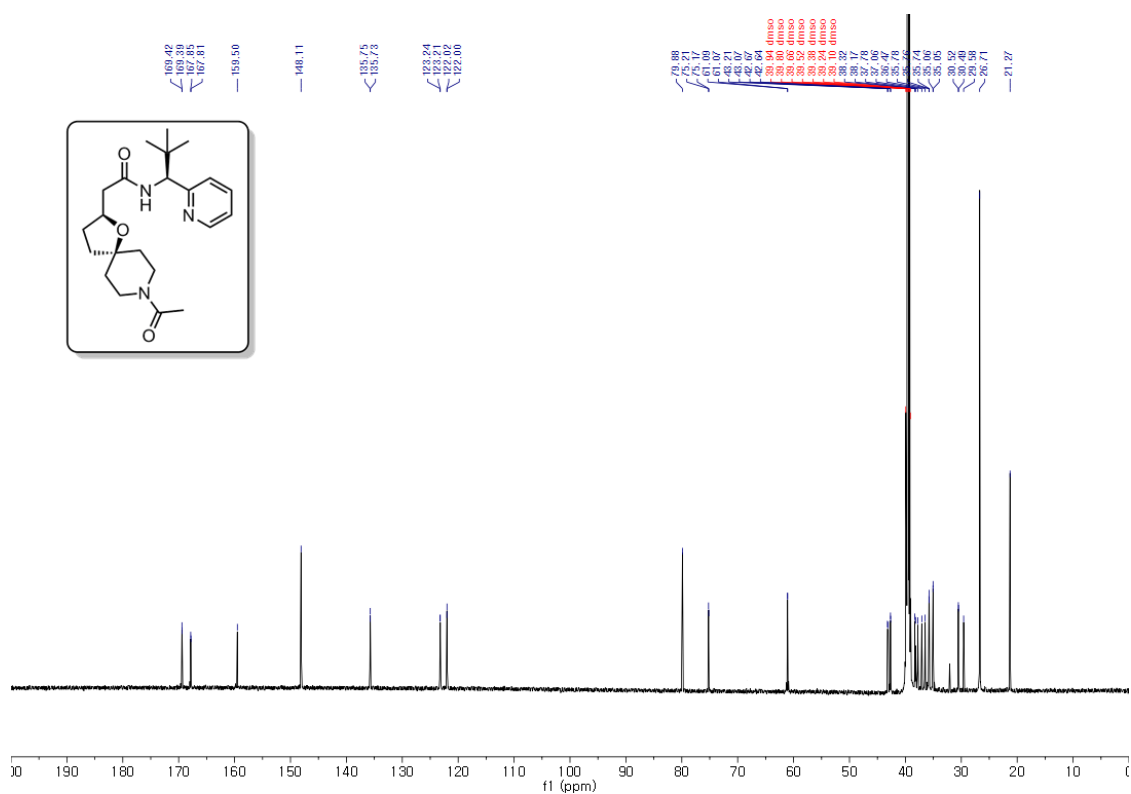

151 MHz, <sup>13</sup>C NMR in DMSO-*d*<sub>6</sub>











***N*-((*S*)-2,2-dimethyl-1-(pyridin-2-yl)propyl)-2-((*S*)-1-oxadispiro[4.2.5<sup>8</sup>.2<sup>5</sup>]pentadecan-2-yl)acetamide (2u).**

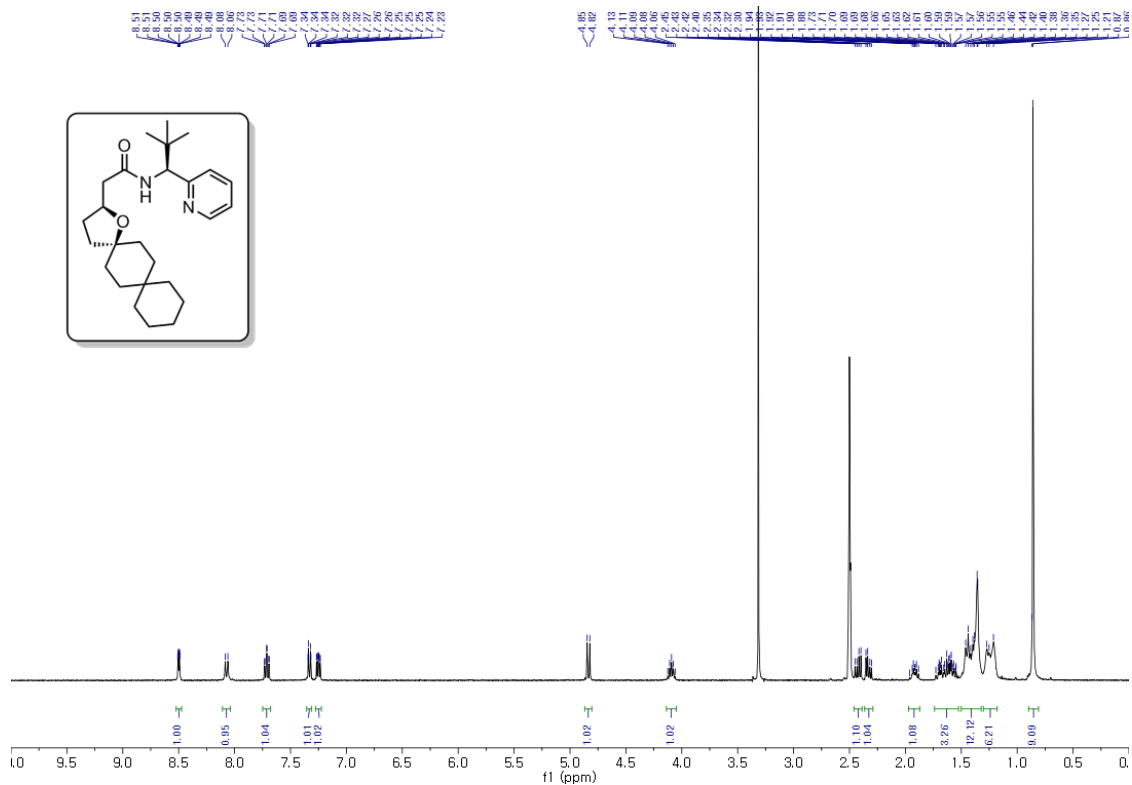

400 MHz, <sup>1</sup>H NMR in DMSO-*d*<sub>6</sub>

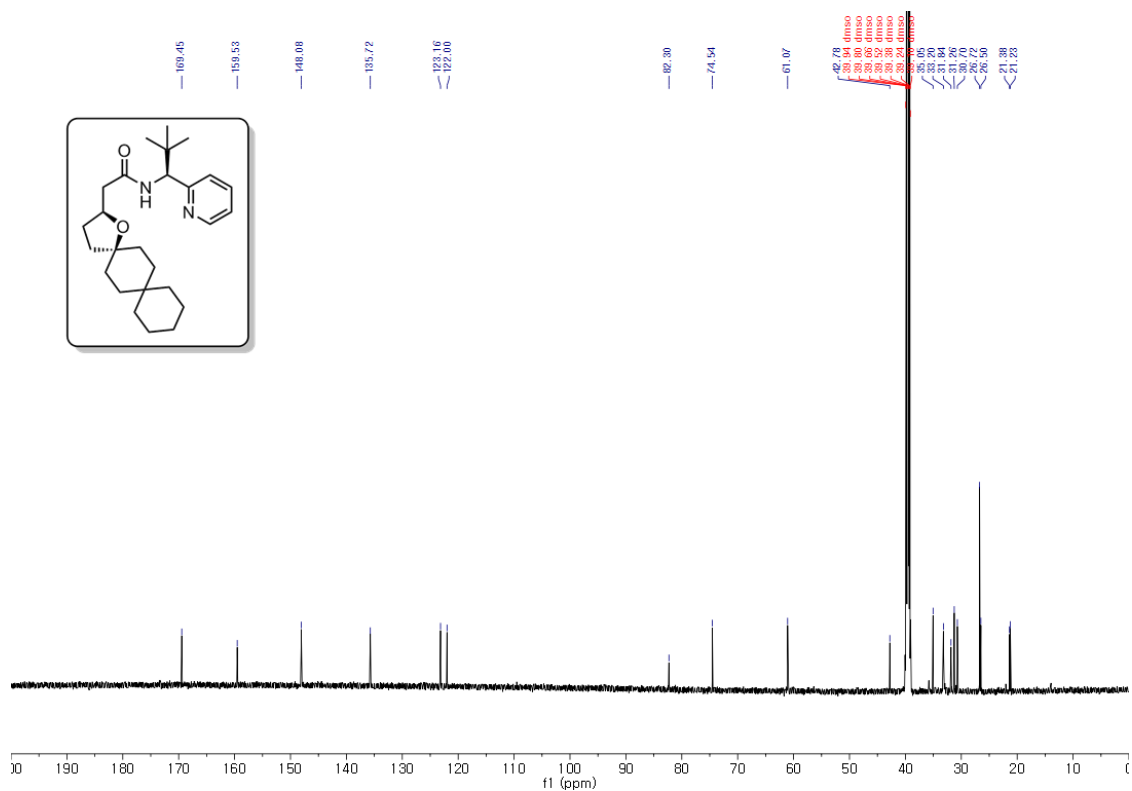

151 MHz, <sup>13</sup>C NMR in DMSO-*d*<sub>6</sub>



## HPLC Traces

*N*-((*S*)-2,2-dimethyl-1-(pyridin-2-yl)propyl)-2-((*S*)-tetrahydrofuran-2-yl)acetamide (2a).

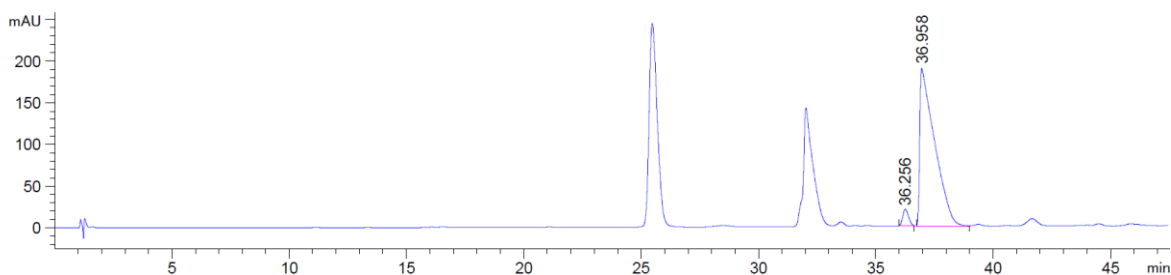

*N*-((*S*)-2,2-dimethyl-1-(pyridin-2-yl)propyl)-2-((*S*)-5-oxaspiro[3.4]octan-6-yl)acetamide (2c).

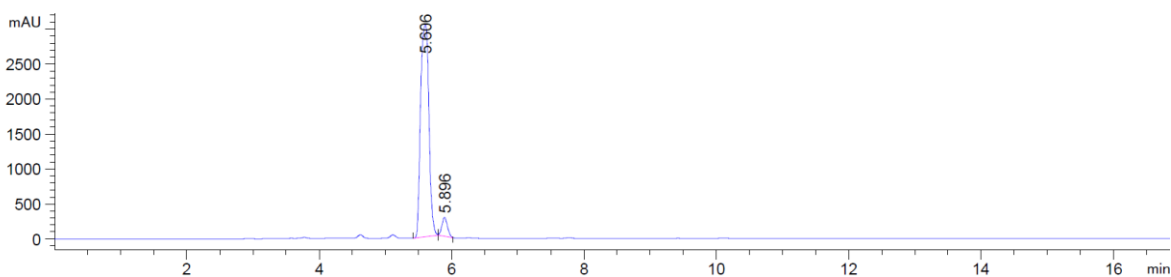

*tert*-butyl (S)-6-(2-(((*S*)-2,2-dimethyl-1-(pyridin-2-yl)propyl)amino)-2-oxoethyl)-5-oxa-2-azaspiro[3.4]octane-2-carboxylate (2f).

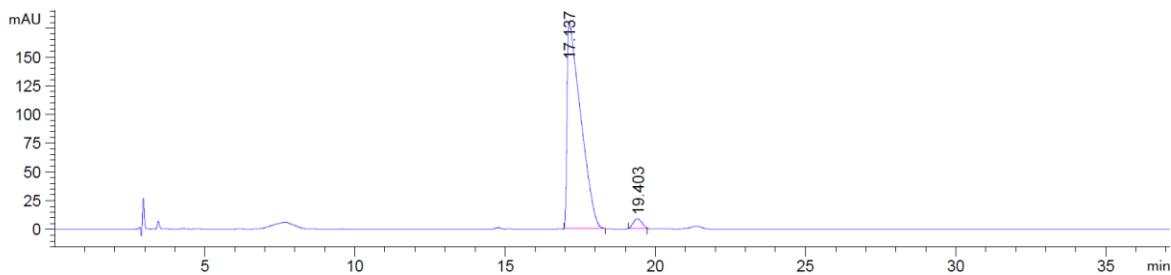

2-((*S*)-2-acetyl-5-oxa-2-azaspiro[3.4]octan-6-yl)-*N*-((*S*)-2,2-dimethyl-1-(pyridin-2-yl)propyl)acetamide (2g).

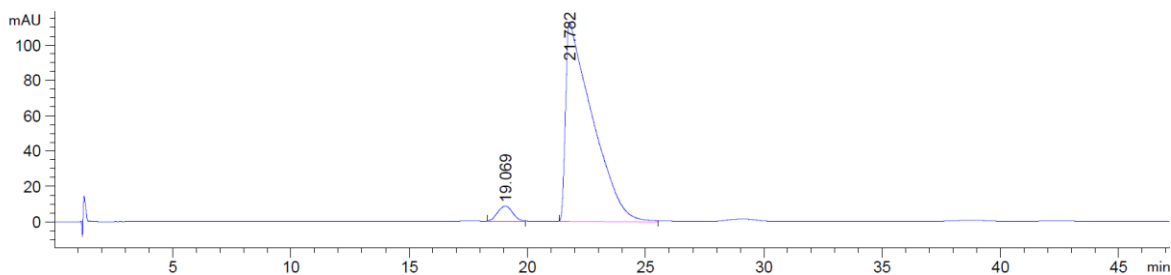

***N*-((*S*)-2,2-dimethyl-1-(pyridin-2-yl)propyl)-2-((*S*)-2-(methylsulfonyl)-5-oxa-2-azaspiro[3.4]octan-6-yl)acetamide (2h).**

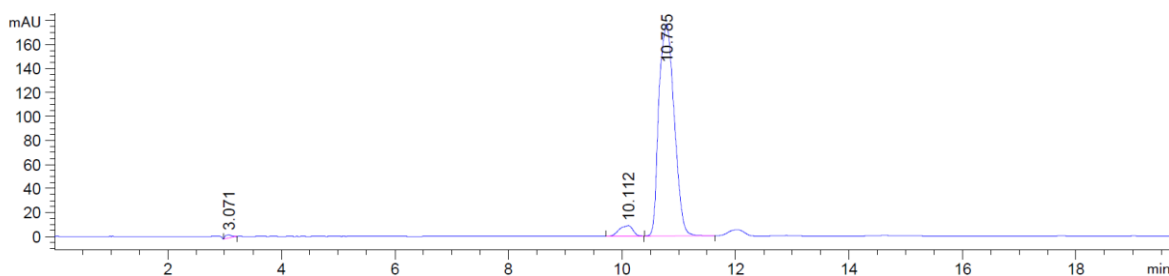

***N*-((*S*)-2,2-dimethyl-1-(pyridin-2-yl)propyl)-2-((*S*)-2-tosyl-5-oxa-2-azaspiro[3.4]octan-6-yl)acetamide (2i).**

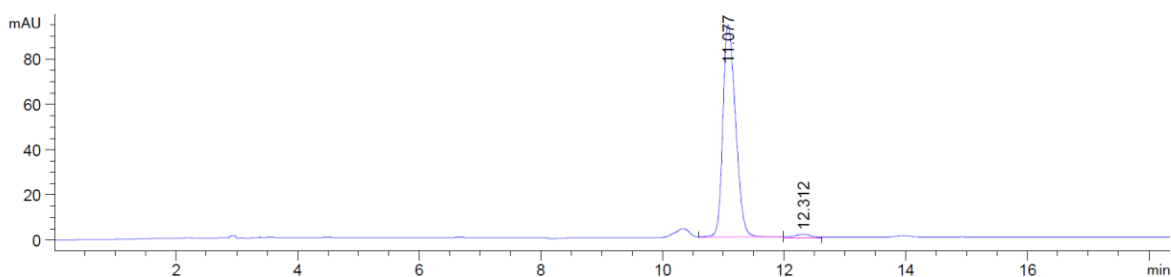

***N*-((*S*)-2,2-dimethyl-1-(pyridin-2-yl)propyl)-2-((*S*)-1-oxaspiro[4.4]nonan-2-yl)acetamide (2j).**

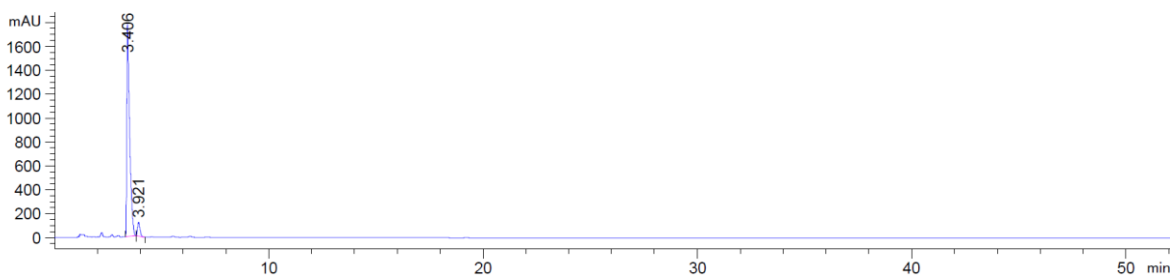

***N*-((*S*)-2,2-dimethyl-1-(pyridin-2-yl)propyl)-2-((*S*)-1-oxaspiro[4.5]decan-2-yl)acetamide (2k).**

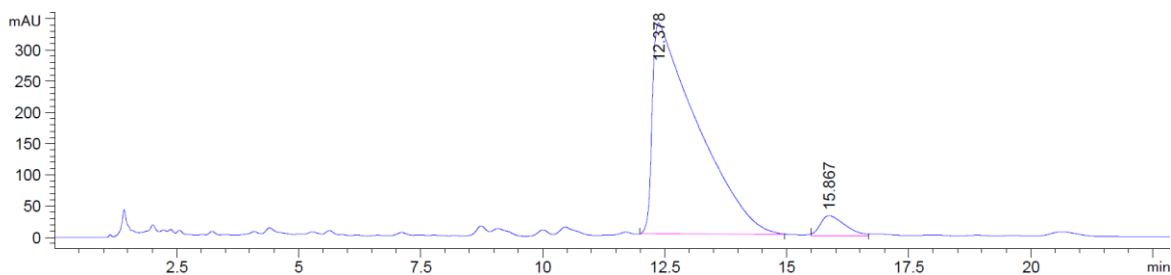

***N*-((*S*)-2,2-dimethyl-1-(pyridin-2-yl)propyl)-2-((*S*)-8,8-dimethyl-1-oxaspiro[4.5]decan-2-yl)acetamide (2l).**

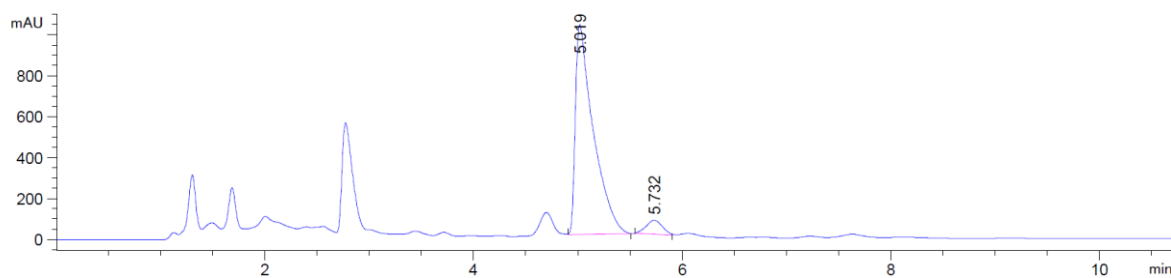

***N*-((*S*)-2,2-dimethyl-1-(pyridin-2-yl)propyl)-2-((*S*)-7,7,9,9-tetramethyl-1-oxaspiro[4.5]decan-2-yl)acetamide (2m).**

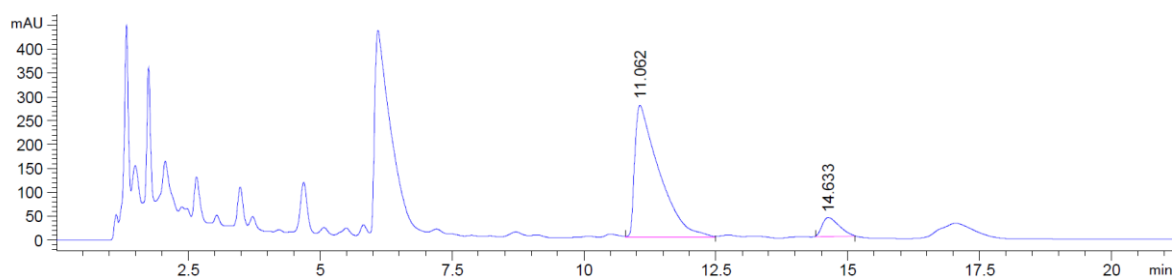

***N*-((*S*)-2,2-dimethyl-1-(pyridin-2-yl)propyl)-2-((*S*)-1,8-dioxaspiro[4.5]decan-2-yl)acetamide (2n).**

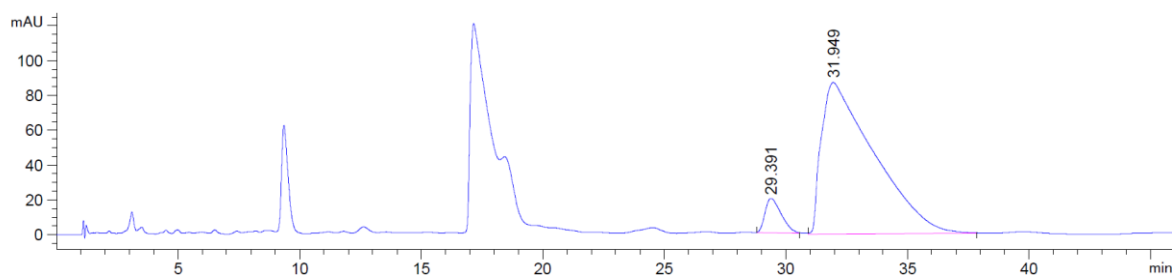

***tert*-butyl (S)-2-(2-(((*S*)-2,2-dimethyl-1-(pyridin-2-yl)propyl)amino)-2-oxoethyl)-1-oxa-8-azaspiro[4.5]decane-8-carboxylate (2o).**

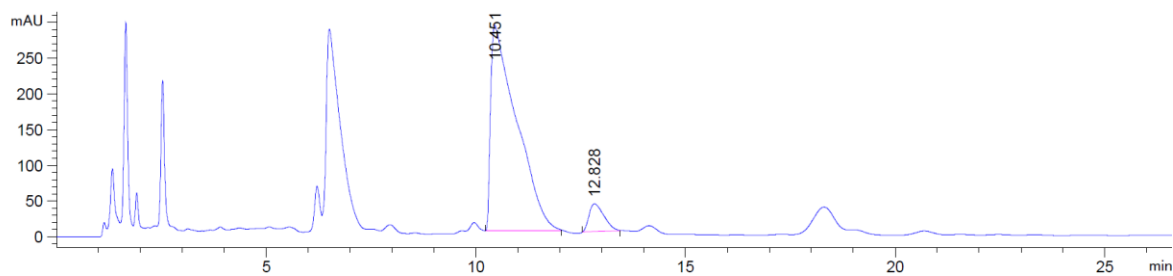

**2-((*S*)-8-acetyl-1-oxa-8-azaspiro[4.5]decan-2-yl)-*N*-((*S*)-2,2-dimethyl-1-(pyridin-2-yl)propyl)acetamide (2p).**

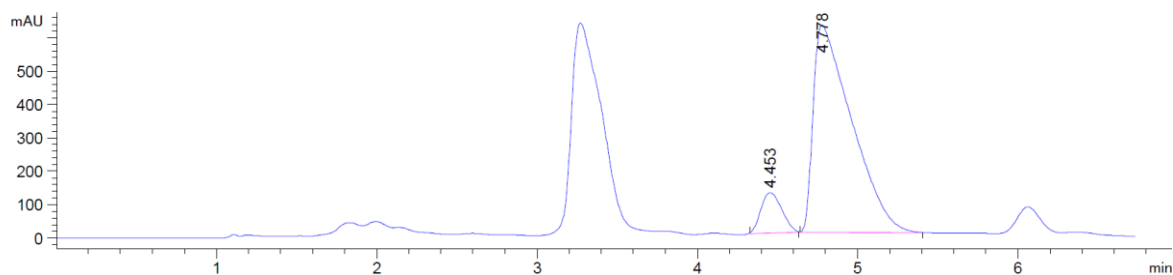

***N*-((*S*)-2,2-dimethyl-1-(pyridin-2-yl)propyl)-2-((*S*)-1-oxaspiro[4.6]undecan-2-yl)acetamide (2q).**

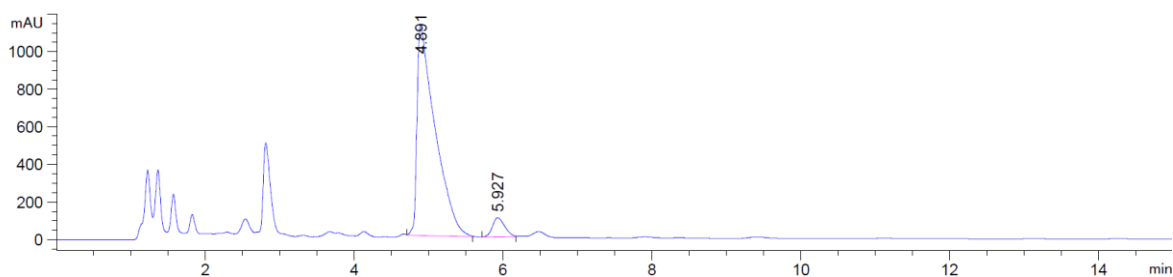

***N*-((*S*)-2,2-dimethyl-1-(pyridin-2-yl)propyl)-2-((*S*)-1-oxaspiro[4.7]dodecan-2-yl)acetamide (2r).**

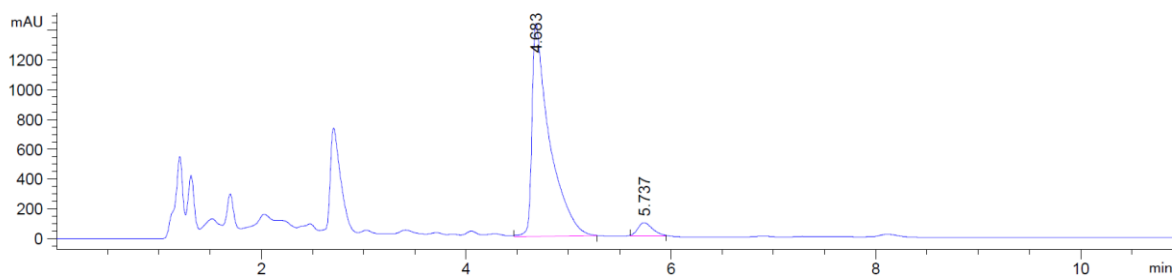

**2-((1*R*,5*S*,5'*S*)-dihydro-3'*H*-spiro[bicyclo[3.3.1]nonane-9,2'-furan]-5'-yl)-*N*-((*S*)-2,2-dimethyl-1-(pyridin-2-yl)propyl)acetamide (2s).**

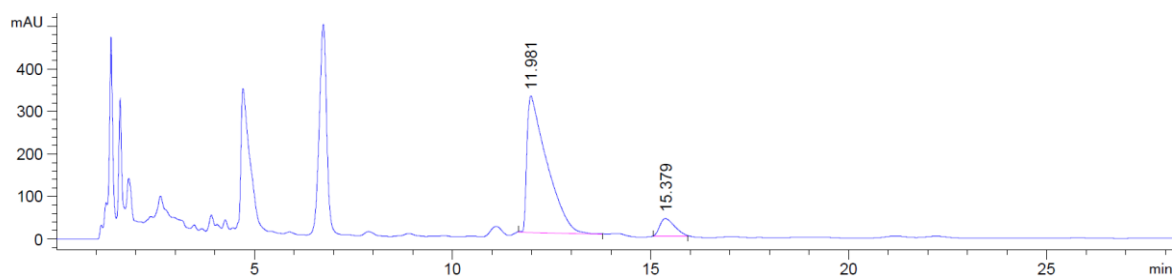



**2-((1*S*,3*S*,5*S*,5'*S*,7*S*)-dihydro-3'*H*-spiro[adamantane-2,2'-furan]-5'-yl)-*N*-((*S*)-2,2-dimethyl-1-(pyridin-2-yl)propyl)acetamide (2t).**

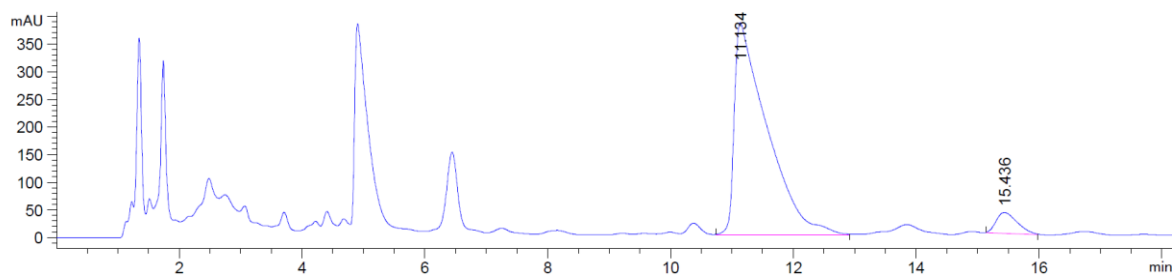

***N*-((*S*)-2,2-dimethyl-1-(pyridin-2-yl)propyl)-2-((*S*)-1-oxadispiro[4.2.5<sup>8</sup>.2<sup>5</sup>]pentadecan-2-yl)acetamide (2u).**

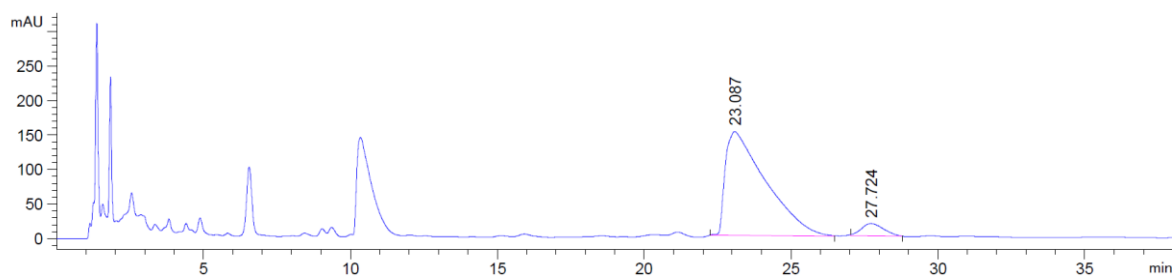

***tert*-butyl (S)-2-(2-(((*S*)-2,2-dimethyl-1-(pyridin-2-yl)propyl)amino)-2-oxoethyl)-1-oxa-11-azadispiro[4.2.5<sup>8</sup>.2<sup>5</sup>]pentadecane-11-carboxylate (2v).**

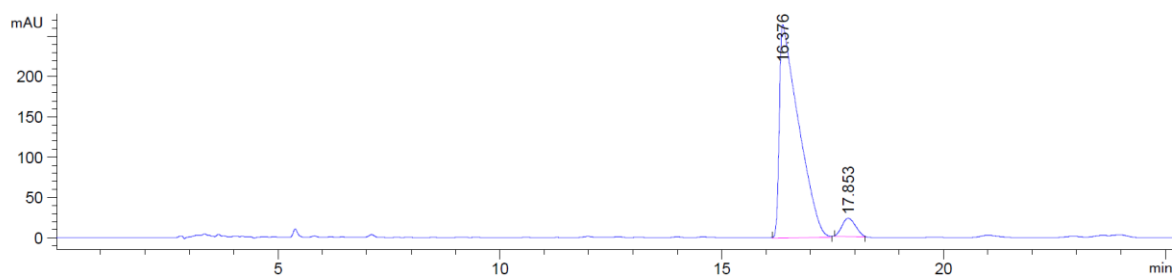

# *Appendix II*

## **Crystallographic Data for 2a**

Crystallographic Data for 2a(nos. CCDC 1581871)

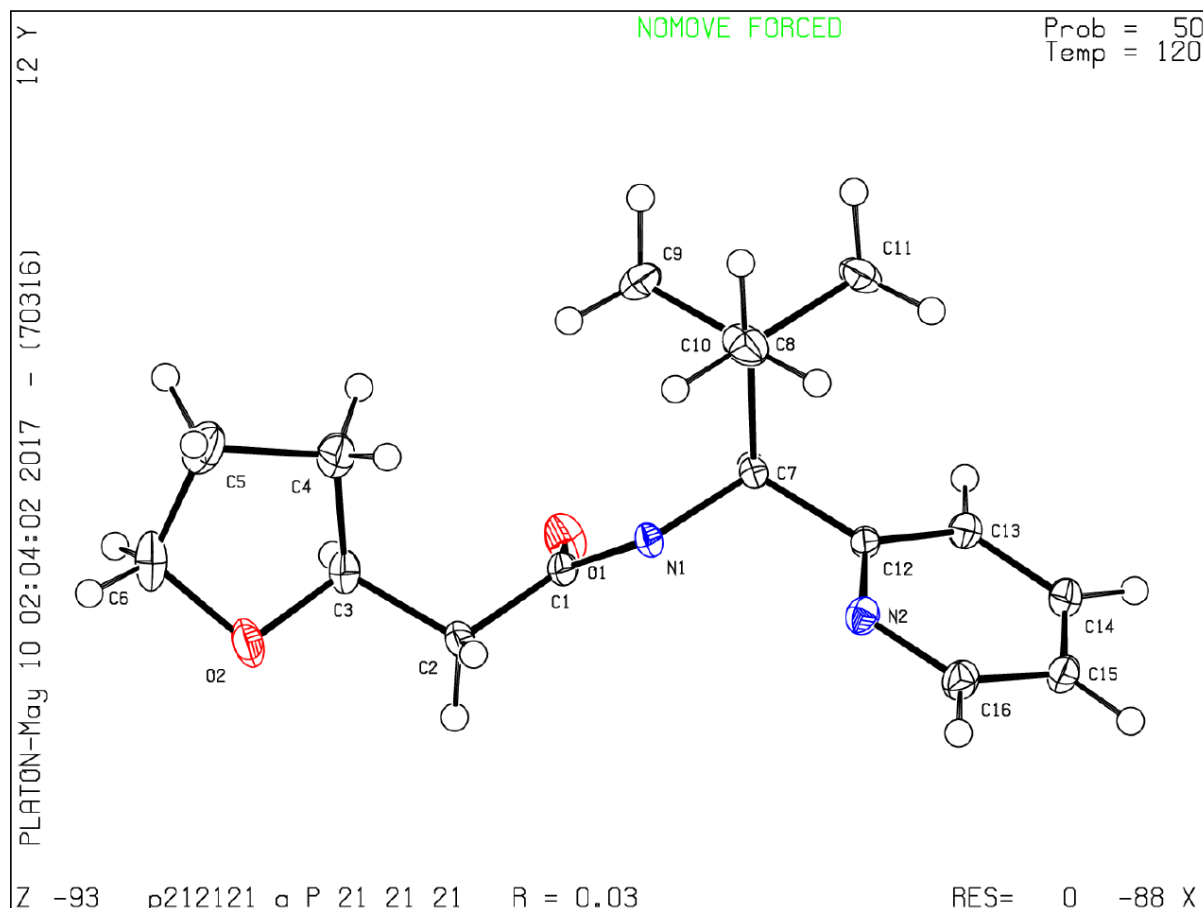

**Table S8.** Crystal data and structure refinement for **2a**.

|                      |                                                               |          |
|----------------------|---------------------------------------------------------------|----------|
| Identification code  | p212121_a                                                     |          |
| Empirical formula    | C <sub>16</sub> H <sub>23</sub> N <sub>2</sub> O <sub>2</sub> |          |
| Formula weight       | 275.36                                                        |          |
| Temperature          | 120(2) K                                                      |          |
| Wavelength           | 0.71073 Å                                                     |          |
| Crystal system       | Orthorhombic                                                  |          |
| Space group          | P2 <sub>1</sub> 2 <sub>1</sub> 2 <sub>1</sub>                 |          |
| Unit cell dimensions | a = 6.8237(4) Å                                               | α = 90°. |
|                      | b = 9.6779(6) Å                                               | β = 90°. |
|                      | c = 23.2090(13) Å                                             | γ = 90°. |
| Volume               | 1532.70(16) Å <sup>3</sup>                                    |          |
| Z                    | 4                                                             |          |

|                                   |                                             |
|-----------------------------------|---------------------------------------------|
| Density (calculated)              | 1.193 Mg/m <sup>3</sup>                     |
| Absorption coefficient            | 0.079 mm <sup>-1</sup>                      |
| F(000)                            | 596                                         |
| Crystal size                      | 0.380 x 0.350 x 0.240 mm <sup>3</sup>       |
| Theta range for data collection   | 3.371 to 33.198°.                           |
| Index ranges                      | -10<=h<=10, -14<=k<=14, -35<=l<=35          |
| Reflections collected             | 90932                                       |
| Independent reflections           | 5861 [R(int) = 0.0253]                      |
| Completeness to theta = 25.242°   | 99.7 %                                      |
| Absorption correction             | Semi-empirical from equivalents             |
| Max. and min. transmission        | 0.7456 and 0.6249                           |
| Refinement method                 | Full-matrix least-squares on F <sup>2</sup> |
| Data / restraints / parameters    | 5861 / 0 / 184                              |
| Goodness-of-fit on F <sup>2</sup> | 1.084                                       |
| Final R indices [I>2sigma(I)]     | R1 = 0.0338, wR2 = 0.0981                   |
| R indices (all data)              | R1 = 0.0349, wR2 = 0.0995                   |
| Absolute structure parameter      | -0.09(9)                                    |
| Extinction coefficient            | n/a                                         |
| Largest diff. peak and hole       | 0.607 and -0.252 e.Å <sup>-3</sup>          |

**Table S9.** Atomic coordinates ( $\times 10^4$ ) and equivalent isotropic displacement parameters ( $\text{\AA}^2 \times 10^3$ ) for **2a**.  $U(\text{eq})$  is defined as one third of the trace of the orthogonalized  $U^{ij}$  tensor.

|       | x       | y       | z       | U(eq) |
|-------|---------|---------|---------|-------|
| C(1)  | 4563(1) | 5289(1) | 2451(1) | 14(1) |
| C(2)  | 3672(2) | 6064(1) | 1947(1) | 17(1) |
| C(3)  | 4796(2) | 5746(1) | 1399(1) | 19(1) |
| C(4)  | 6918(2) | 6250(2) | 1389(1) | 31(1) |
| C(5)  | 7262(2) | 6668(2) | 754(1)  | 31(1) |
| C(6)  | 5297(3) | 6388(2) | 469(1)  | 31(1) |
| C(7)  | 6110(1) | 5480(1) | 3403(1) | 13(1) |
| C(8)  | 8369(1) | 5749(1) | 3421(1) | 18(1) |
| C(9)  | 9292(2) | 5066(2) | 2890(1) | 33(1) |
| C(10) | 8828(2) | 7300(1) | 3419(1) | 26(1) |
| C(11) | 9254(2) | 5076(1) | 3959(1) | 24(1) |
| C(12) | 5008(1) | 5961(1) | 3936(1) | 13(1) |
| C(13) | 4870(2) | 5092(1) | 4411(1) | 18(1) |
| C(14) | 3813(2) | 5518(1) | 4888(1) | 23(1) |
| C(15) | 2909(2) | 6804(1) | 4880(1) | 22(1) |
| C(16) | 3117(2) | 7610(1) | 4391(1) | 20(1) |
| N(1)  | 5222(1) | 6076(1) | 2888(1) | 13(1) |
| N(2)  | 4152(1) | 7211(1) | 3924(1) | 17(1) |
| O(1)  | 4671(2) | 4012(1) | 2450(1) | 24(1) |
| O(2)  | 3872(2) | 6445(1) | 923(1)  | 26(1) |

**Table S10.** Bond lengths [Å] and angles [°] for **2a**.

---

|              |            |
|--------------|------------|
| C(1)-O(1)    | 1.2374(12) |
| C(1)-N(1)    | 1.3464(12) |
| C(1)-C(2)    | 1.5170(14) |
| C(2)-C(3)    | 1.5166(14) |
| C(2)-H(2A)   | 0.9900     |
| C(2)-H(2B)   | 0.9900     |
| C(3)-O(2)    | 1.4400(14) |
| C(3)-C(4)    | 1.5278(19) |
| C(3)-H(3)    | 1.0000     |
| C(4)-C(5)    | 1.5468(18) |
| C(4)-H(4A)   | 0.9900     |
| C(4)-H(4B)   | 0.9900     |
| C(5)-C(6)    | 1.519(2)   |
| C(5)-H(5A)   | 0.9900     |
| C(5)-H(5B)   | 0.9900     |
| C(6)-O(2)    | 1.4351(17) |
| C(6)-H(6A)   | 0.9900     |
| C(6)-H(6B)   | 0.9900     |
| C(7)-N(1)    | 1.4589(12) |
| C(7)-C(12)   | 1.5201(13) |
| C(7)-C(8)    | 1.5638(14) |
| C(7)-H(7)    | 1.0000     |
| C(8)-C(9)    | 1.5331(16) |
| C(8)-C(10)   | 1.5333(17) |
| C(8)-C(11)   | 1.5337(15) |
| C(9)-H(9A)   | 0.9800     |
| C(9)-H(9B)   | 0.9800     |
| C(9)-H(9C)   | 0.9800     |
| C(10)-H(10A) | 0.9800     |
| C(10)-H(10B) | 0.9800     |
| C(10)-H(10C) | 0.9800     |
| C(11)-H(11A) | 0.9800     |
| C(11)-H(11B) | 0.9800     |
| C(11)-H(11C) | 0.9800     |
| C(12)-N(2)   | 1.3437(13) |
| C(12)-C(13)  | 1.3902(13) |

|             |            |
|-------------|------------|
| C(13)-C(14) | 1.3850(15) |
| C(13)-H(13) | 0.9500     |
| C(14)-C(15) | 1.3893(18) |
| C(14)-H(14) | 0.9500     |
| C(15)-C(16) | 1.3852(17) |
| C(15)-H(15) | 0.9500     |
| C(16)-N(2)  | 1.3488(13) |
| C(16)-H(16) | 0.9500     |

|                  |            |
|------------------|------------|
| O(1)-C(1)-N(1)   | 123.06(9)  |
| O(1)-C(1)-C(2)   | 121.13(9)  |
| N(1)-C(1)-C(2)   | 115.81(8)  |
| C(3)-C(2)-C(1)   | 110.13(8)  |
| C(3)-C(2)-H(2A)  | 109.6      |
| C(1)-C(2)-H(2A)  | 109.6      |
| C(3)-C(2)-H(2B)  | 109.6      |
| C(1)-C(2)-H(2B)  | 109.6      |
| H(2A)-C(2)-H(2B) | 108.1      |
| O(2)-C(3)-C(2)   | 109.05(9)  |
| O(2)-C(3)-C(4)   | 104.71(9)  |
| C(2)-C(3)-C(4)   | 115.29(9)  |
| O(2)-C(3)-H(3)   | 109.2      |
| C(2)-C(3)-H(3)   | 109.2      |
| C(4)-C(3)-H(3)   | 109.2      |
| C(3)-C(4)-C(5)   | 103.98(11) |
| C(3)-C(4)-H(4A)  | 111.0      |
| C(5)-C(4)-H(4A)  | 111.0      |
| C(3)-C(4)-H(4B)  | 111.0      |
| C(5)-C(4)-H(4B)  | 111.0      |
| H(4A)-C(4)-H(4B) | 109.0      |
| C(6)-C(5)-C(4)   | 103.52(11) |
| C(6)-C(5)-H(5A)  | 111.1      |
| C(4)-C(5)-H(5A)  | 111.1      |
| C(6)-C(5)-H(5B)  | 111.1      |
| C(4)-C(5)-H(5B)  | 111.1      |
| H(5A)-C(5)-H(5B) | 109.0      |
| O(2)-C(6)-C(5)   | 105.79(10) |
| O(2)-C(6)-H(6A)  | 110.6      |

|                     |            |
|---------------------|------------|
| C(5)-C(6)-H(6A)     | 110.6      |
| O(2)-C(6)-H(6B)     | 110.6      |
| C(5)-C(6)-H(6B)     | 110.6      |
| H(6A)-C(6)-H(6B)    | 108.7      |
| N(1)-C(7)-C(12)     | 109.86(7)  |
| N(1)-C(7)-C(8)      | 111.39(8)  |
| C(12)-C(7)-C(8)     | 114.55(8)  |
| N(1)-C(7)-H(7)      | 106.9      |
| C(12)-C(7)-H(7)     | 106.9      |
| C(8)-C(7)-H(7)      | 106.9      |
| C(9)-C(8)-C(10)     | 109.62(11) |
| C(9)-C(8)-C(11)     | 108.05(10) |
| C(10)-C(8)-C(11)    | 109.72(9)  |
| C(9)-C(8)-C(7)      | 108.21(9)  |
| C(10)-C(8)-C(7)     | 111.37(9)  |
| C(11)-C(8)-C(7)     | 109.80(8)  |
| C(8)-C(9)-H(9A)     | 109.5      |
| C(8)-C(9)-H(9B)     | 109.5      |
| H(9A)-C(9)-H(9B)    | 109.5      |
| C(8)-C(9)-H(9C)     | 109.5      |
| H(9A)-C(9)-H(9C)    | 109.5      |
| H(9B)-C(9)-H(9C)    | 109.5      |
| C(8)-C(10)-H(10A)   | 109.5      |
| C(8)-C(10)-H(10B)   | 109.5      |
| H(10A)-C(10)-H(10B) | 109.5      |
| C(8)-C(10)-H(10C)   | 109.5      |
| H(10A)-C(10)-H(10C) | 109.5      |
| H(10B)-C(10)-H(10C) | 109.5      |
| C(8)-C(11)-H(11A)   | 109.5      |
| C(8)-C(11)-H(11B)   | 109.5      |
| H(11A)-C(11)-H(11B) | 109.5      |
| C(8)-C(11)-H(11C)   | 109.5      |
| H(11A)-C(11)-H(11C) | 109.5      |
| H(11B)-C(11)-H(11C) | 109.5      |
| N(2)-C(12)-C(13)    | 122.11(9)  |
| N(2)-C(12)-C(7)     | 118.34(8)  |
| C(13)-C(12)-C(7)    | 119.52(9)  |
| C(14)-C(13)-C(12)   | 119.29(10) |



|                   |            |
|-------------------|------------|
| C(14)-C(13)-H(13) | 120.4      |
| C(12)-C(13)-H(13) | 120.4      |
| C(13)-C(14)-C(15) | 119.18(10) |
| C(13)-C(14)-H(14) | 120.4      |
| C(15)-C(14)-H(14) | 120.4      |
| C(16)-C(15)-C(14) | 118.01(10) |
| C(16)-C(15)-H(15) | 121.0      |
| C(14)-C(15)-H(15) | 121.0      |
| N(2)-C(16)-C(15)  | 123.45(11) |
| N(2)-C(16)-H(16)  | 118.3      |
| C(15)-C(16)-H(16) | 118.3      |
| C(1)-N(1)-C(7)    | 122.17(8)  |
| C(12)-N(2)-C(16)  | 117.96(9)  |
| C(6)-O(2)-C(3)    | 104.36(10) |

---

Symmetry transformations used to generate equivalent atoms:

**Table S11.** Anisotropic displacement parameters ( $\text{\AA}^2 \times 10^3$ ) for **2a**. The anisotropic displacement factor exponent takes the form:  $-2\pi^2[ h^2 a^{*2}U^{11} + \dots + 2 h k a^* b^* U^{12} ]$

|       | U <sup>11</sup> | U <sup>22</sup> | U <sup>33</sup> | U <sup>23</sup> | U <sup>13</sup> | U <sup>12</sup> |
|-------|-----------------|-----------------|-----------------|-----------------|-----------------|-----------------|
| C(1)  | 15(1)           | 16(1)           | 12(1)           | -2(1)           | -1(1)           | 0(1)            |
| C(2)  | 19(1)           | 21(1)           | 12(1)           | -2(1)           | -2(1)           | 2(1)            |
| C(3)  | 25(1)           | 20(1)           | 12(1)           | -2(1)           | 0(1)            | 0(1)            |
| C(4)  | 24(1)           | 50(1)           | 19(1)           | 2(1)            | 2(1)            | -4(1)           |
| C(5)  | 35(1)           | 34(1)           | 25(1)           | 6(1)            | 9(1)            | -2(1)           |
| C(6)  | 47(1)           | 33(1)           | 13(1)           | 2(1)            | 2(1)            | -2(1)           |
| C(7)  | 14(1)           | 14(1)           | 11(1)           | 0(1)            | -1(1)           | 1(1)            |
| C(8)  | 13(1)           | 26(1)           | 14(1)           | 1(1)            | -1(1)           | 0(1)            |
| C(9)  | 18(1)           | 57(1)           | 22(1)           | -9(1)           | 4(1)            | 6(1)            |
| C(10) | 20(1)           | 30(1)           | 28(1)           | 9(1)            | -5(1)           | -9(1)           |
| C(11) | 17(1)           | 31(1)           | 24(1)           | 6(1)            | -5(1)           | 2(1)            |
| C(12) | 13(1)           | 16(1)           | 11(1)           | 0(1)            | 0(1)            | -2(1)           |
| C(13) | 17(1)           | 22(1)           | 16(1)           | 4(1)            | 2(1)            | 0(1)            |
| C(14) | 19(1)           | 35(1)           | 15(1)           | 5(1)            | 2(1)            | -1(1)           |
| C(15) | 17(1)           | 34(1)           | 14(1)           | -4(1)           | 2(1)            | -2(1)           |
| C(16) | 20(1)           | 22(1)           | 18(1)           | -5(1)           | 1(1)            | -1(1)           |
| N(1)  | 16(1)           | 13(1)           | 11(1)           | -1(1)           | -2(1)           | 0(1)            |
| N(2)  | 19(1)           | 17(1)           | 15(1)           | -2(1)           | 1(1)            | -1(1)           |
| O(1)  | 36(1)           | 14(1)           | 22(1)           | -4(1)           | -7(1)           | 0(1)            |
| O(2)  | 33(1)           | 33(1)           | 13(1)           | 1(1)            | -6(1)           | 1(1)            |

**Table S12.** Hydrogen coordinates ( $\times 10^4$ ) and isotropic displacement parameters ( $\text{\AA}^2 \times 10^{-3}$ ) for **2a**.

|        | x     | y    | z    | U(eq) |
|--------|-------|------|------|-------|
| H(2A)  | 2284  | 5789 | 1899 | 20    |
| H(2B)  | 3713  | 7070 | 2024 | 20    |
| H(3)   | 4770  | 4727 | 1328 | 23    |
| H(4A)  | 7827  | 5504 | 1506 | 37    |
| H(4B)  | 7098  | 7050 | 1649 | 37    |
| H(5A)  | 7621  | 7656 | 723  | 38    |
| H(5B)  | 8311  | 6101 | 577  | 38    |
| H(6A)  | 5013  | 7095 | 172  | 37    |
| H(6B)  | 5293  | 5466 | 284  | 37    |
| H(7)   | 5926  | 4457 | 3377 | 16    |
| H(9A)  | 10722 | 5150 | 2911 | 49    |
| H(9B)  | 8816  | 5524 | 2541 | 49    |
| H(9C)  | 8929  | 4086 | 2879 | 49    |
| H(10A) | 8268  | 7729 | 3764 | 39    |
| H(10B) | 8259  | 7726 | 3074 | 39    |
| H(10C) | 10251 | 7435 | 3417 | 39    |
| H(11A) | 8901  | 4094 | 3969 | 36    |
| H(11B) | 8742  | 5535 | 4304 | 36    |
| H(11C) | 10683 | 5168 | 3949 | 36    |
| H(13)  | 5494  | 4214 | 4408 | 22    |
| H(14)  | 3707  | 4938 | 5217 | 28    |
| H(15)  | 2171  | 7122 | 5201 | 26    |
| H(16)  | 2499  | 8489 | 4383 | 24    |

**Table S13.** Torsion angles [°] for **2a**.

---

|                         |             |
|-------------------------|-------------|
| O(1)-C(1)-C(2)-C(3)     | -59.22(13)  |
| N(1)-C(1)-C(2)-C(3)     | 120.41(10)  |
| C(1)-C(2)-C(3)-O(2)     | 177.49(8)   |
| C(1)-C(2)-C(3)-C(4)     | -65.10(13)  |
| O(2)-C(3)-C(4)-C(5)     | -25.32(13)  |
| C(2)-C(3)-C(4)-C(5)     | -145.14(11) |
| C(3)-C(4)-C(5)-C(6)     | 1.04(15)    |
| C(4)-C(5)-C(6)-O(2)     | 23.76(15)   |
| N(1)-C(7)-C(8)-C(9)     | -60.85(12)  |
| C(12)-C(7)-C(8)-C(9)    | 173.70(10)  |
| N(1)-C(7)-C(8)-C(10)    | 59.71(11)   |
| C(12)-C(7)-C(8)-C(10)   | -65.74(11)  |
| N(1)-C(7)-C(8)-C(11)    | -178.56(8)  |
| C(12)-C(7)-C(8)-C(11)   | 55.99(11)   |
| N(1)-C(7)-C(12)-N(2)    | -30.38(11)  |
| C(8)-C(7)-C(12)-N(2)    | 95.86(10)   |
| N(1)-C(7)-C(12)-C(13)   | 147.94(9)   |
| C(8)-C(7)-C(12)-C(13)   | -85.81(11)  |
| N(2)-C(12)-C(13)-C(14)  | 0.25(16)    |
| C(7)-C(12)-C(13)-C(14)  | -178.02(9)  |
| C(12)-C(13)-C(14)-C(15) | 0.22(16)    |
| C(13)-C(14)-C(15)-C(16) | -0.25(17)   |
| C(14)-C(15)-C(16)-N(2)  | -0.17(17)   |
| O(1)-C(1)-N(1)-C(7)     | -0.57(15)   |
| C(2)-C(1)-N(1)-C(7)     | 179.81(8)   |
| C(12)-C(7)-N(1)-C(1)    | -123.56(9)  |
| C(8)-C(7)-N(1)-C(1)     | 108.43(10)  |
| C(13)-C(12)-N(2)-C(16)  | -0.65(15)   |
| C(7)-C(12)-N(2)-C(16)   | 177.63(9)   |
| C(15)-C(16)-N(2)-C(12)  | 0.62(16)    |
| C(5)-C(6)-O(2)-C(3)     | -40.99(13)  |
| C(2)-C(3)-O(2)-C(6)     | 165.21(10)  |
| C(4)-C(3)-O(2)-C(6)     | 41.30(12)   |

---

Symmetry transformations used to generate equivalent atoms:
